# Supplementary material for: Benzimidazole derivatives as dual EGFR and BRAFV600E inhibitors with pro-apoptotic antiproliferative potential
Source: Royal Society of Chemistry journal article supplement (doi:10.1039/d6ra02117d), 2026-05-14
Supplement: d6ra02117d1.pdf [file d6ra02117d1.pdf]

## Supplementary Data

### **Benzimidazole Derivatives as Dual EGFR and BRAF<sup>V600E</sup> Inhibitors with Pro-Apoptotic Antiproliferative Potential**

Lamya H. Al-Wahaibi<sup>1</sup>, Mohamed Samir<sup>2</sup>, Stefan Bräse<sup>3\*</sup>, Bahaa G. M. Youssif<sup>\*4</sup>, Martha M. Morcoss<sup>5</sup>

<sup>1</sup>Department of Chemistry, College of Sciences, Princess Nourah bint Abdulrahman University, Riyadh 11671, Saudi Arabia; <sup>2</sup>Department of Pharmaceutical Organic Chemistry, Faculty of Pharmacy, Al-Azhar University, 71524 Assiut, Egypt; <sup>3</sup>Institute of Biological and Chemical Systems, IBCS-FMS, Karlsruhe Institute of Technology, 76131 Karlsruhe, Germany; <sup>4</sup>Department of Pharmaceutical Organic Chemistry, Faculty of Pharmacy, Assiut University, Assiut-71526, Egypt; <sup>5</sup>Department of Pharmaceutical Chemistry, Faculty of Pharmacy, Nahda University, 62513 Beni-Suef, Egypt.

*\*To whom correspondence should be addressed:*

**Bahaa G. M. Youssif**, Ph.D. Pharmaceutical Organic Chemistry Department, Faculty of Pharmacy, Assiut University, Assiut 71526, Egypt.

Tel.: (002)-01044353895

E-mail address: [bgyoussif2@gmail.com](mailto:bgyoussif2@gmail.com)

**Stefan Bräse**

Institute of Biological and Chemical Systems, IBCS-FMS, Karlsruhe Institute of Technology, 76131 Karlsruhe, Germany. E-mail: [braese@kit.edu](mailto:braese@kit.edu)

## Contents

☐ Copies of  $^1\text{H}$  NMR,  $^{13}\text{C}$  NMR and Mass spectra of all compounds

S1:  $^1\text{H}$  NMR spectrum of compound **3a** (400 MHz,  $\text{DMSO-}d_6$ )

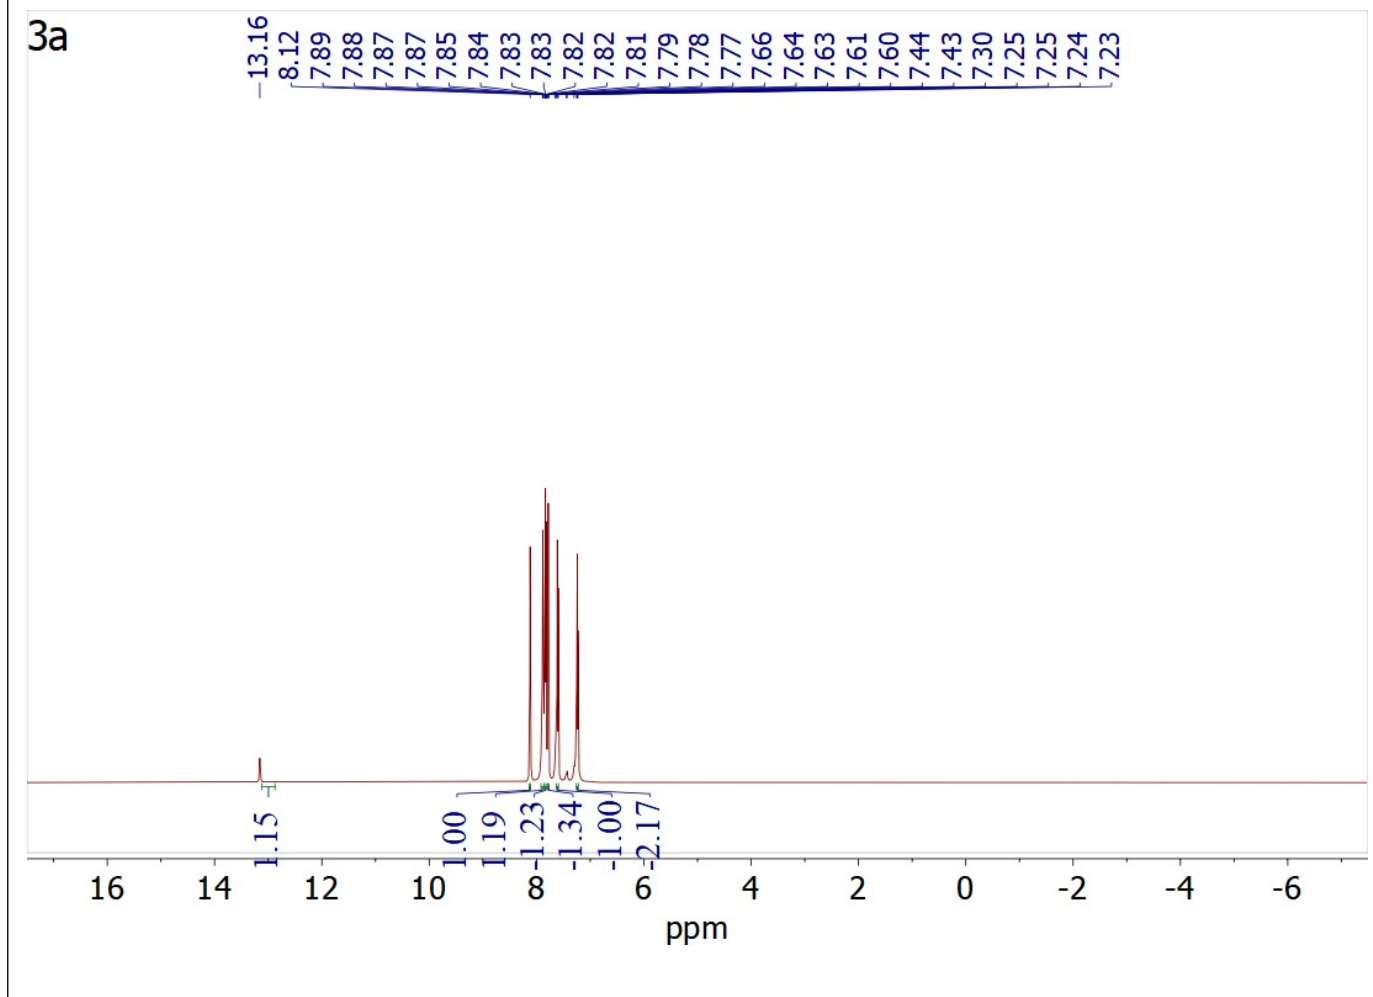

S2:  $^1\text{H}$  NMR spectrum of compound **4a** (400 MHz,  $\text{DMSO-}d_6$ )

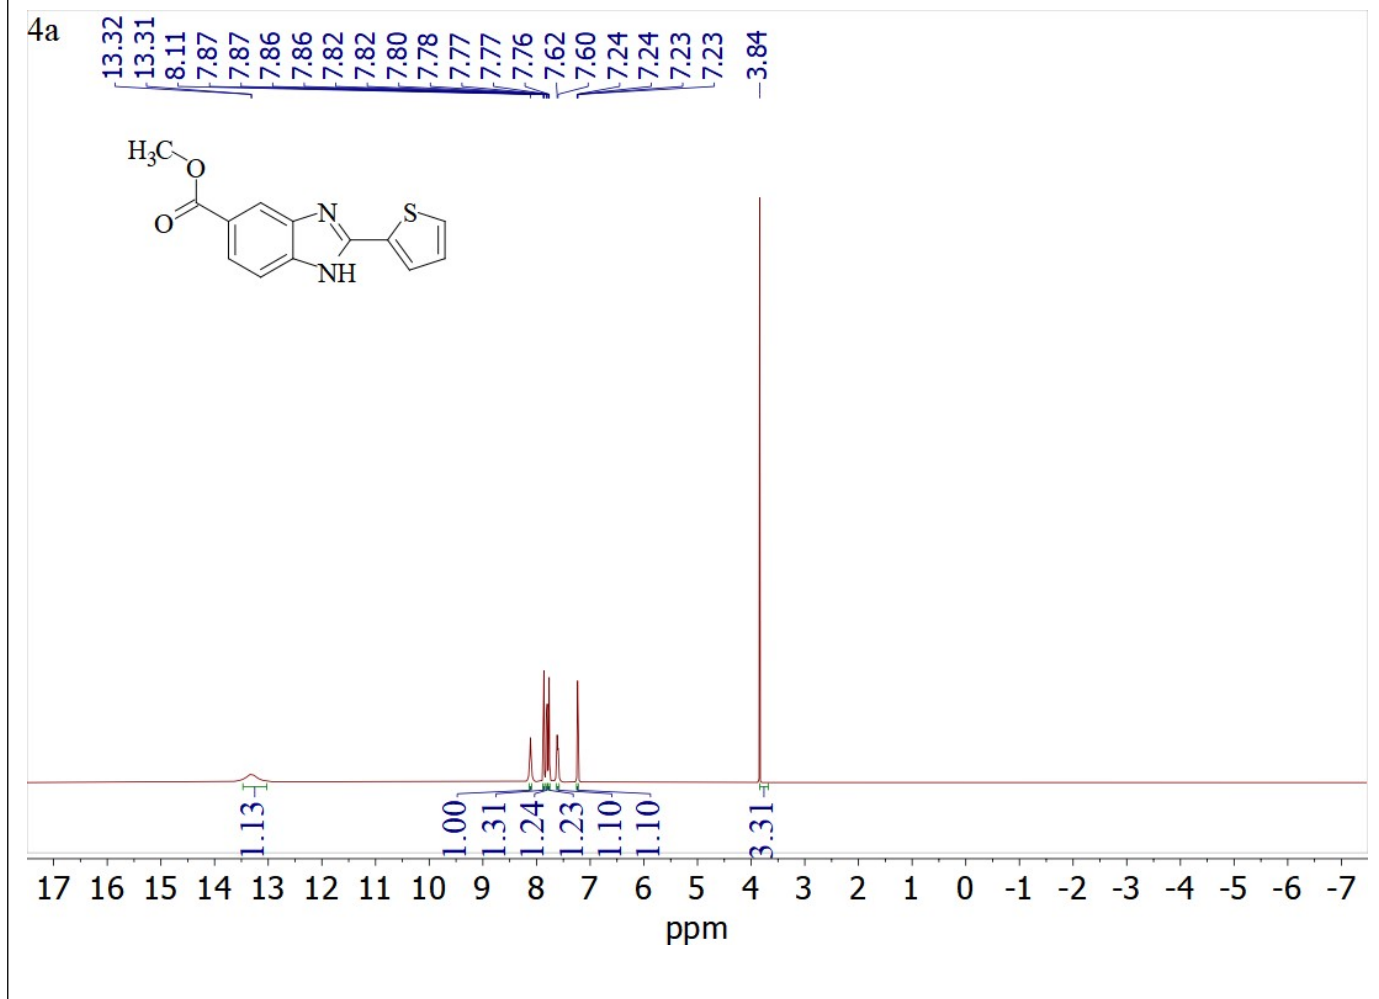

S3:<sup>1</sup>H NMR spectrum of compound **5a** (400 MHz, DMSO-*d*<sub>6</sub>)

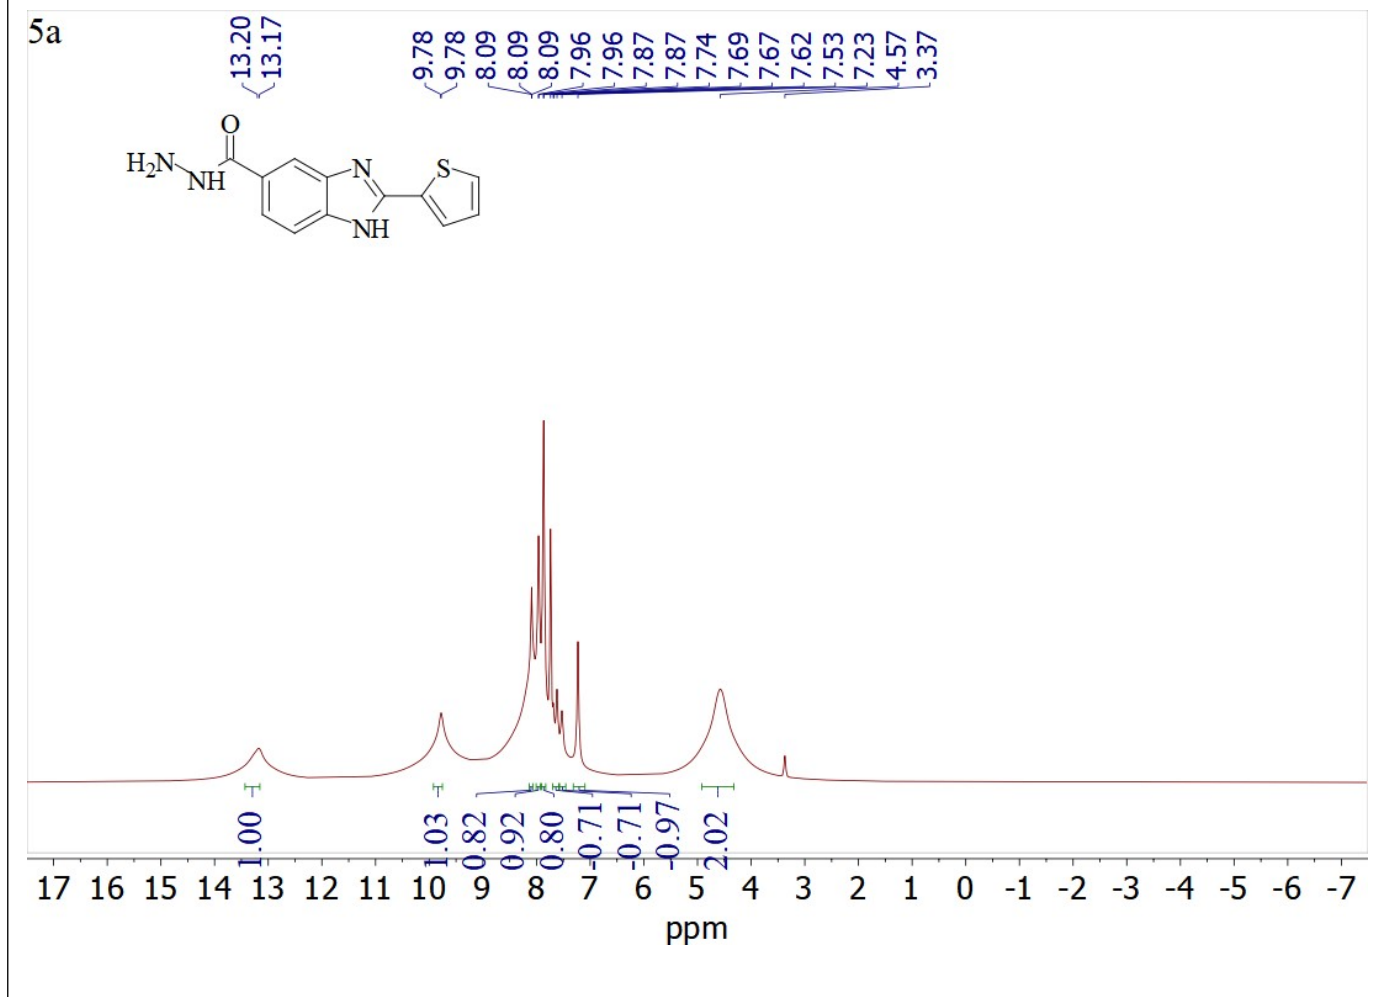

S4:<sup>1</sup>H NMR spectrum of compound **7a** (400 MHz, DMSO-*d*<sub>6</sub>)

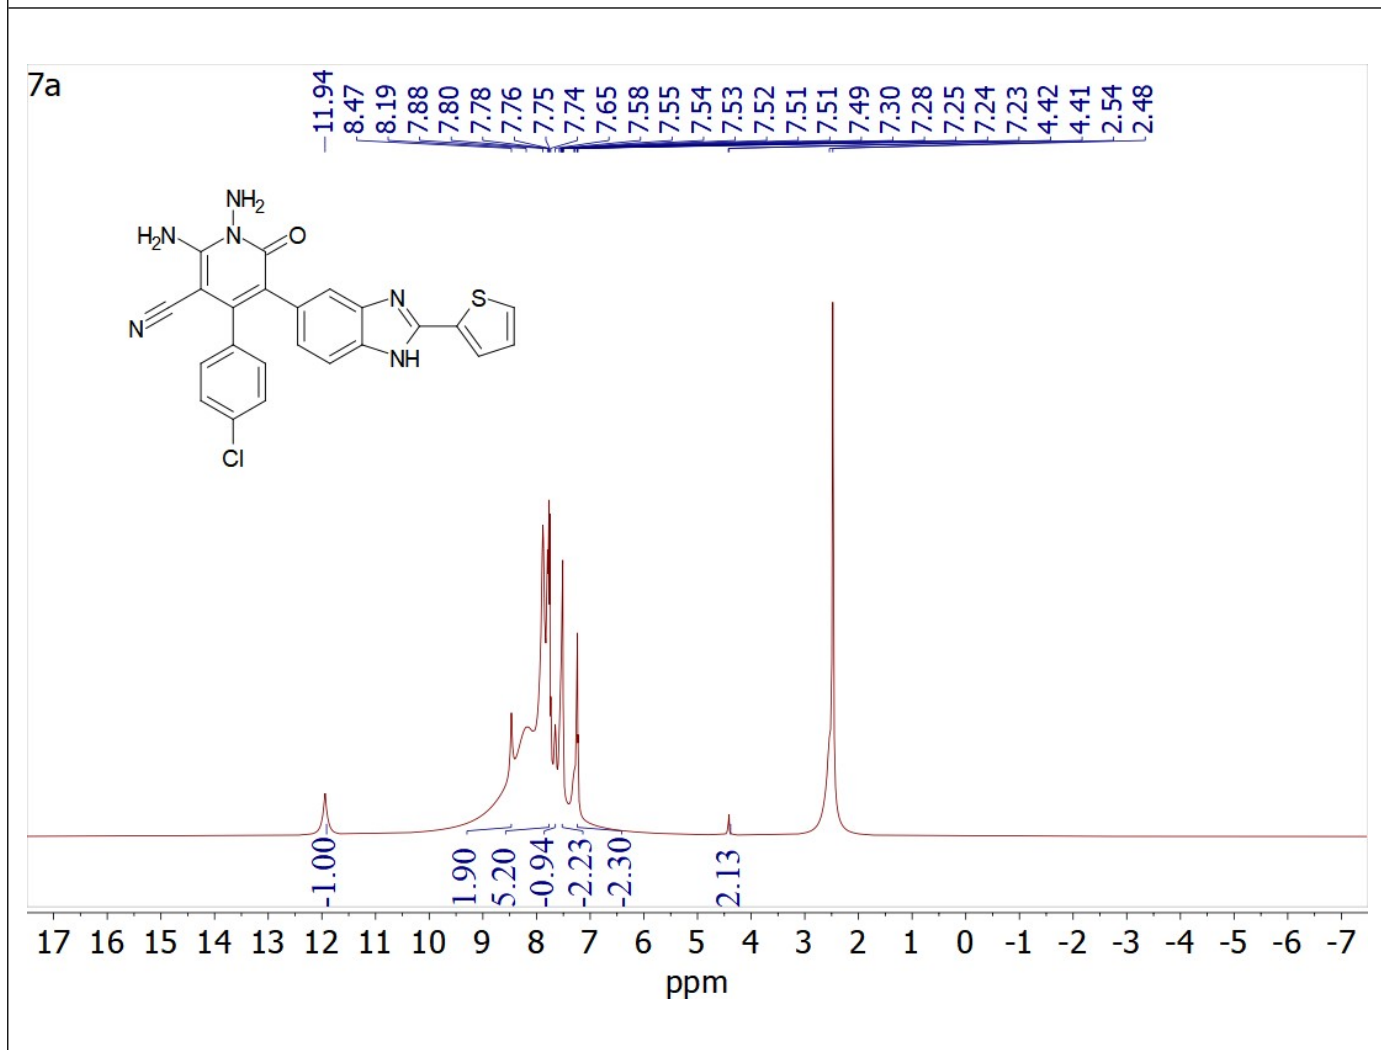

S5:  $^{13}\text{C}$  NMR spectrum of compound **7a** (100 MHz,  $\text{DMSO-}d_6$ )

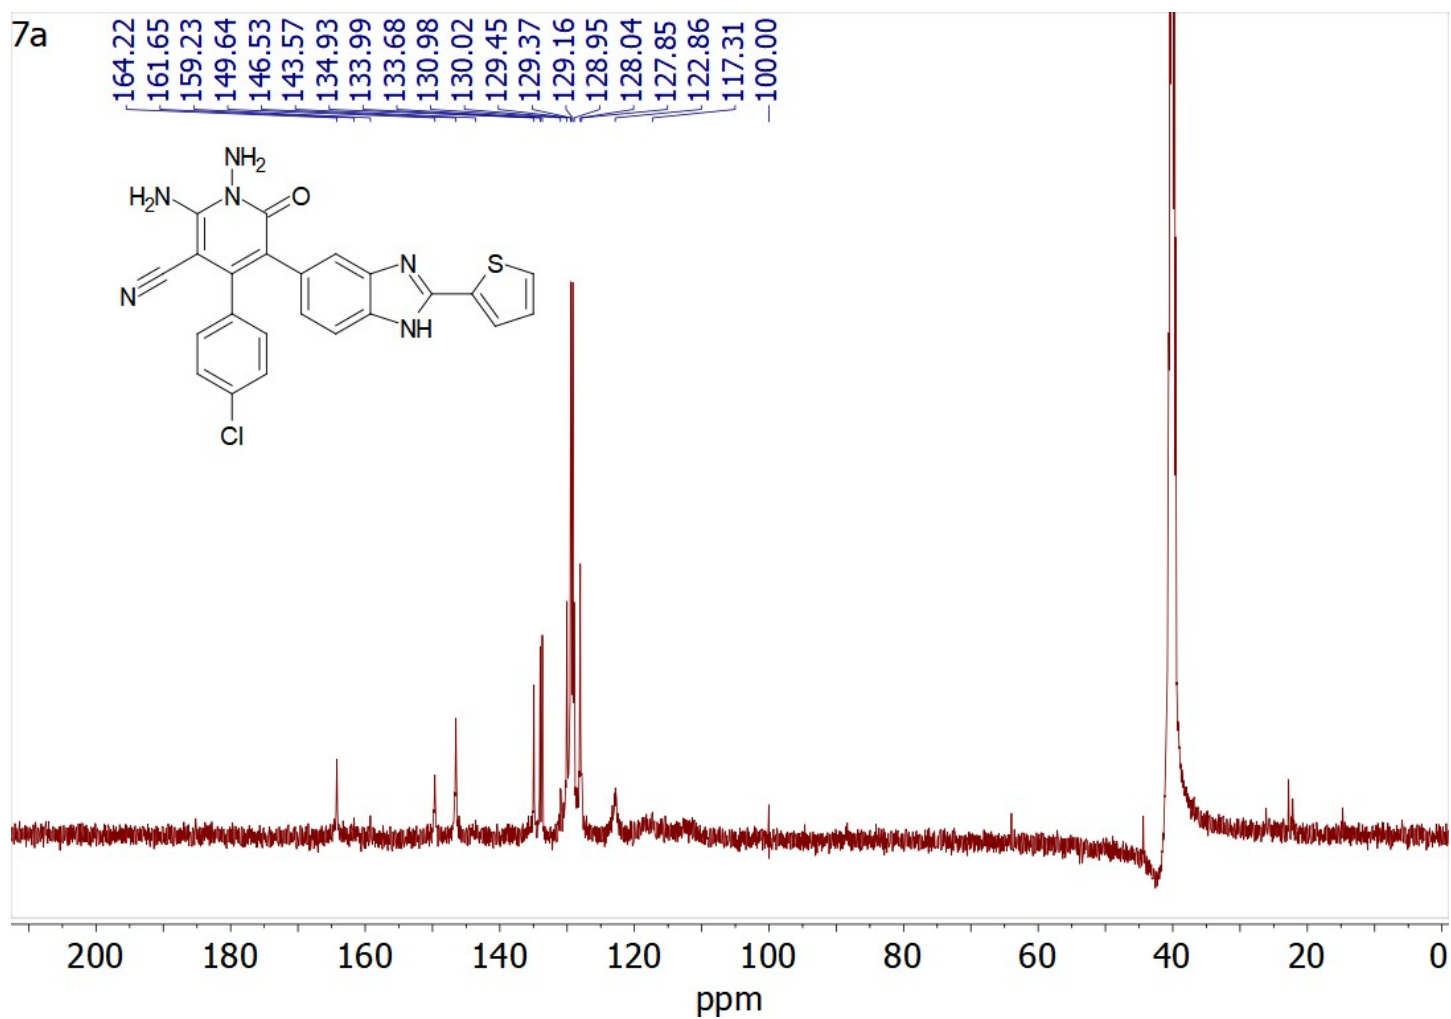

# S6: Mass spectrum of compound 7a

C:\Xcalibur\...EI-MS\2026\2\Hayam-5a

03/02/2026 11:41:21 AM

Hayam-5a #1368 RT: 4.68 AV: 1 NL: 2.56E3  
T: {0,0} + c EI Full ms [65.00-480.00]

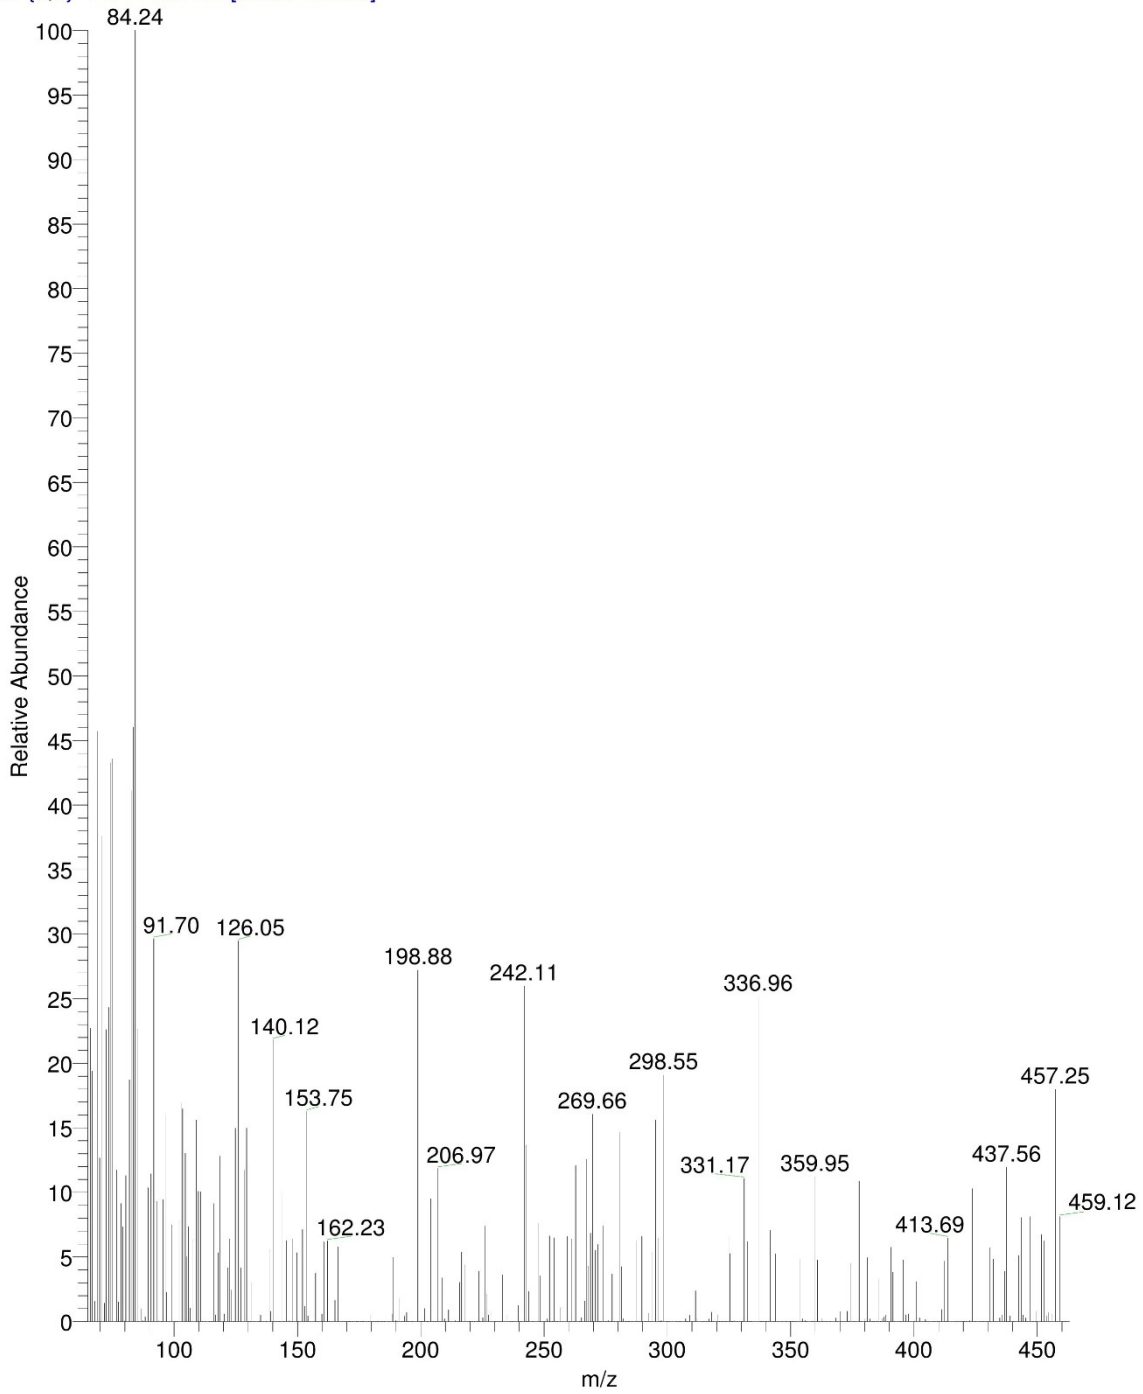

S7: <sup>1</sup>H NMR spectrum of compound **7b** (400 MHz, DMSO-*d*<sub>6</sub>)

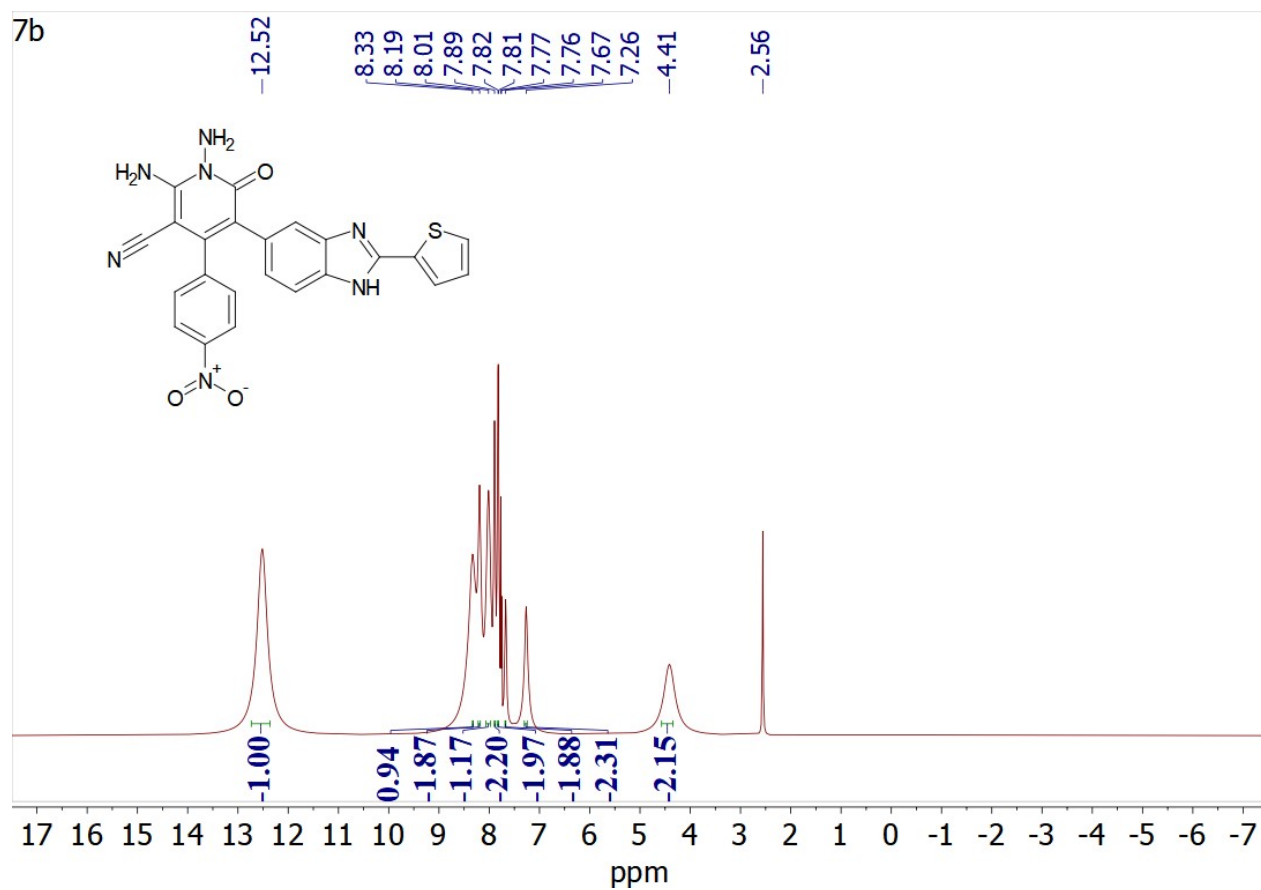

S8:  $^{13}\text{C}$  NMR spectrum of compound **7b** (100 MHz,  $\text{DMSO-}d_6$ )

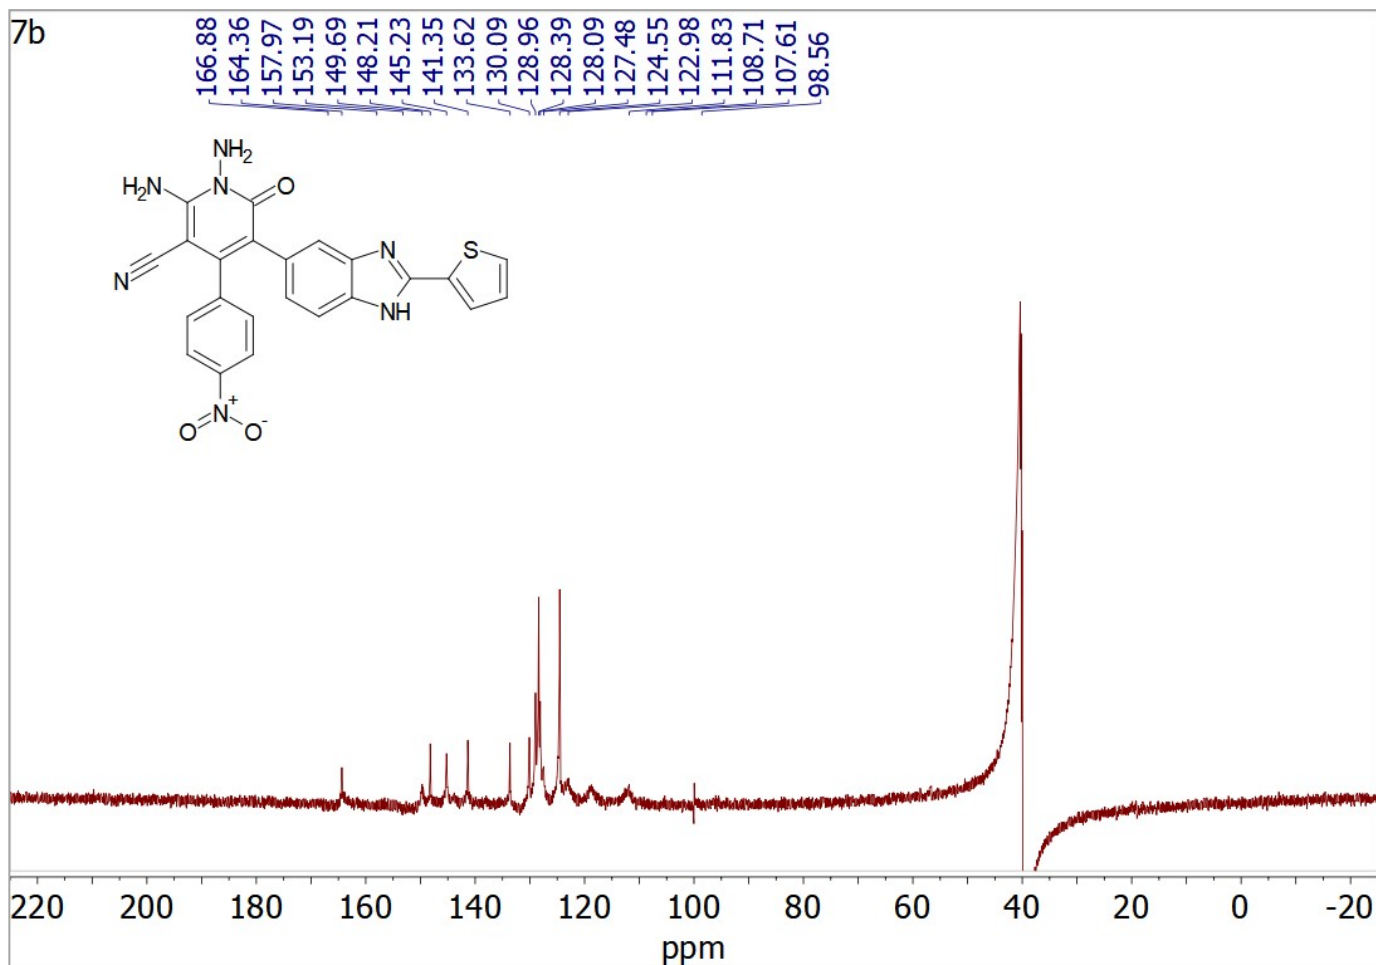

### S9: Mass spectrum of compound 7b

C:\Xcalibur...EI-MS\2026\2\Hayam-5b

03/02/2026 10:03:20 AM

Hayam-5b #32 RT: 0.14 AV: 1 NL: 1.19E4

T: {0,0} + c EI Full ms [65.00-500.00]

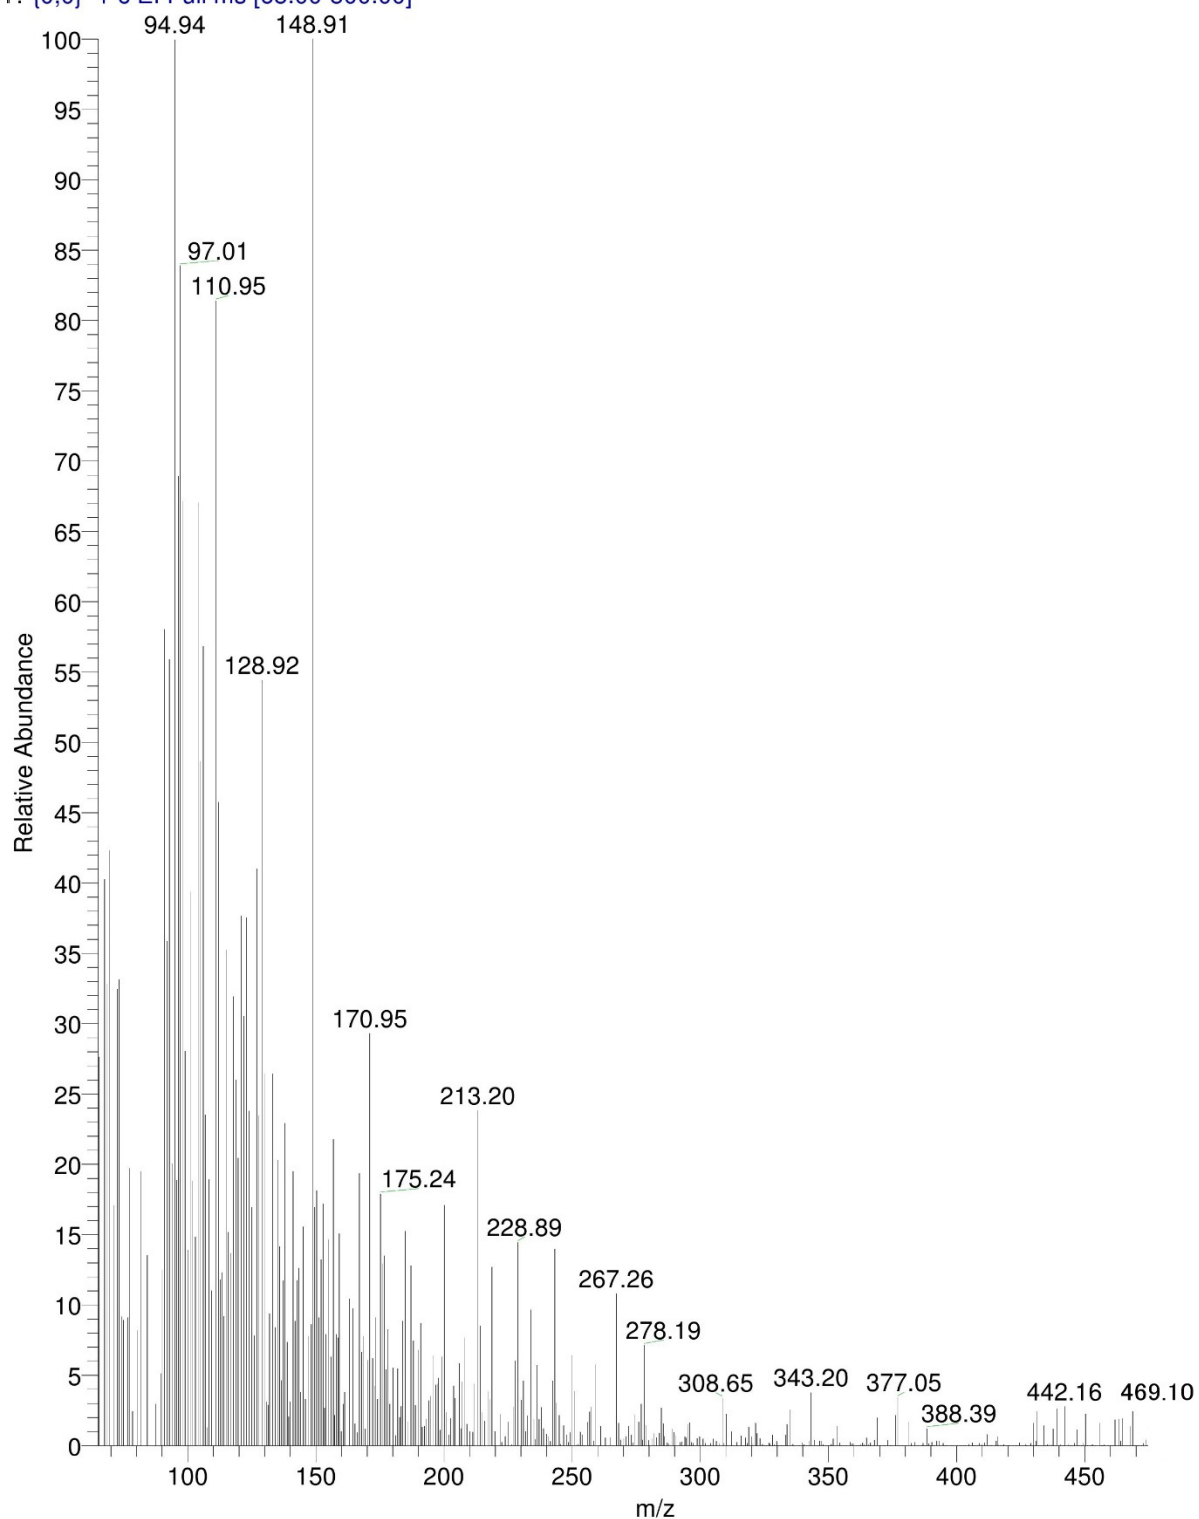

S10: <sup>1</sup>H NMR spectrum of compound **7c** (400 MHz, DMSO-*d*<sub>6</sub>)

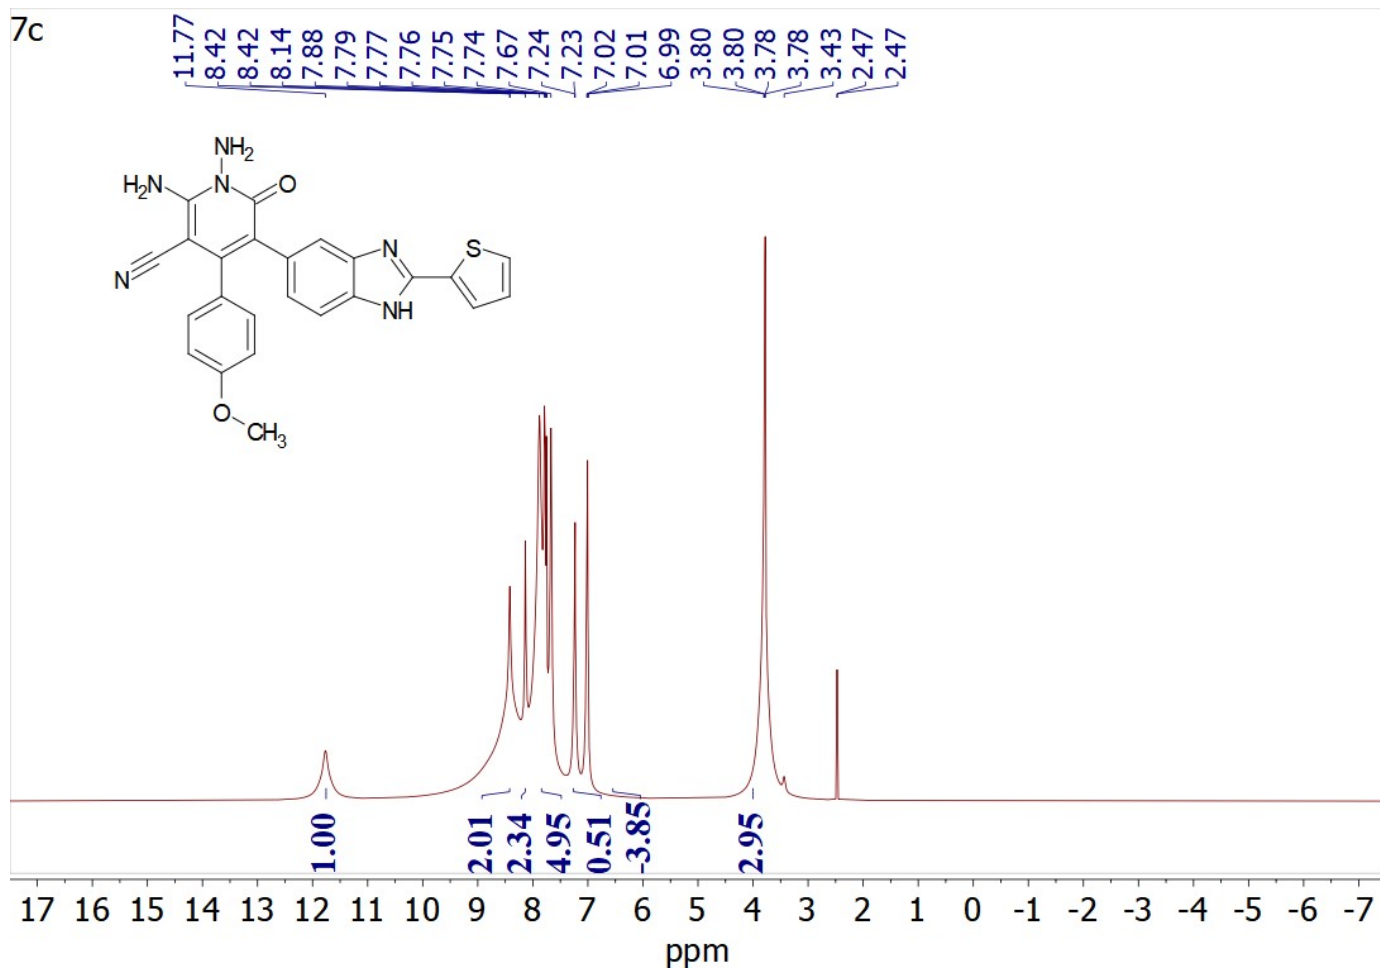

S11: <sup>13</sup>C NMR spectrum of compound **7c** (100 MHz, DMSO-*d*<sub>6</sub>)

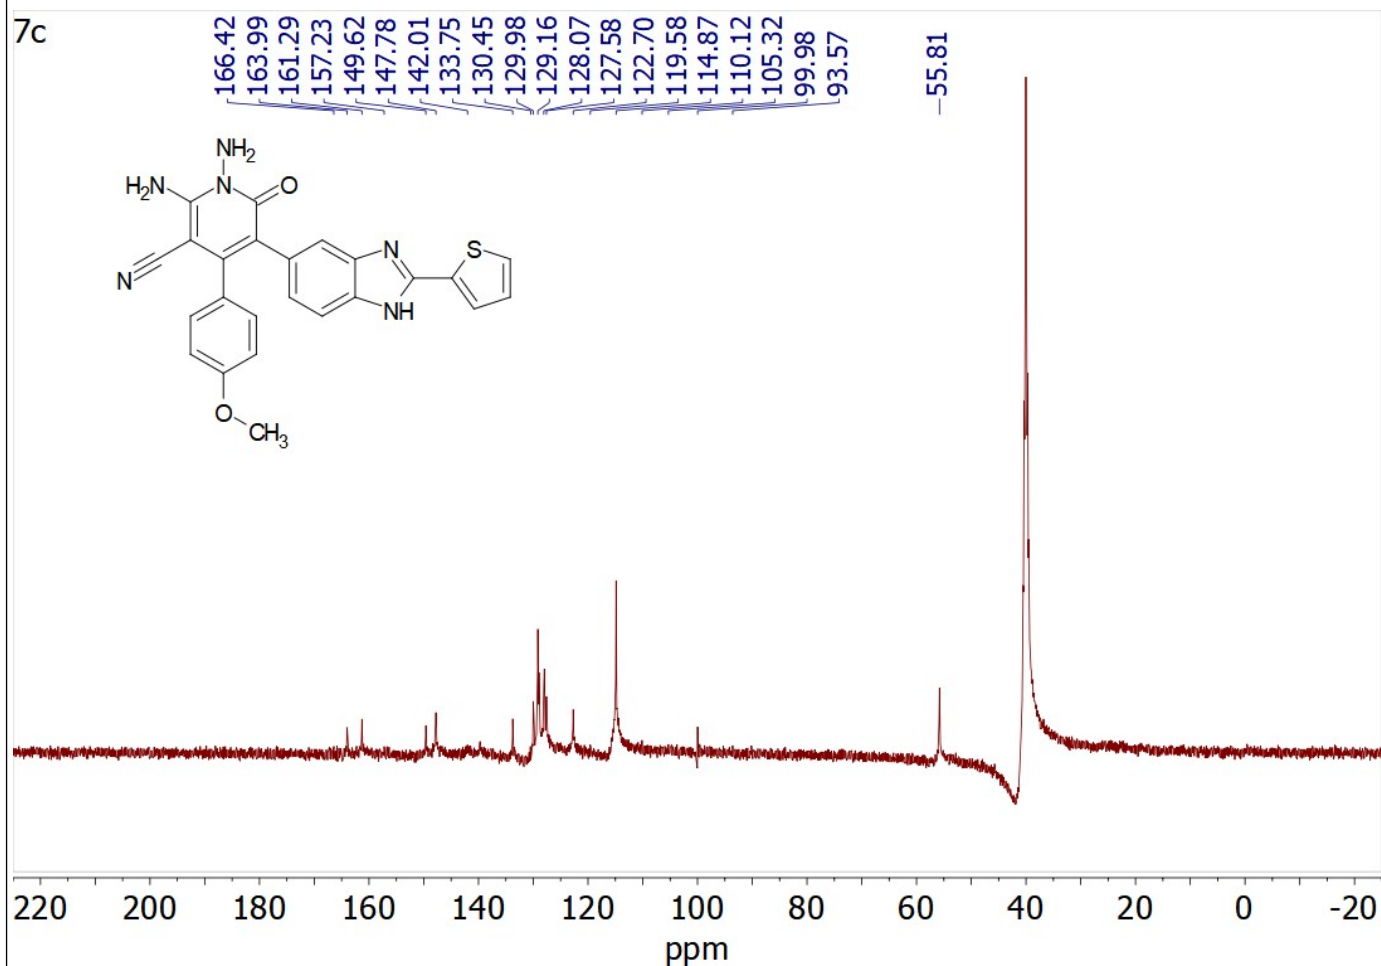

## S12: Mass spectrum of compound 7c

C:\Xcalibur\...EI-MS\2026\2\Hayam-5C

03/02/2026 11:00:28 AM

Hayam-5C #1366 RT: 4.68 AV: 1 NL: 1.13E4  
T: {0,0} + c EI Full ms [65.00-480.00]

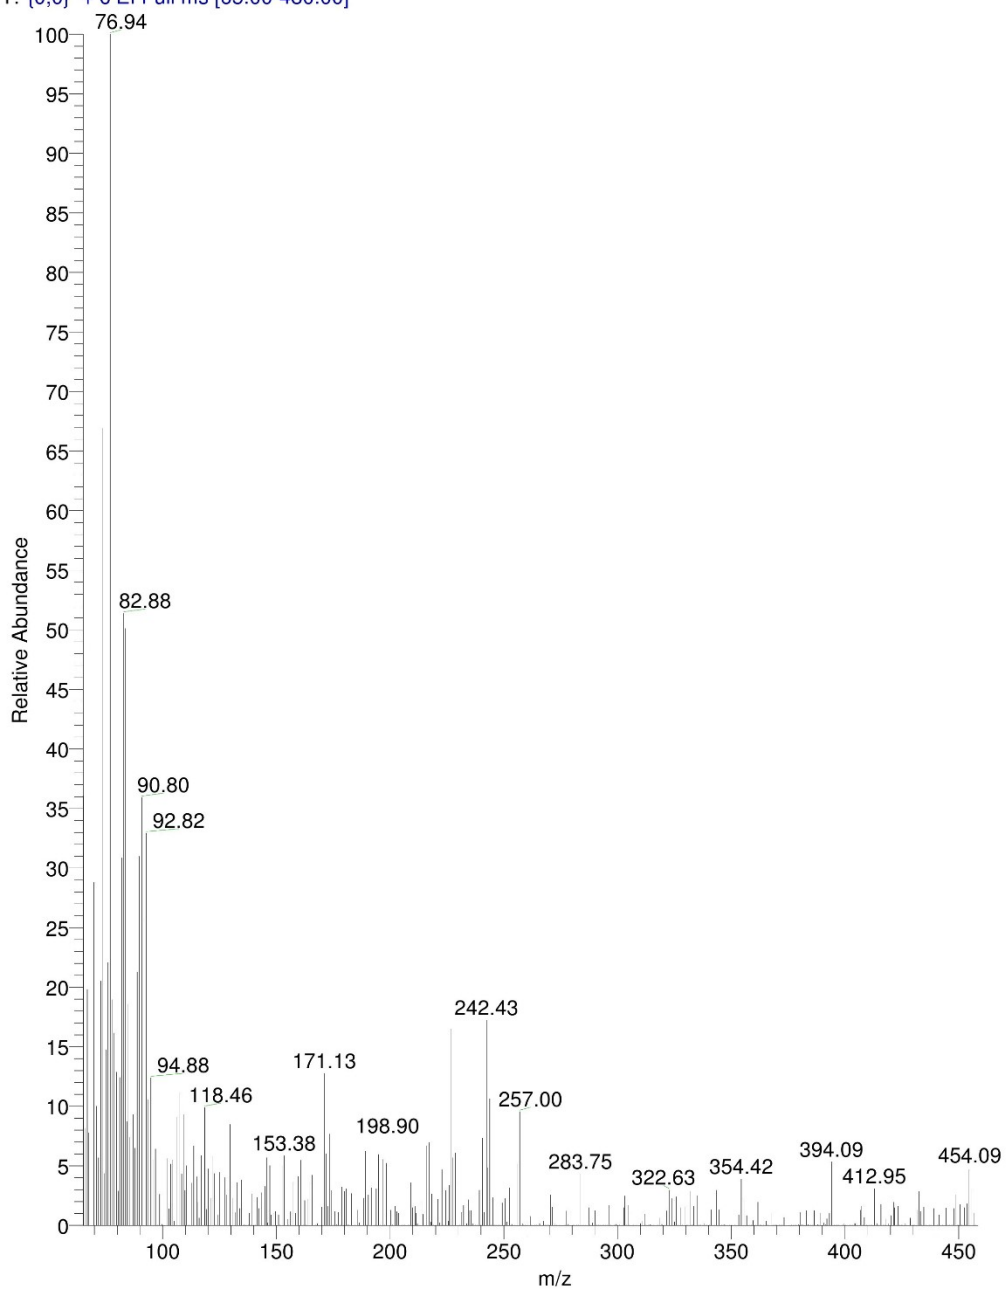

S13: <sup>1</sup>H NMR spectrum of compound 7d (400 MHz, DMSO-d<sub>6</sub>)

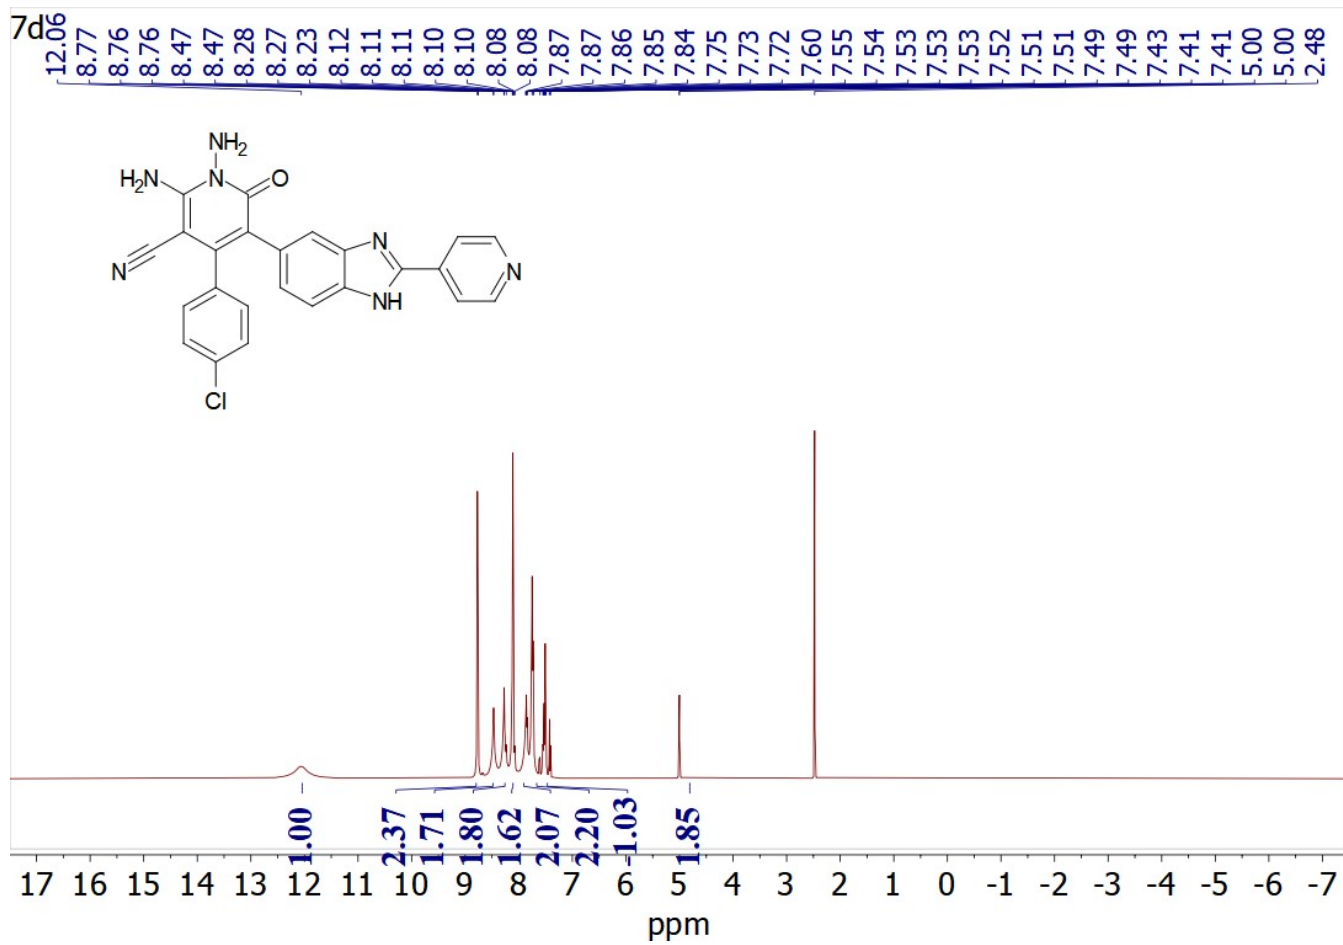

**S14:  $^{13}\text{C}$  NMR spectrum of compound 7d (100 MHz, DMSO-*d*<sub>6</sub>)**

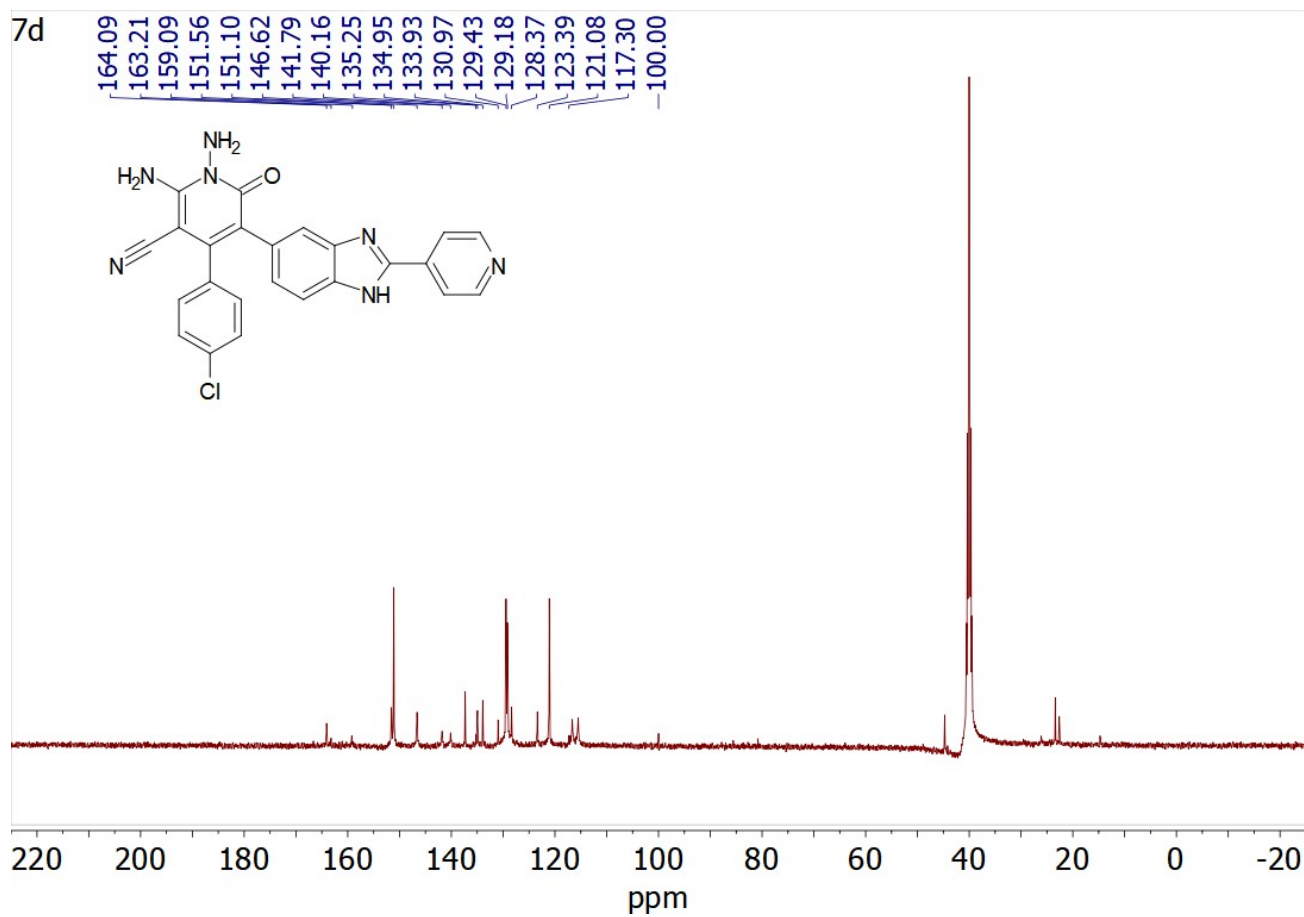

# S15: Mass spectrum of compound **7d**

C:\Xcalibur\...EI-MS\2026\2\Hayam-5d

03/02/2026 10:12:05 AM

Hayam-5d #1371 RT: 4.69 AV: 1 NL: 2.59E4

T: {0,0} + c EI Full ms [65.00-500.00]

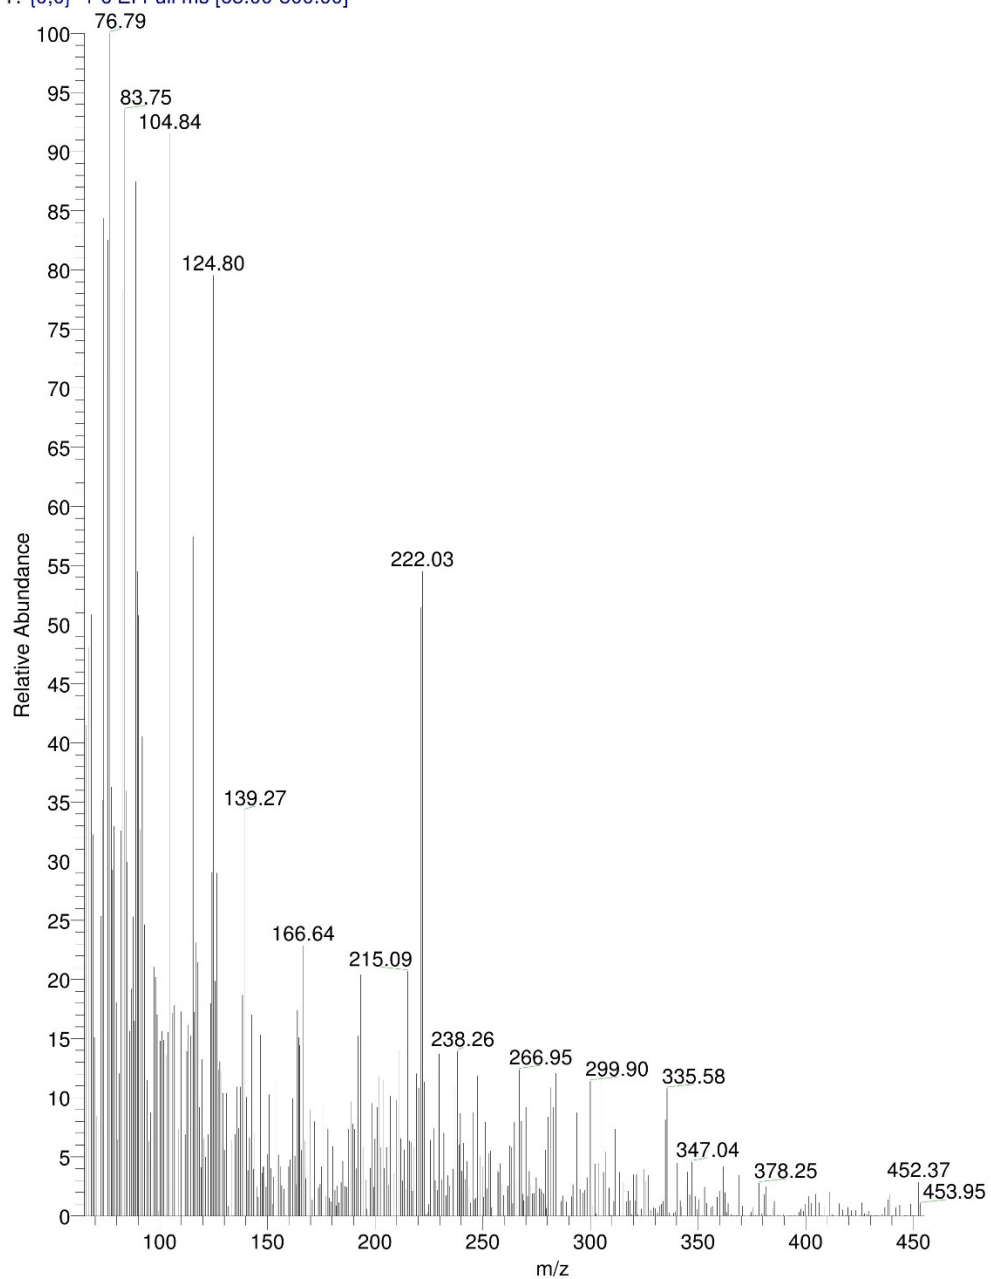

S16: <sup>1</sup>H NMR spectrum of compound 7e (500 MHz, DMSO-d<sub>6</sub>)

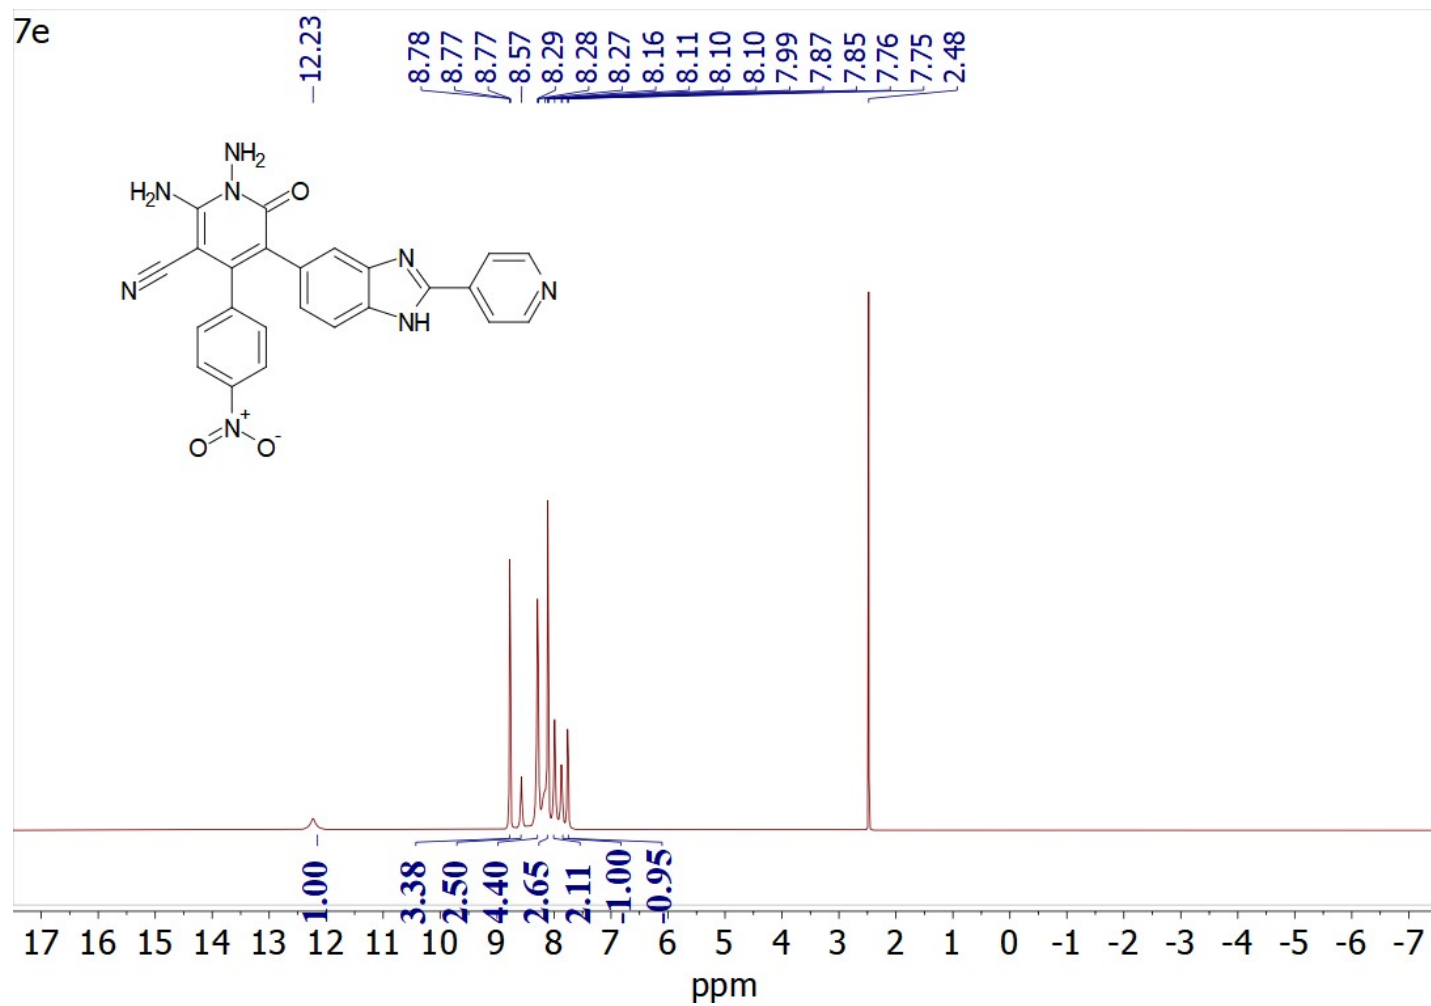

S17: <sup>13</sup>C NMR spectrum of compound 7e (125 MHz, DMSO-*d*<sub>6</sub>)

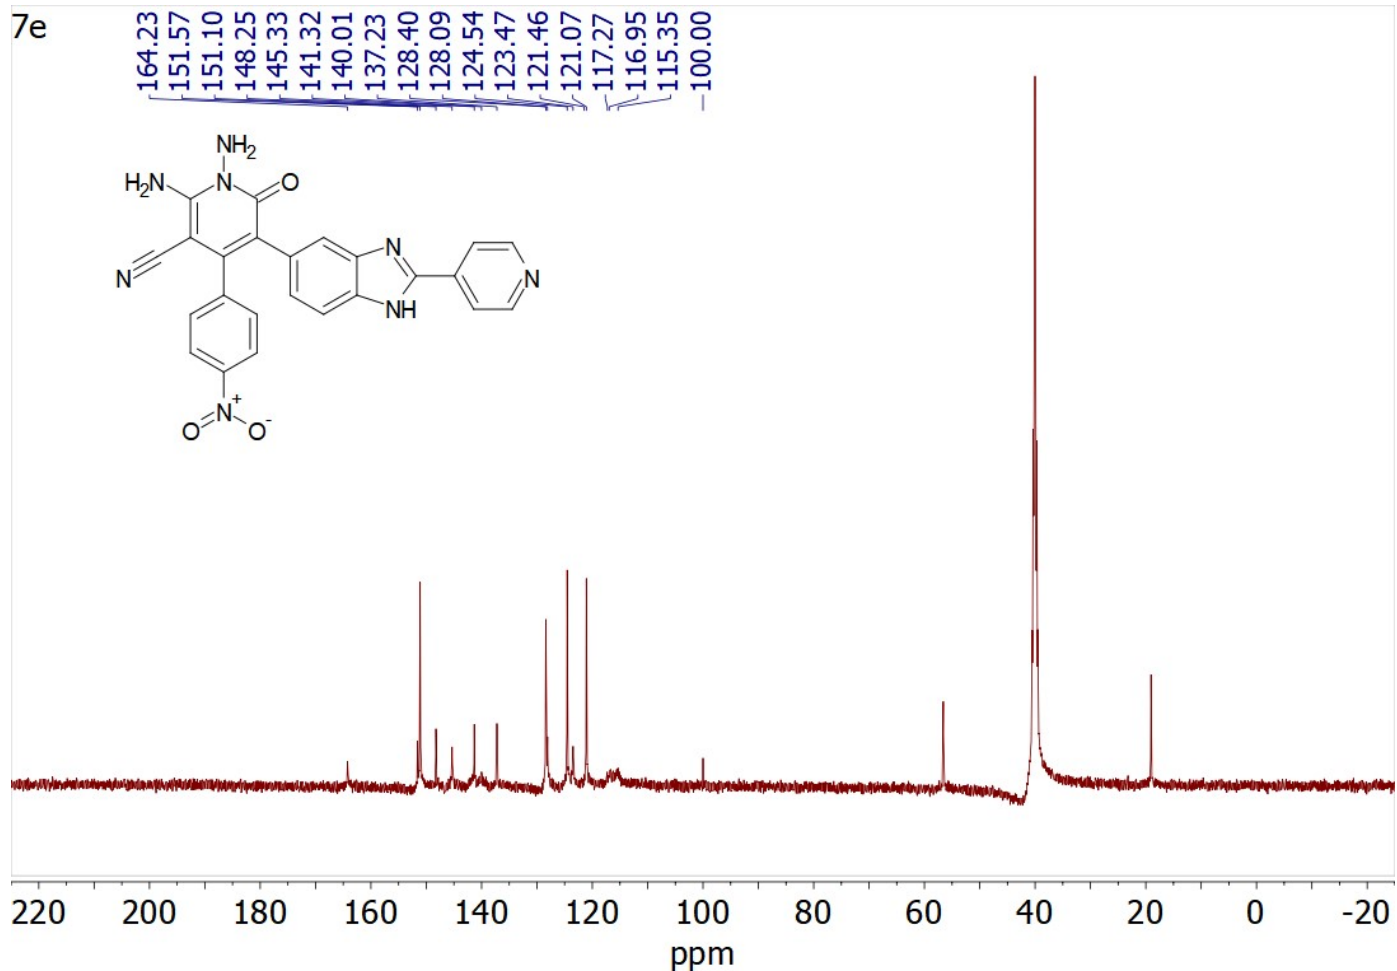

### S18: Mass spectrum of compound 7e

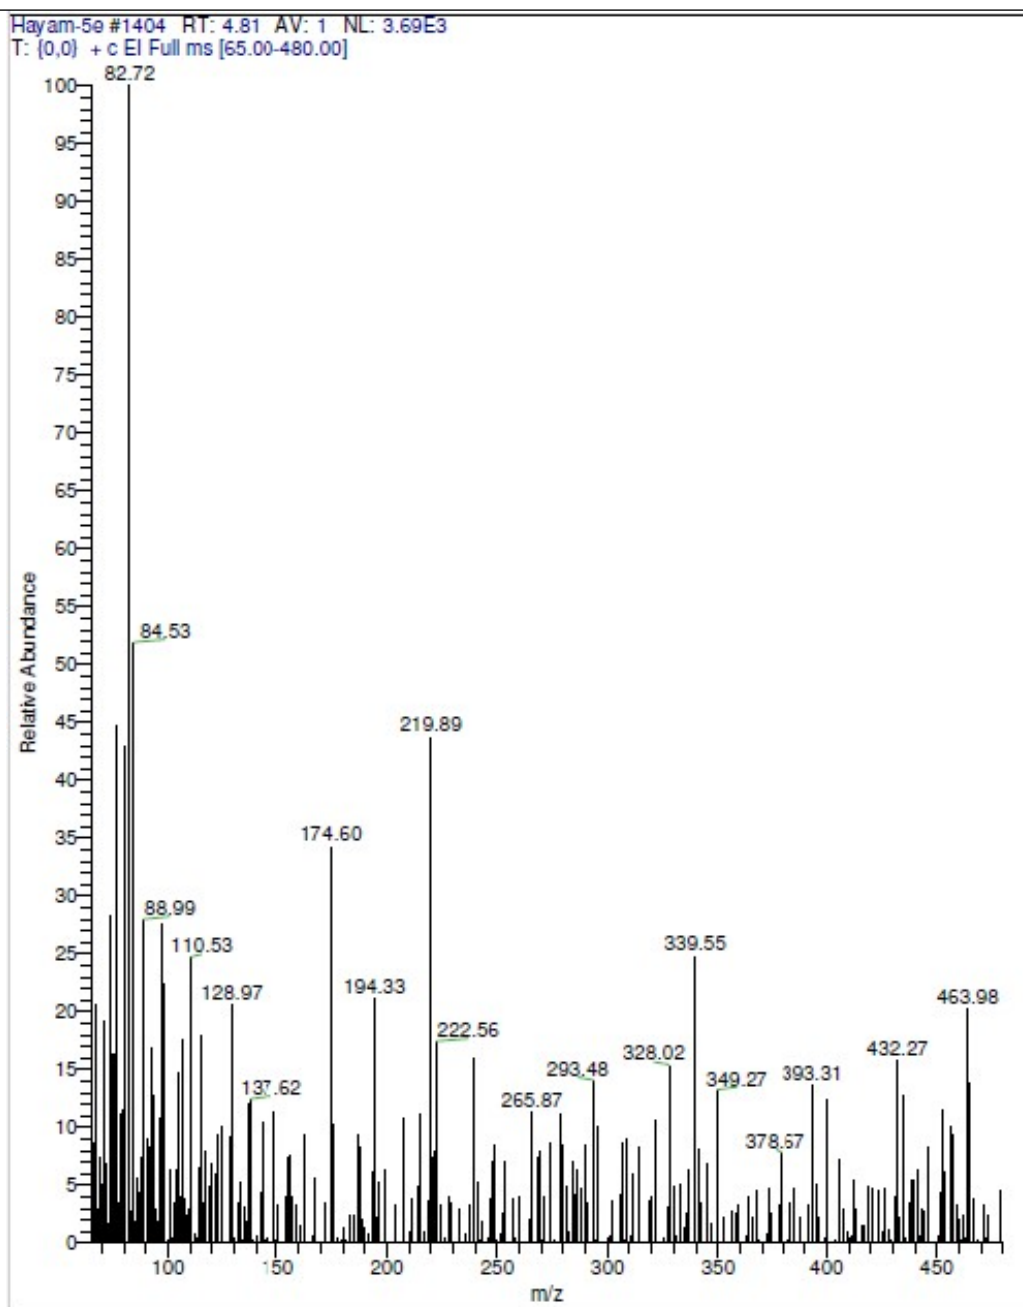

S19: <sup>1</sup>H NMR spectrum of compound **7f** (400 MHz, DMSO-*d*<sub>6</sub>)

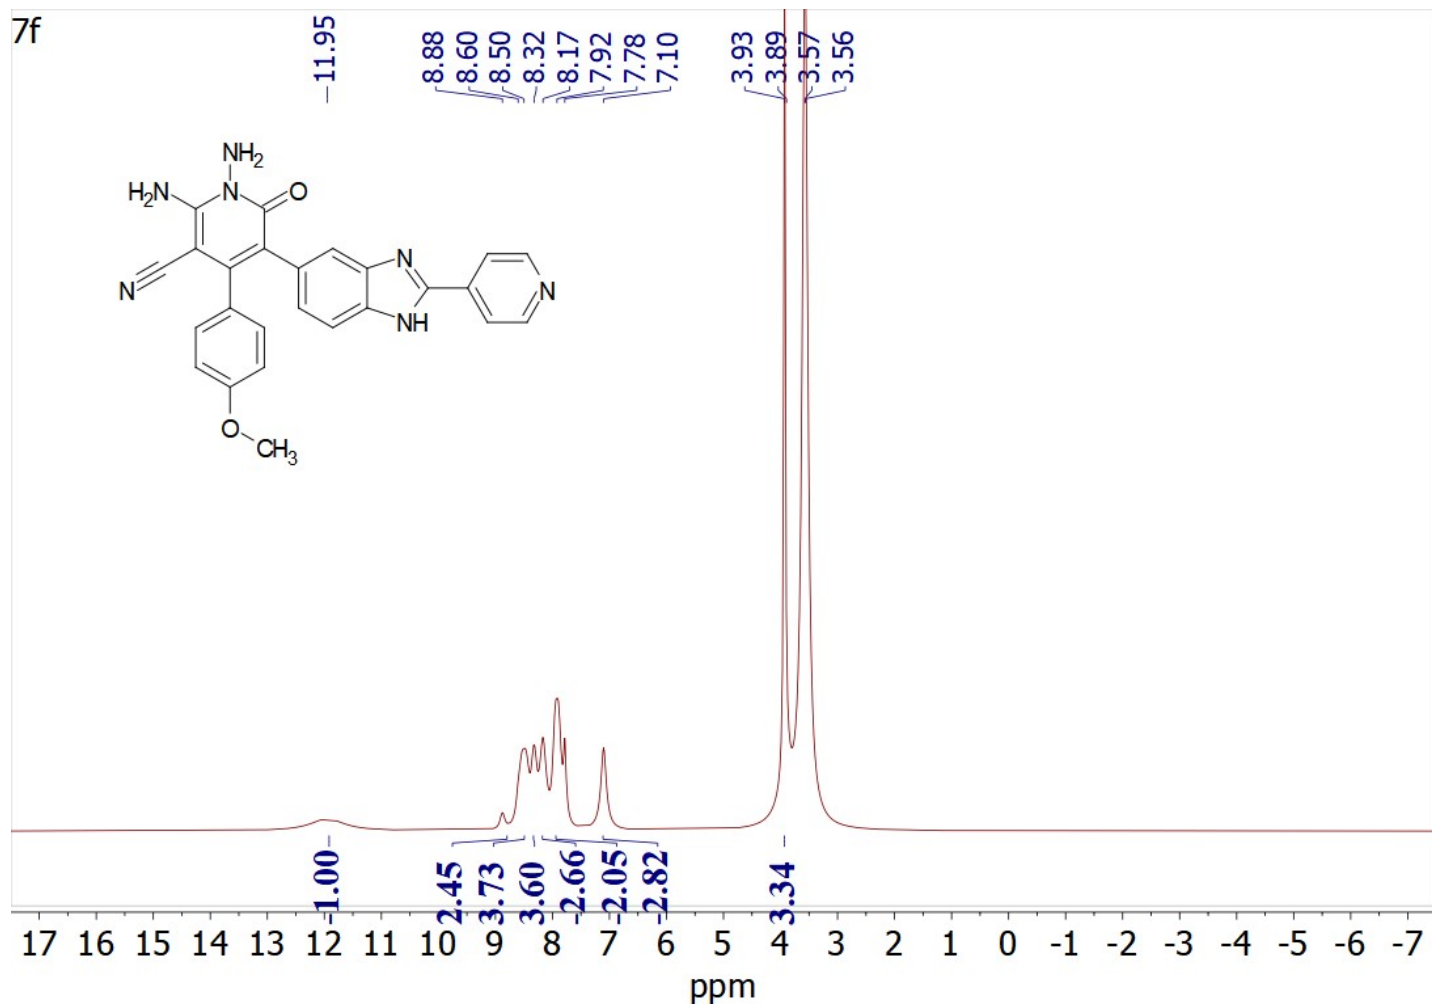

S20: <sup>13</sup>C NMR spectrum of compound 7f (100 MHz, DMSO-d<sub>6</sub>)

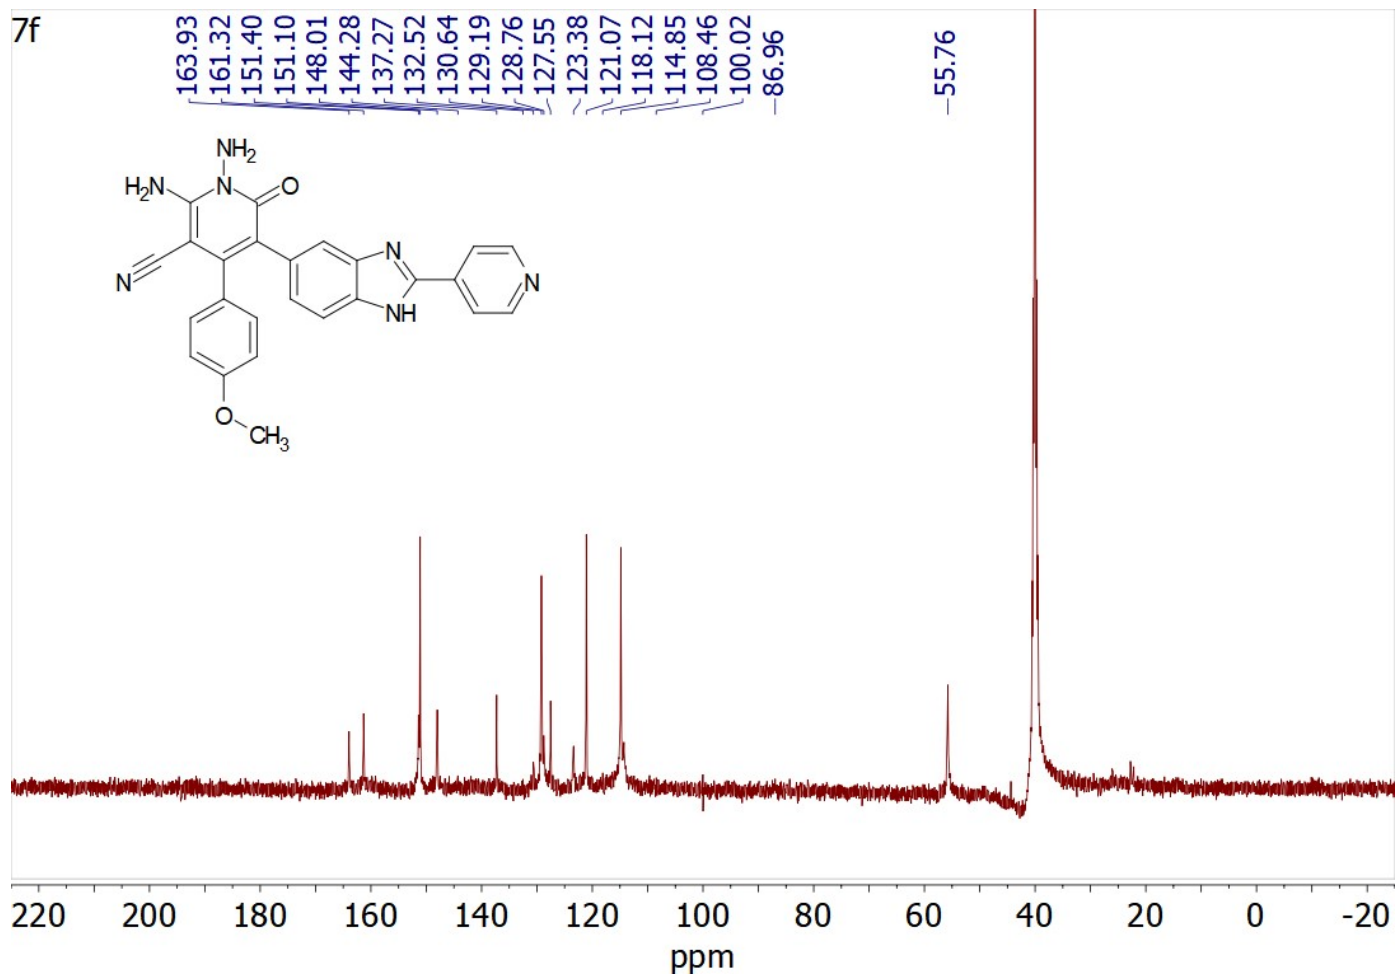

# S21: Mass spectrum of compound 7f

C:\Xcalibur\...EI-MS\2026\2\Hayam-5F

03/02/2026 11:52:57 AM

Hayam-5F #1424 RT: 4.87 AV: 1 NL: 5.68E3  
T: {0,0} + c EI Full ms [65.00-480.00]

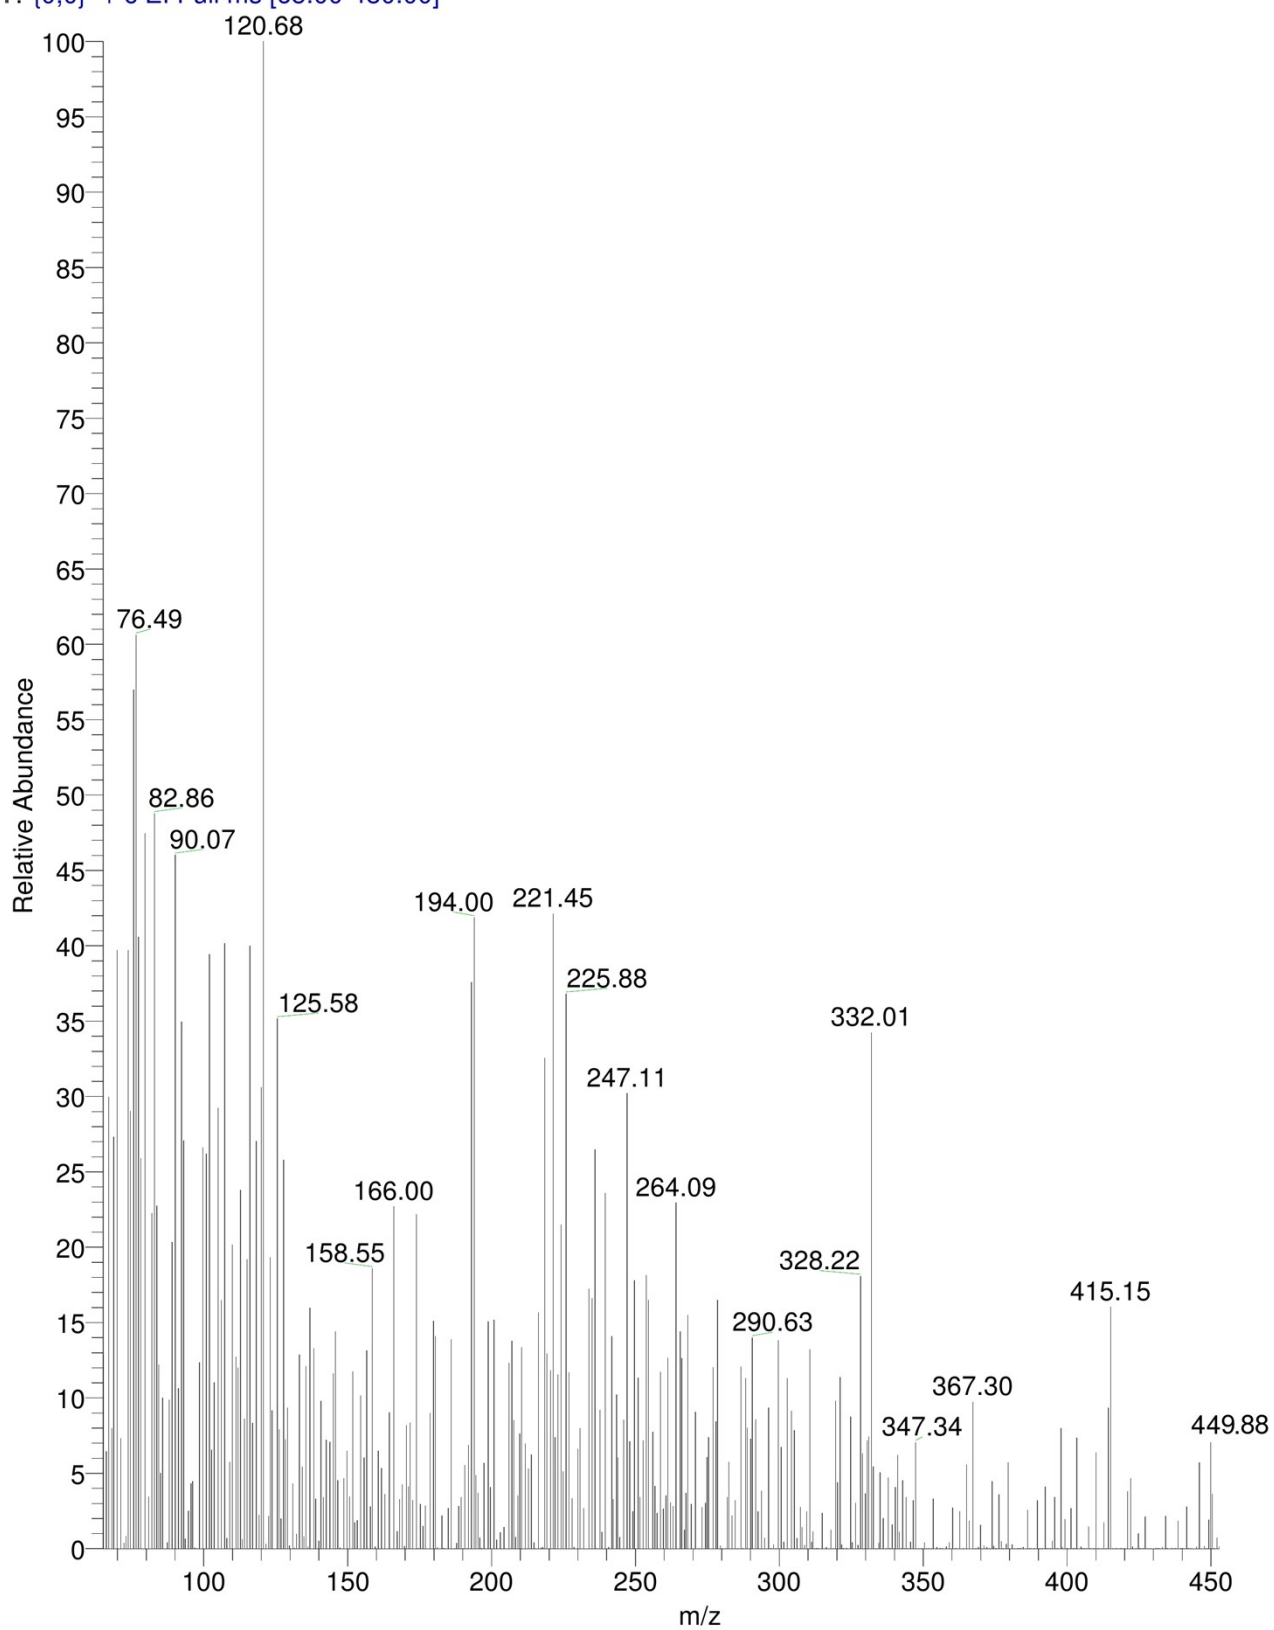

S22: <sup>1</sup>H NMR spectrum of compound **8a** (400 MHz, DMSO-*d*<sub>6</sub>)

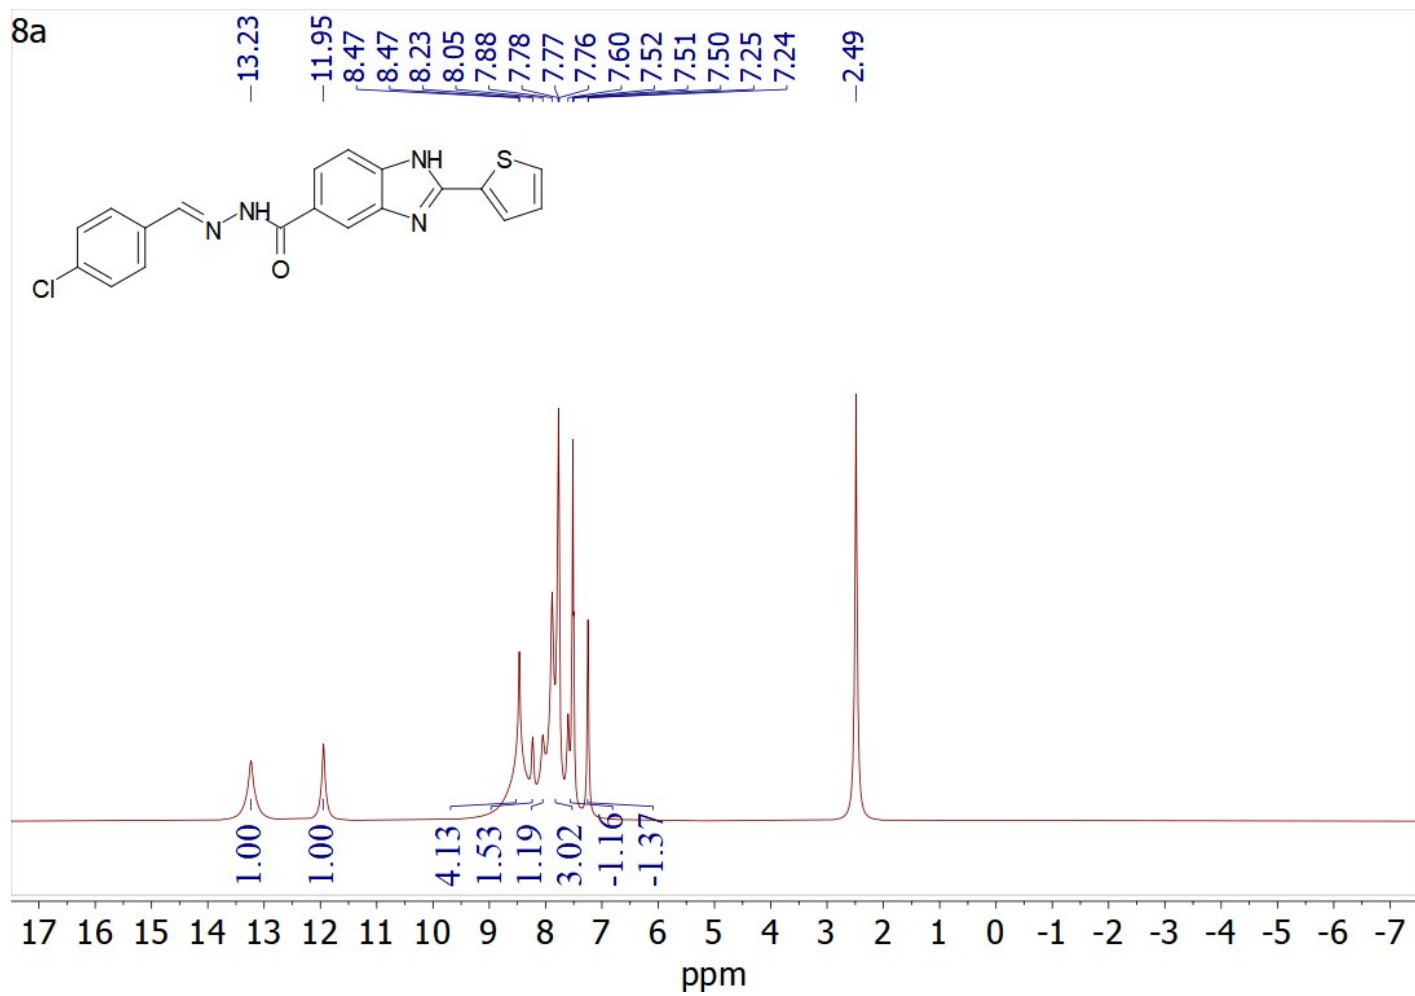

S23:  $^{13}\text{C}$  NMR spectrum of compound **8a** (100 MHz,  $\text{DMSO-}d_6$ )

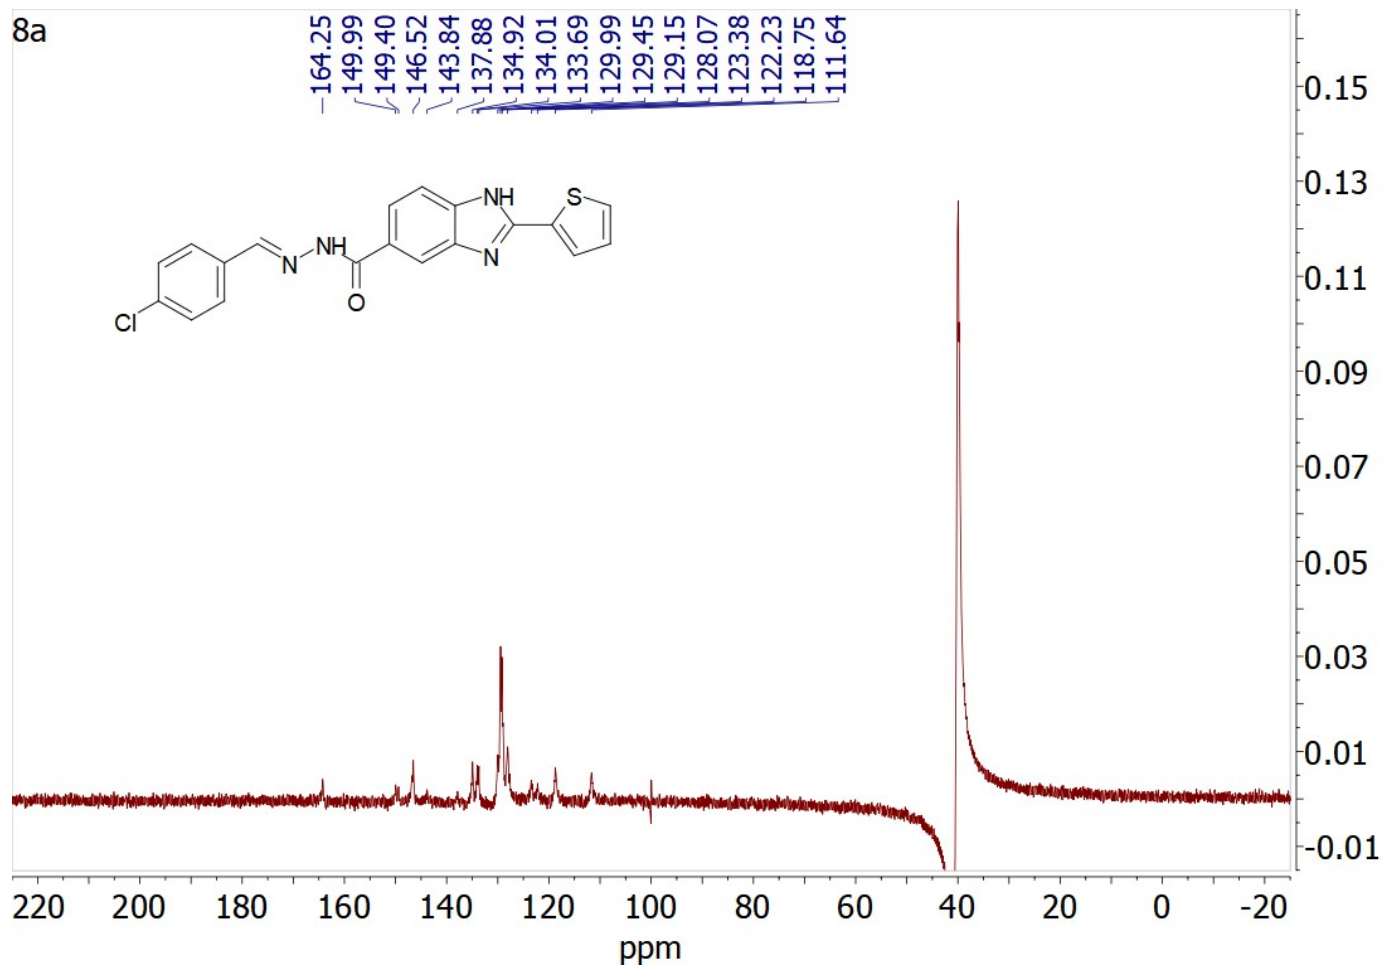

## S24: Mass spectrum of compound **8a**

C:\Xcalibur...EI-MS\2026\2\Hayam-6a

03/02/2026 11:31:54 AM

Hayam-6a #1396 RT: 4.78 AV: 1 NL: 3.44E3

T: (0,0) + c EI Full ms [65.00-400.00]

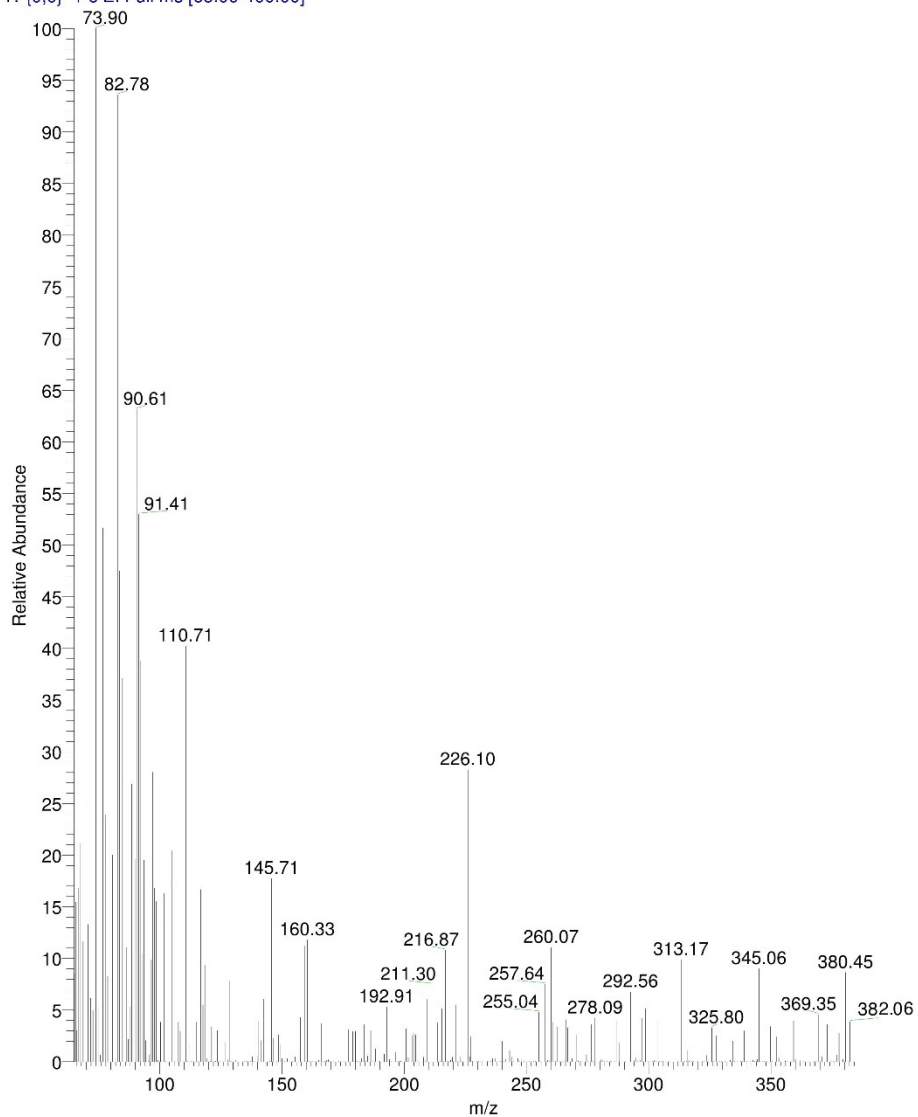

S25: <sup>1</sup>H NMR spectrum of compound **8b** (400 MHz, DMSO-*d*<sub>6</sub>)

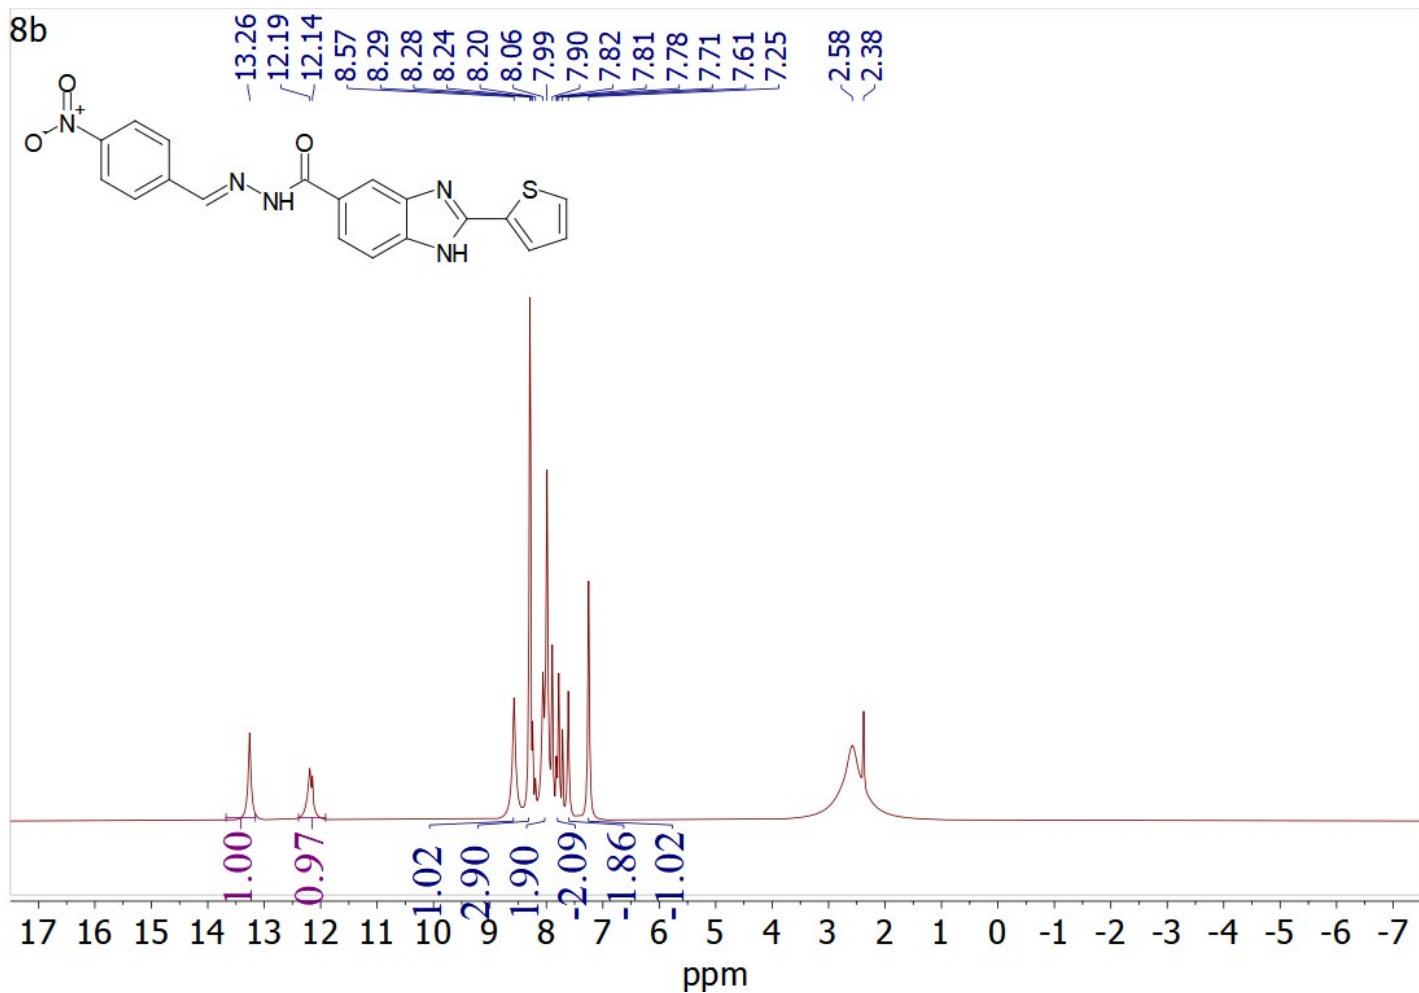

S26:  $^{13}\text{C}$  NMR spectrum of compound **8b** (100 MHz,  $\text{DMSO-}d_6$ )

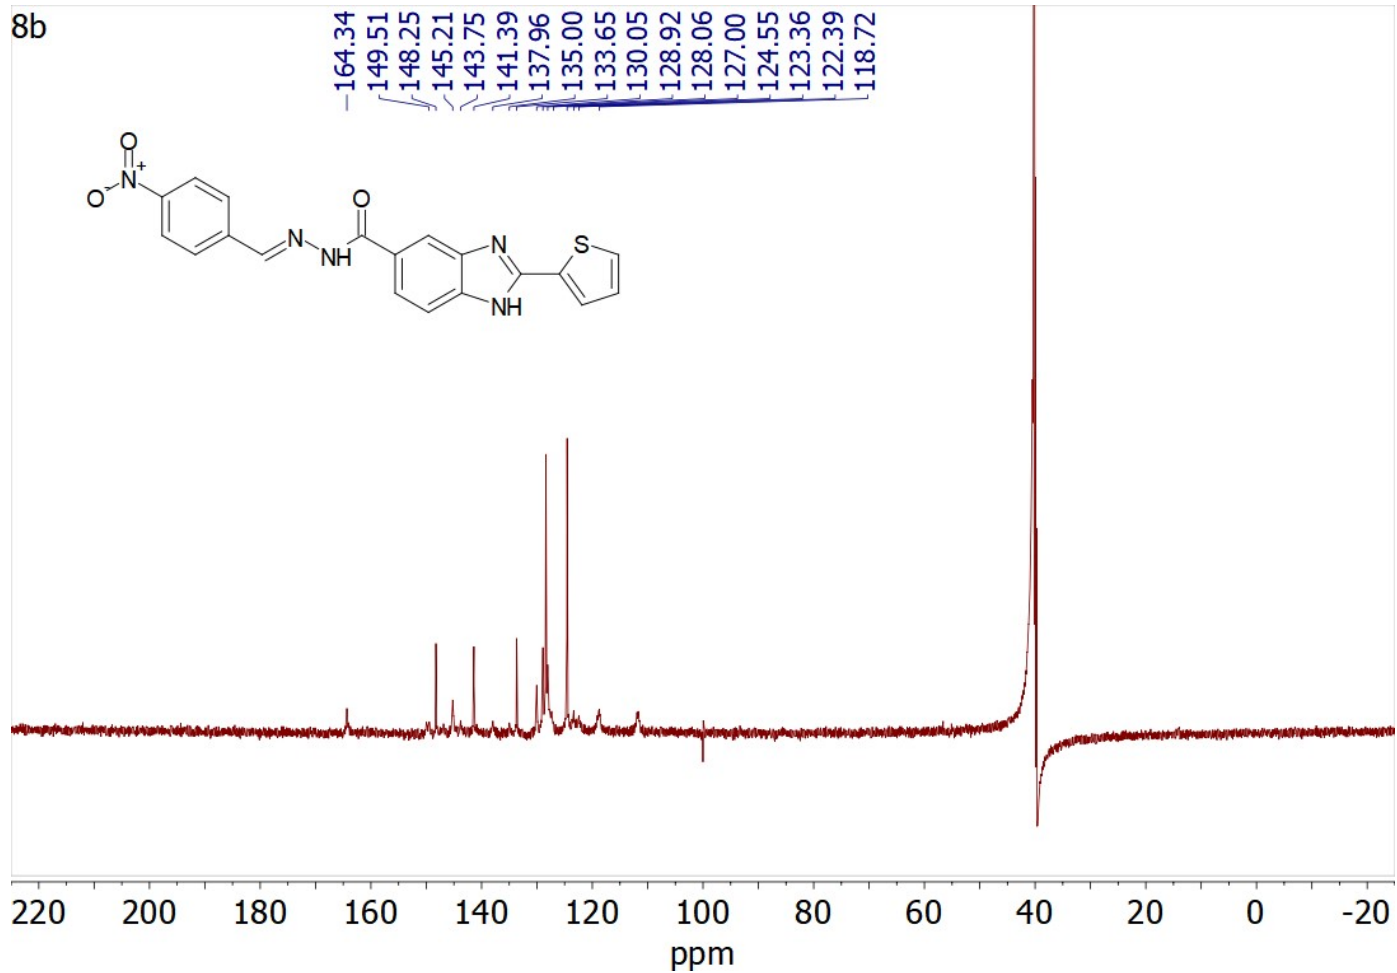

### S27: Mass spectrum of compound **8b**

Hayam-6b #992 RT: 3.40 AV: 1 NL: 5.20E3  
T: [0,0] + c EI Full ms [65.00-400.00]

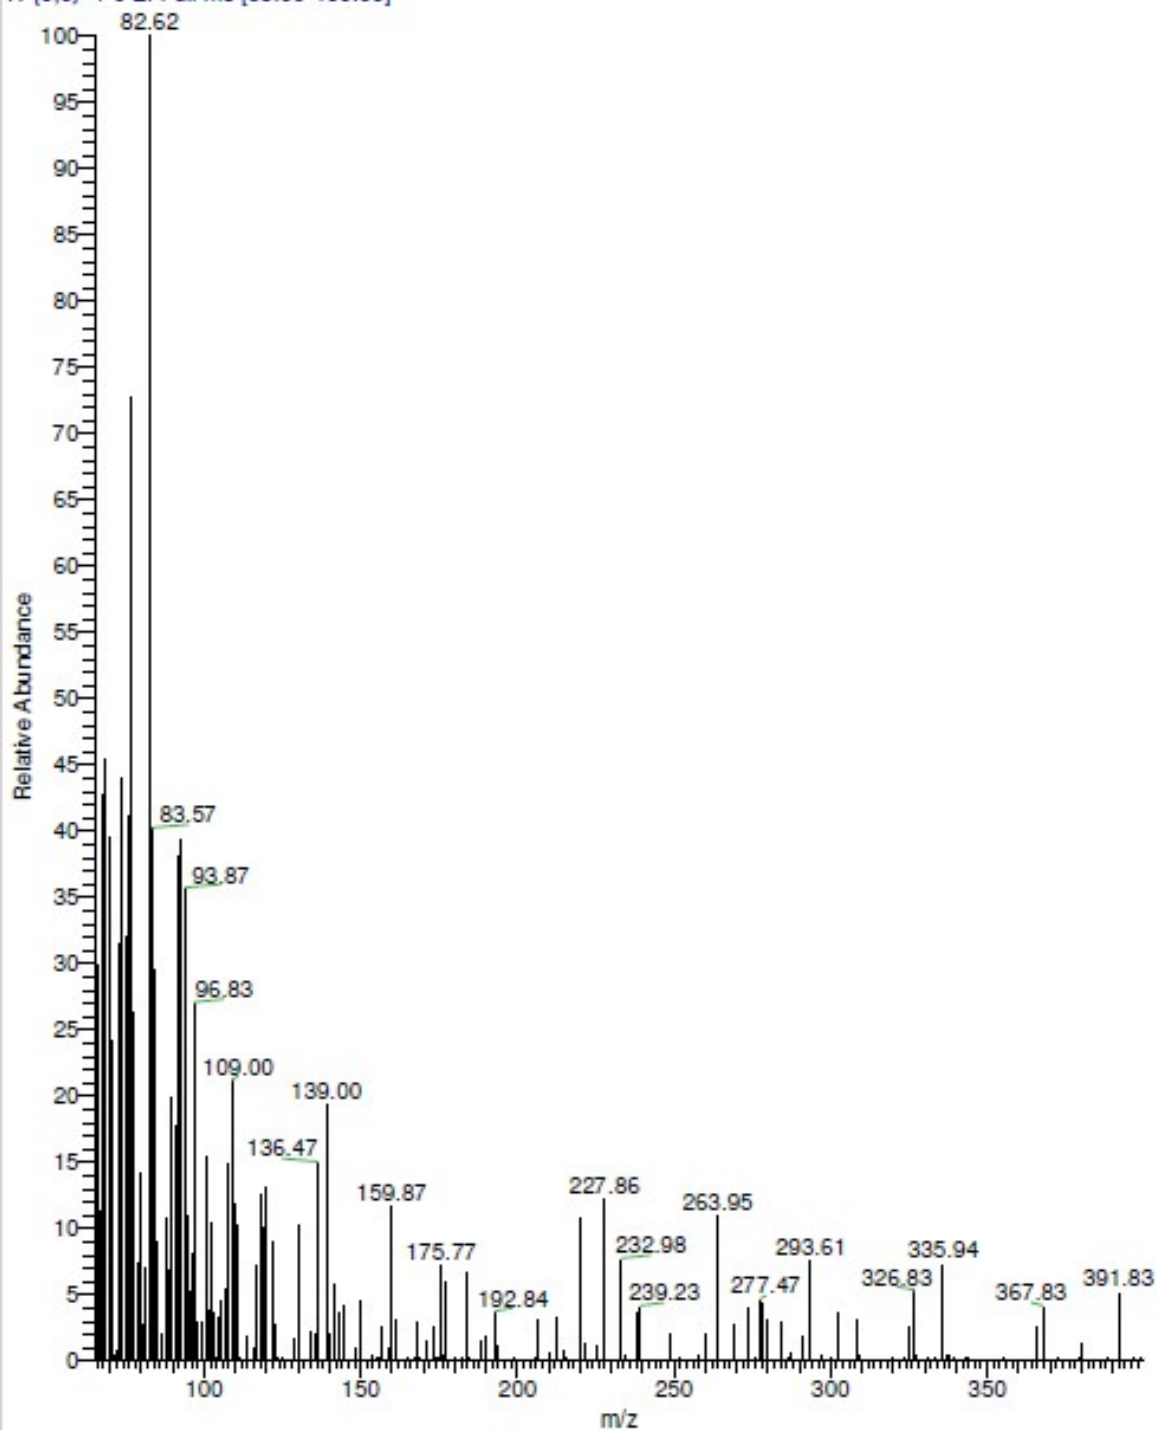

S28:  $^1\text{H}$  NMR spectrum of compound **8c** (400 MHz, DMSO- $d_6$ )

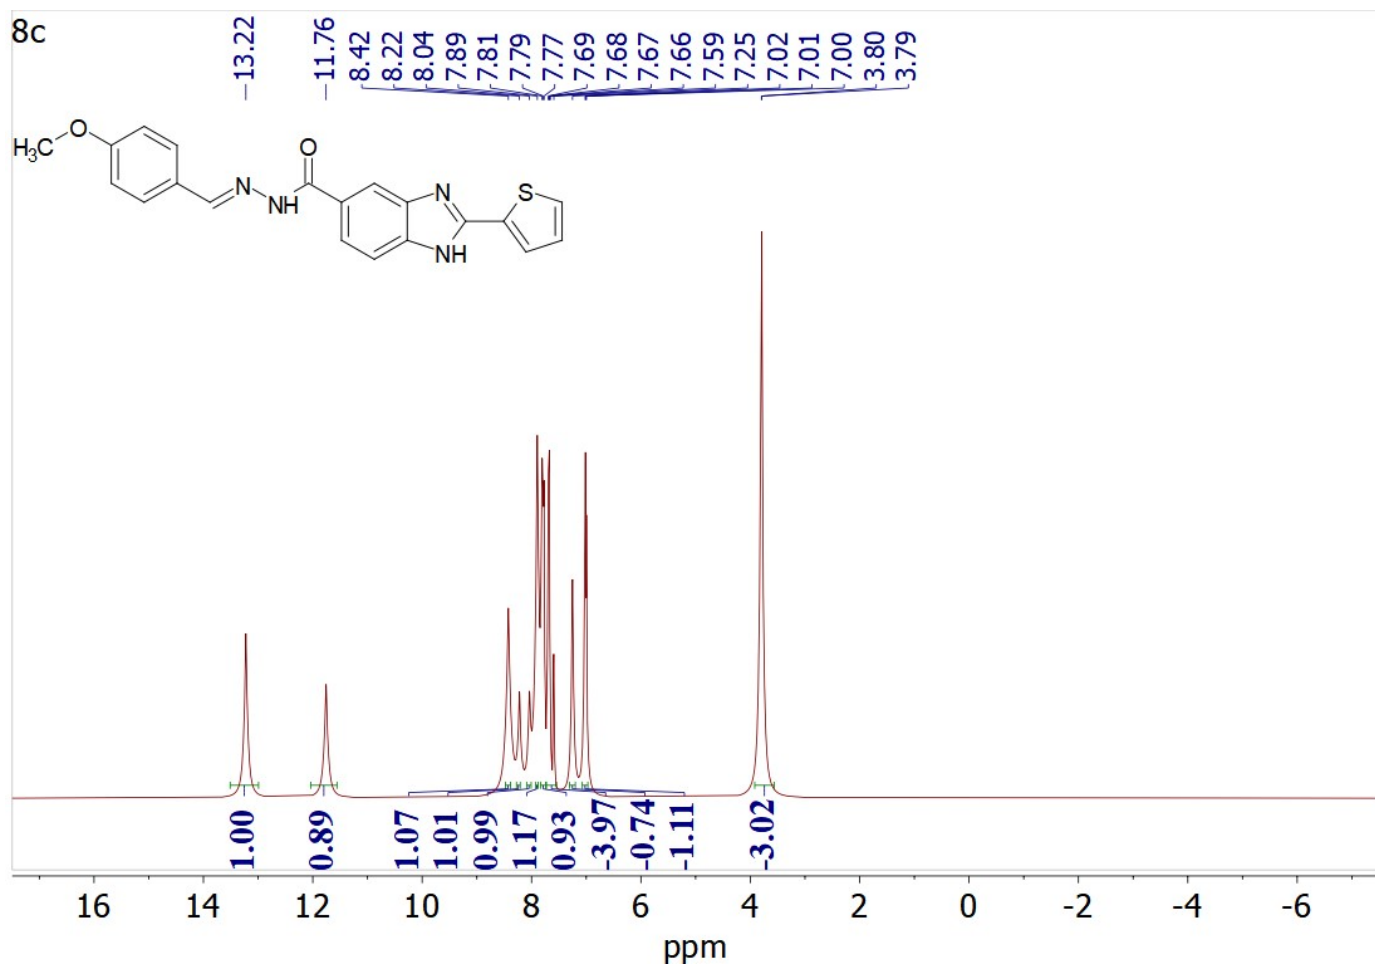

S29:  $^{13}\text{C}$  NMR spectrum of compound **8c** (100 MHz,  $\text{DMSO-}d_6$ )

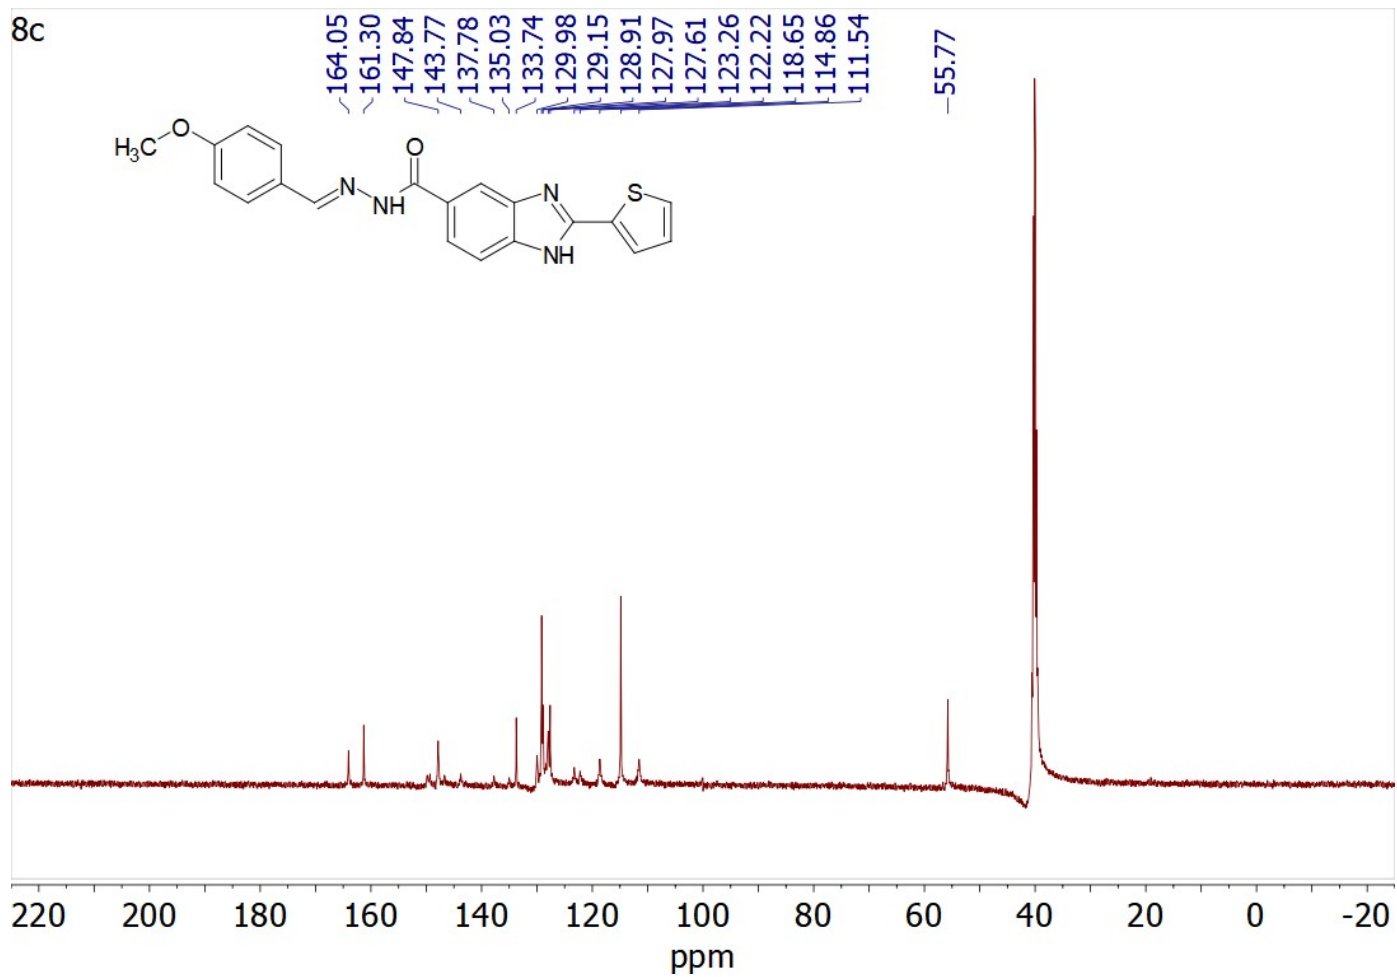

### S30: Mass spectrum of compound **8c**

Hayam-6c #1375 RT: 4.71 AV: 1 NL: 9.99E3  
T: (0,0) + c EI Full ms [65.00-400.00]

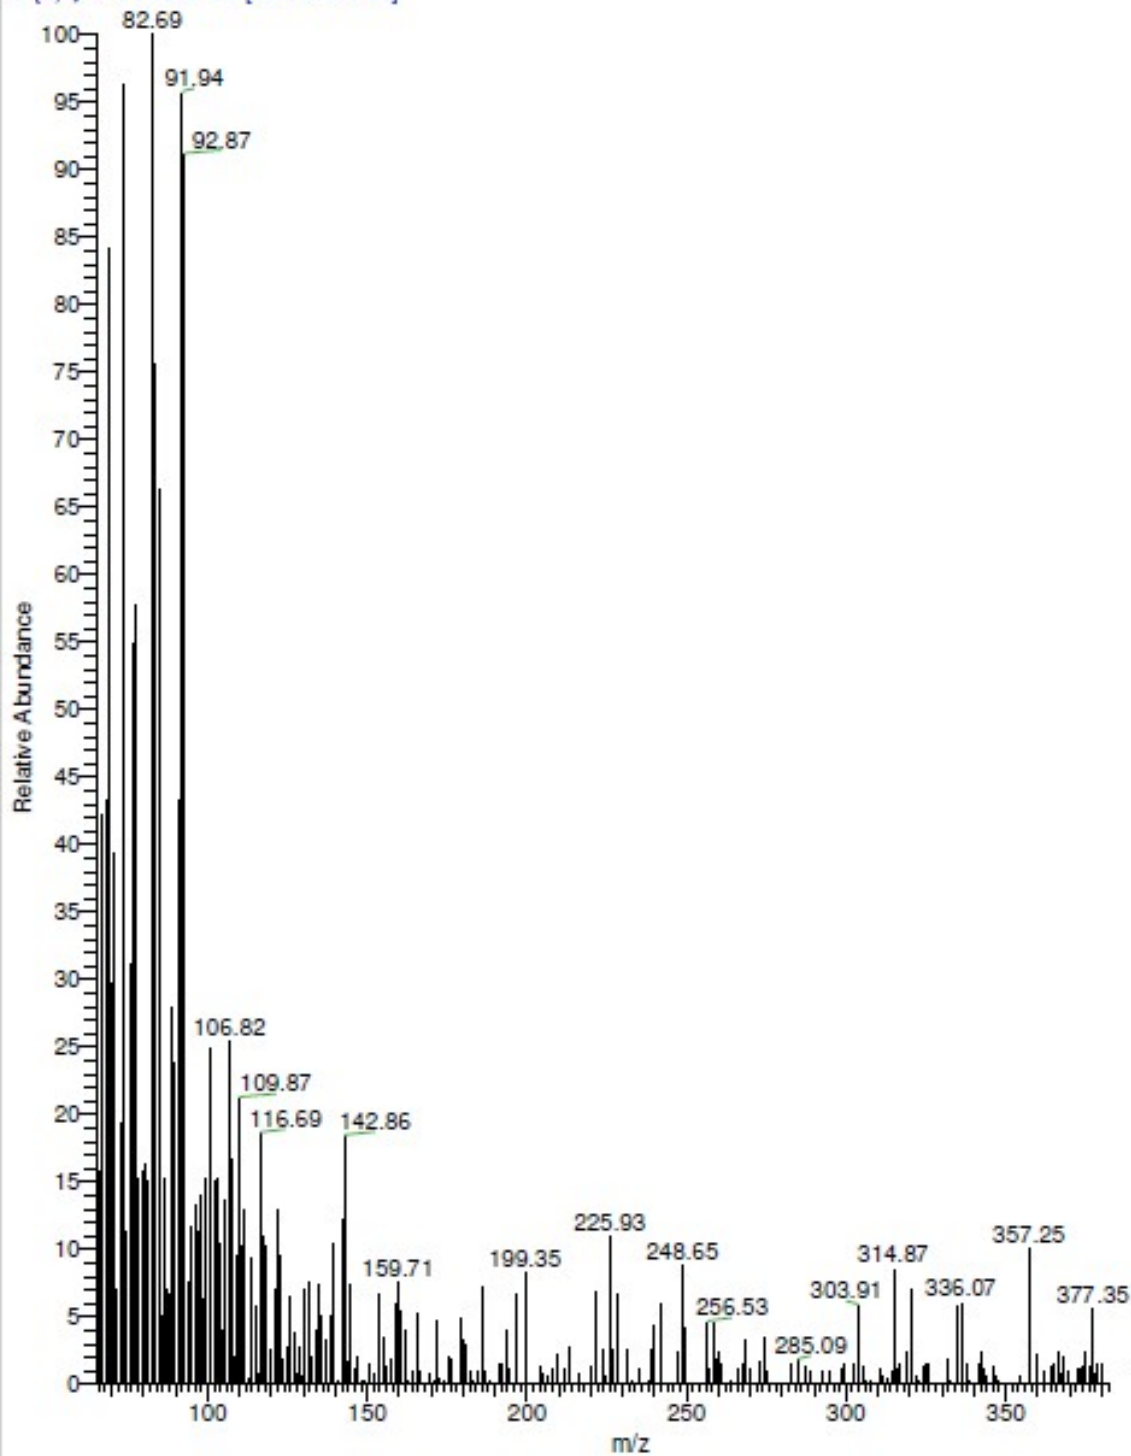

S31: <sup>1</sup>H NMR spectrum of compound 8d (400 MHz, DMSO-d<sub>6</sub>)

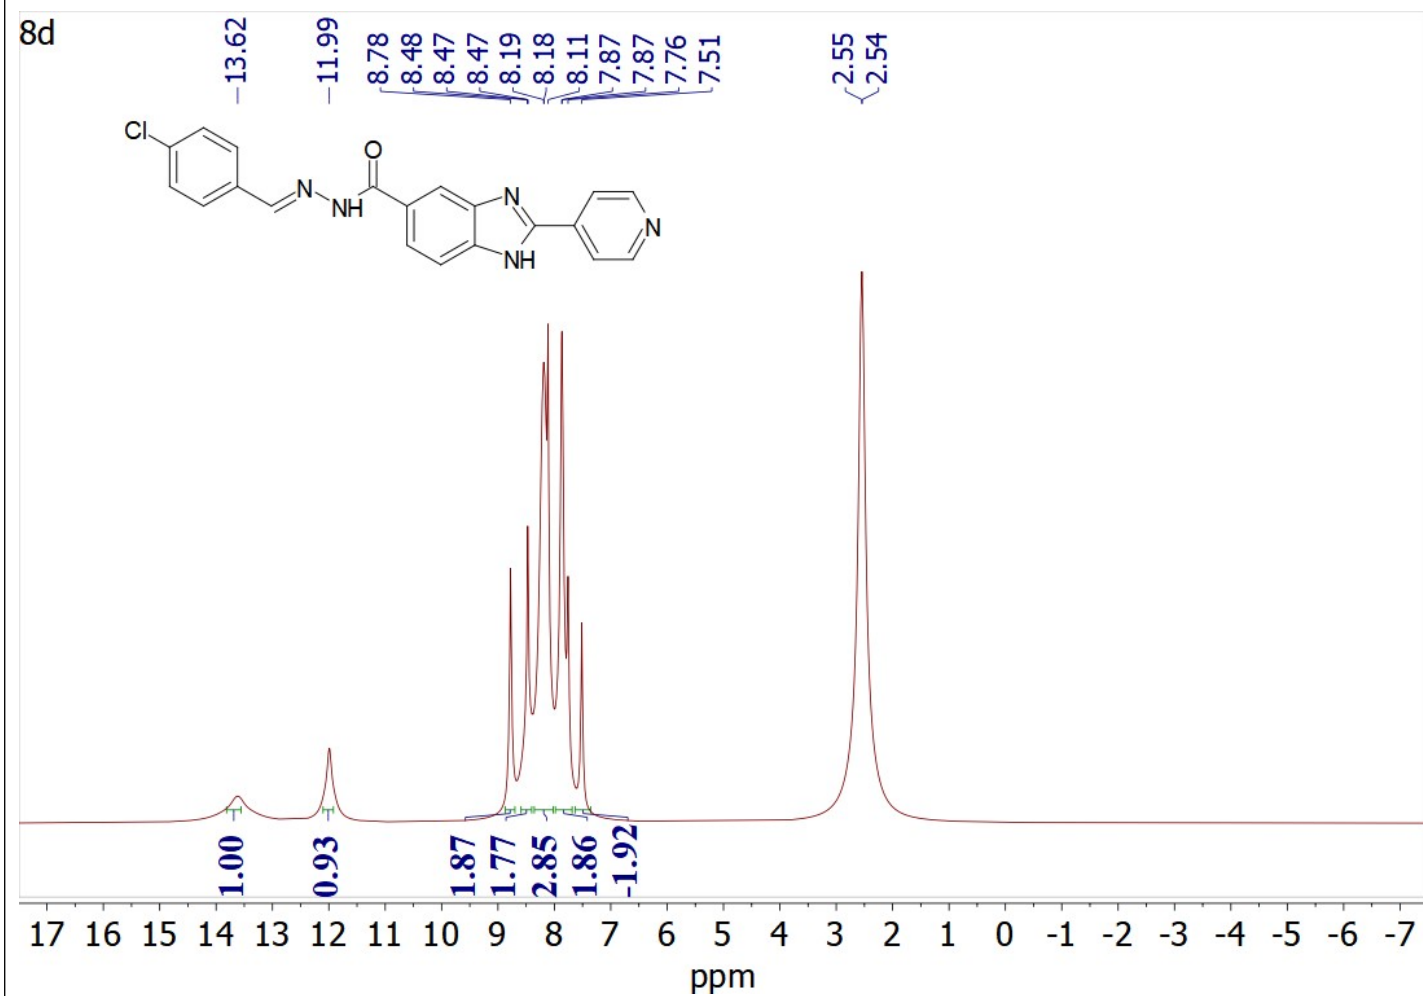

S32: <sup>1</sup>H NMR spectrum of compound 8d (400 MHz, DMSO-d<sub>6</sub>)

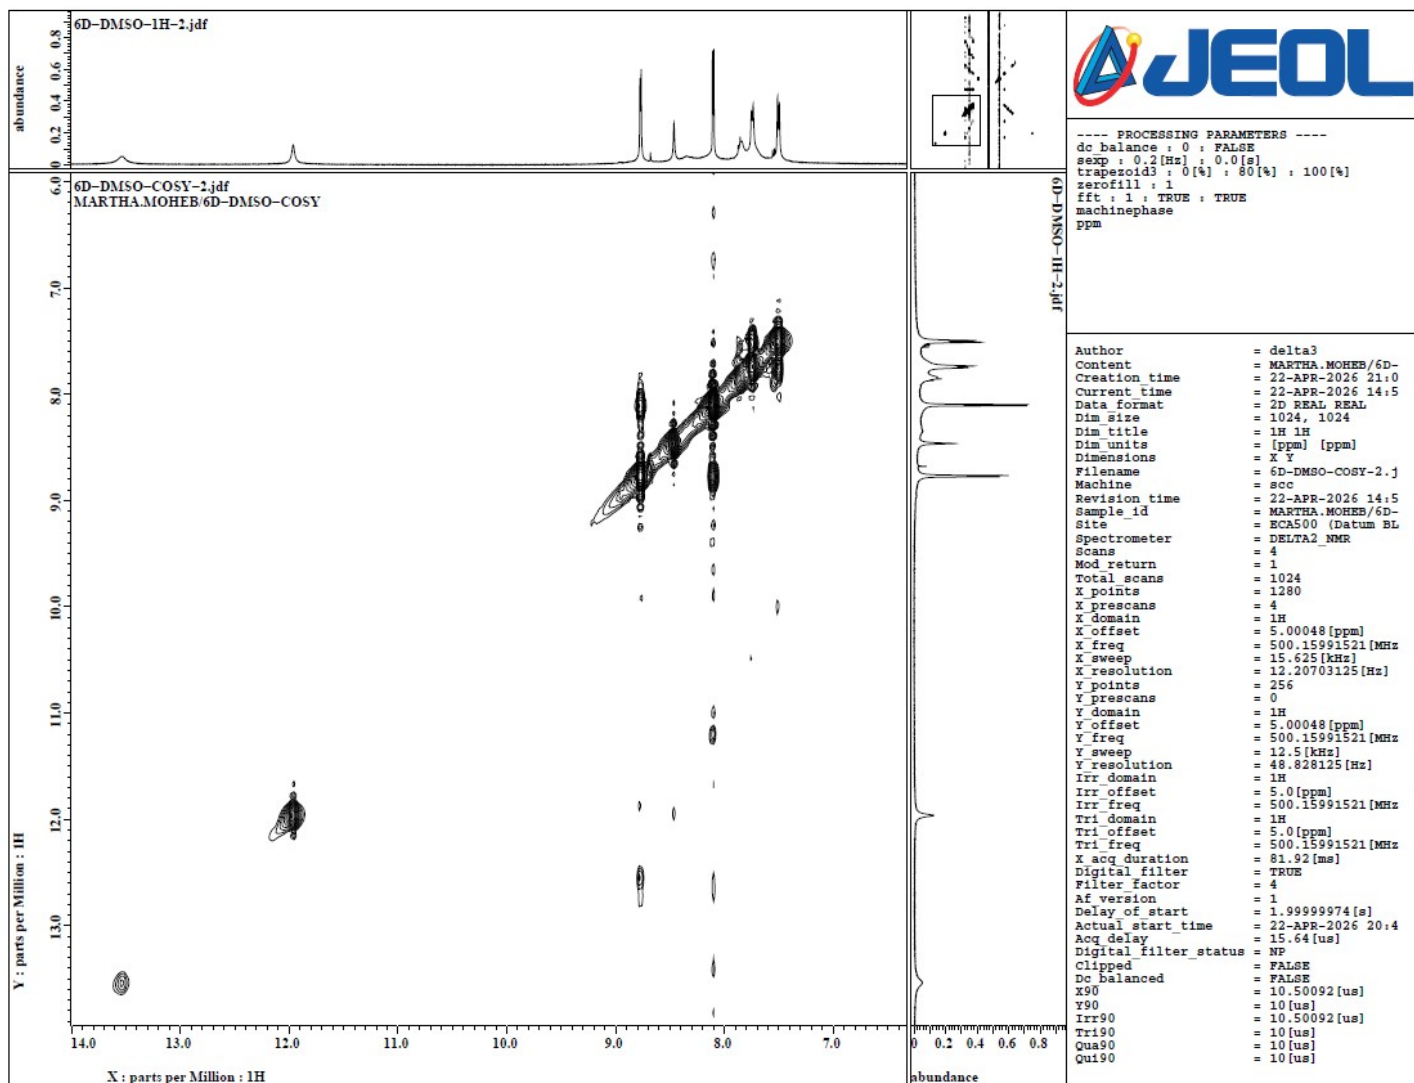

S33:  $^{13}\text{C}$  NMR spectrum of compound **8d** (100 MHz,  $\text{DMSO-}d_6$ )

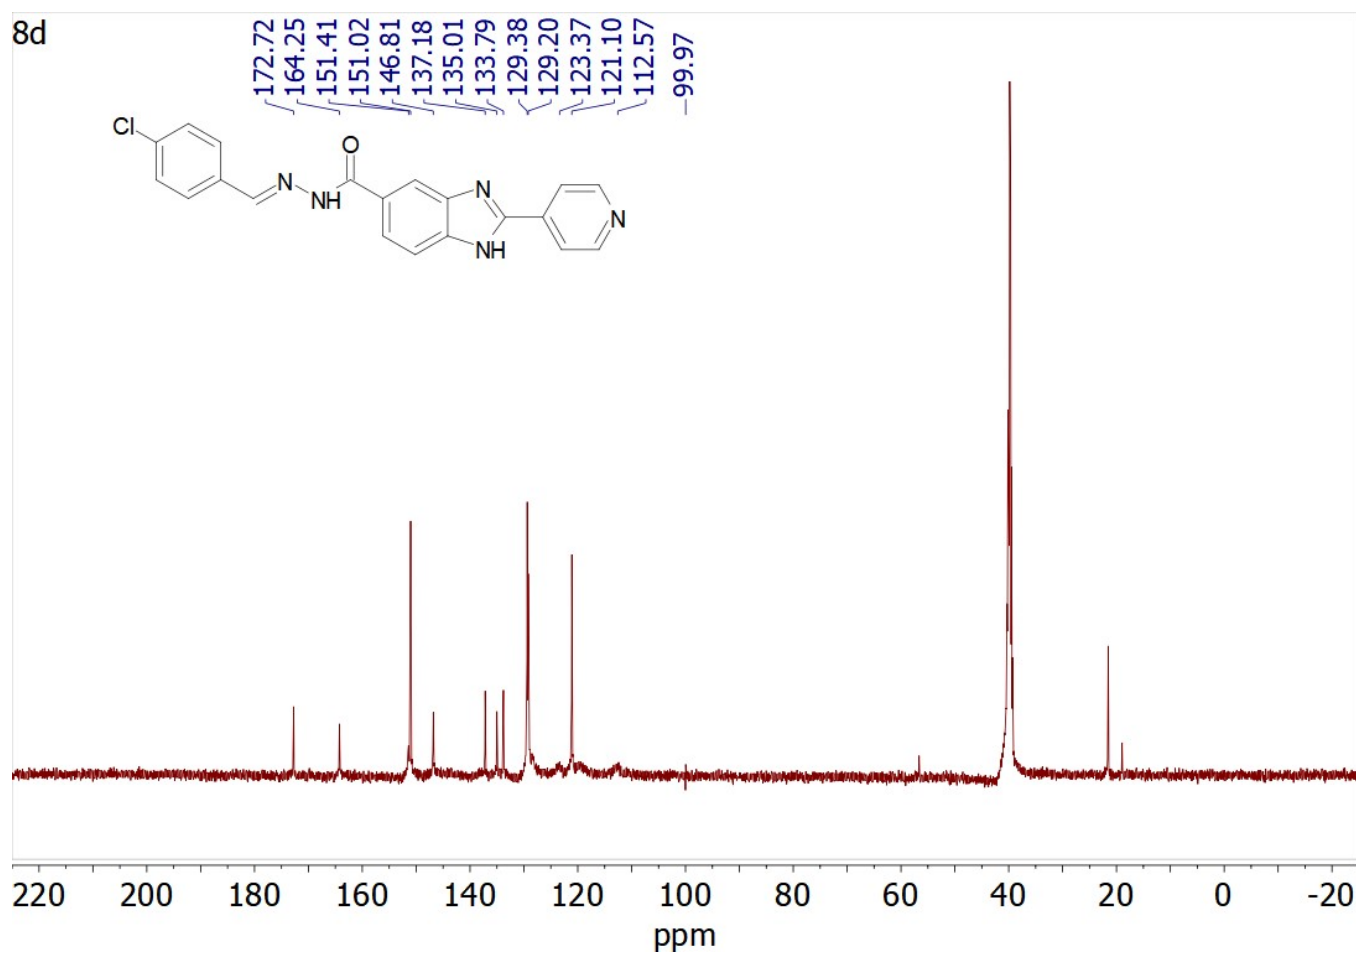

### S34: Mass spectrum of compound **8d**

C:\Xcalibur\...EI-MS\2026\2\Hayam-6d

03/02/2026 10:22:29 AM

Hayam-6d #871 RT: 2.99 AV: 1 NL: 6.37E4

T: {0,0} + c EI Full ms [65.00-400.00]

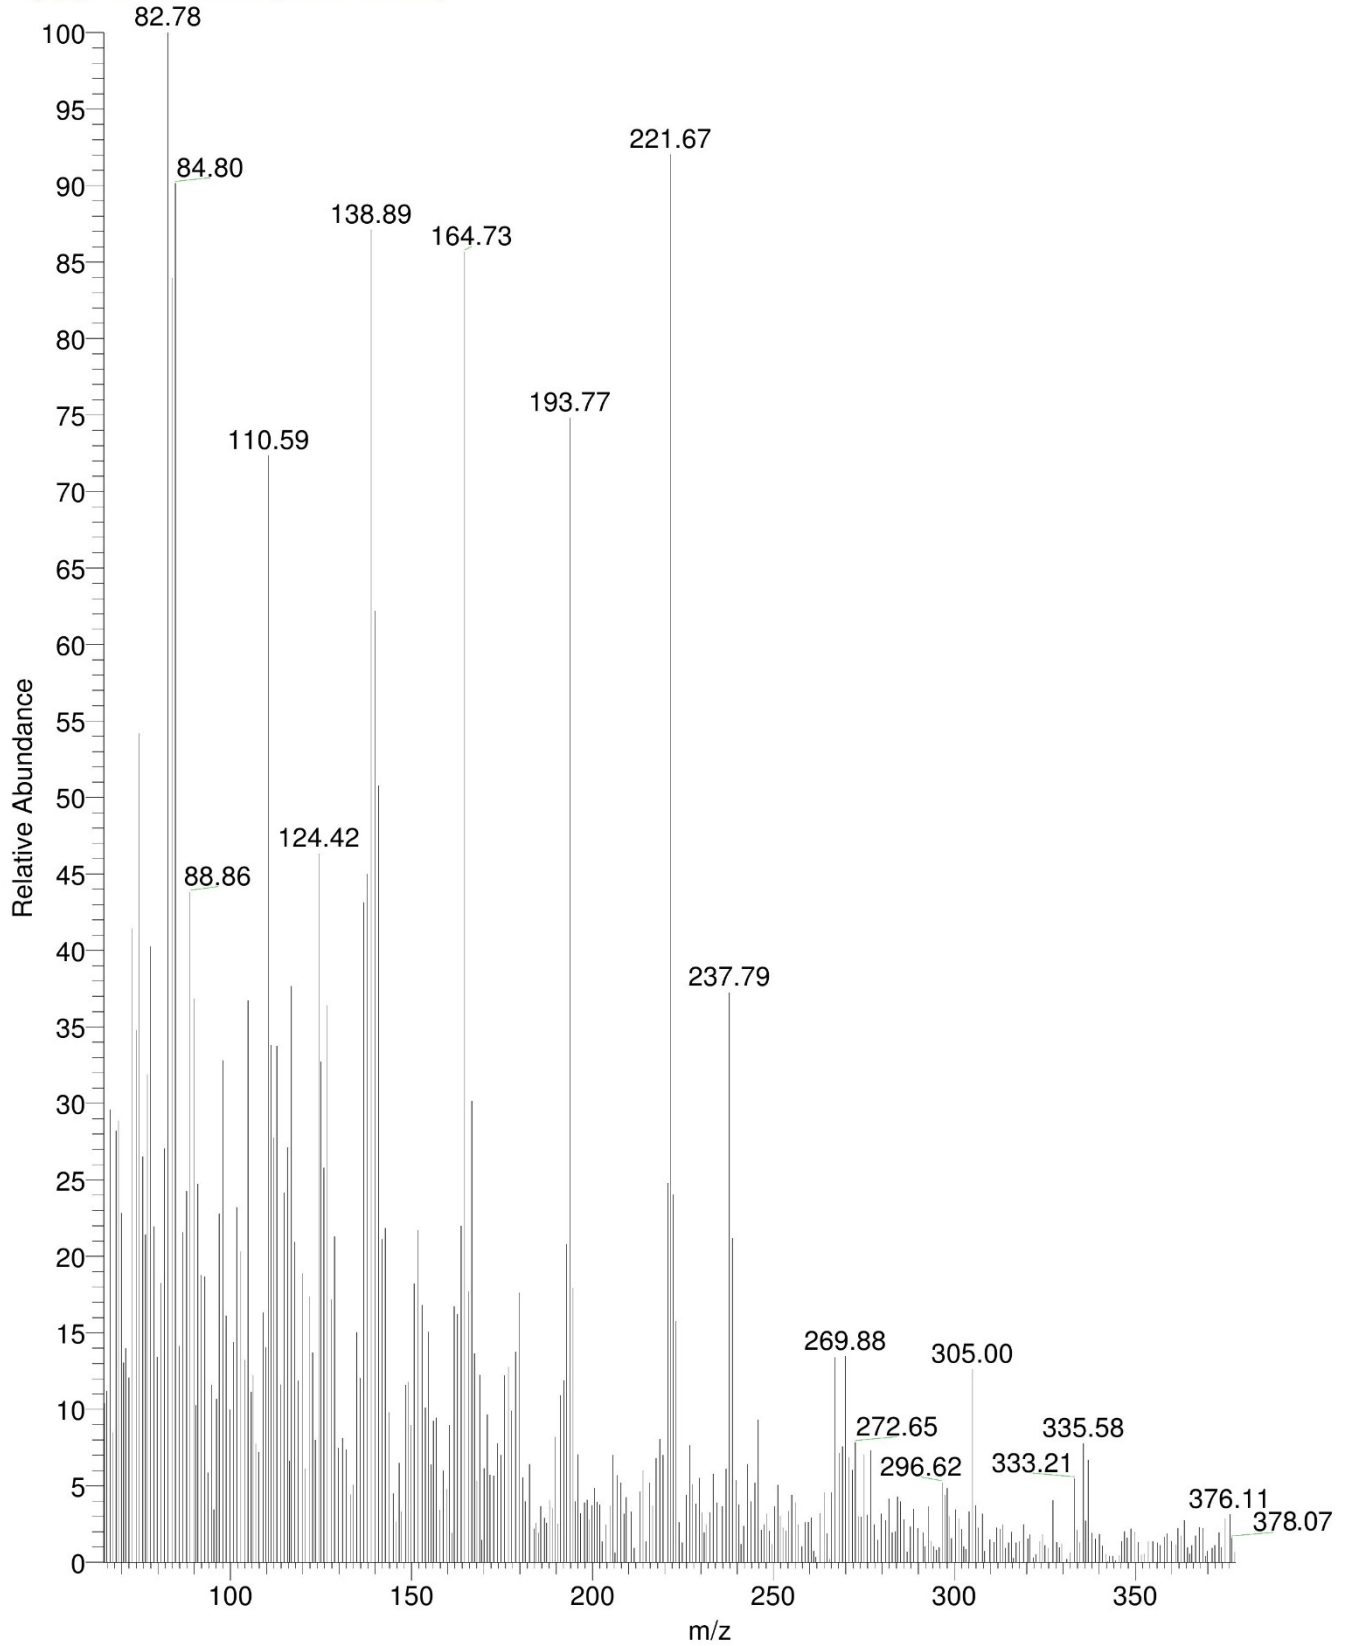

S35:  $^1\text{H}$  NMR spectrum of compound **8e** (400 MHz, DMSO- $d_6$ )

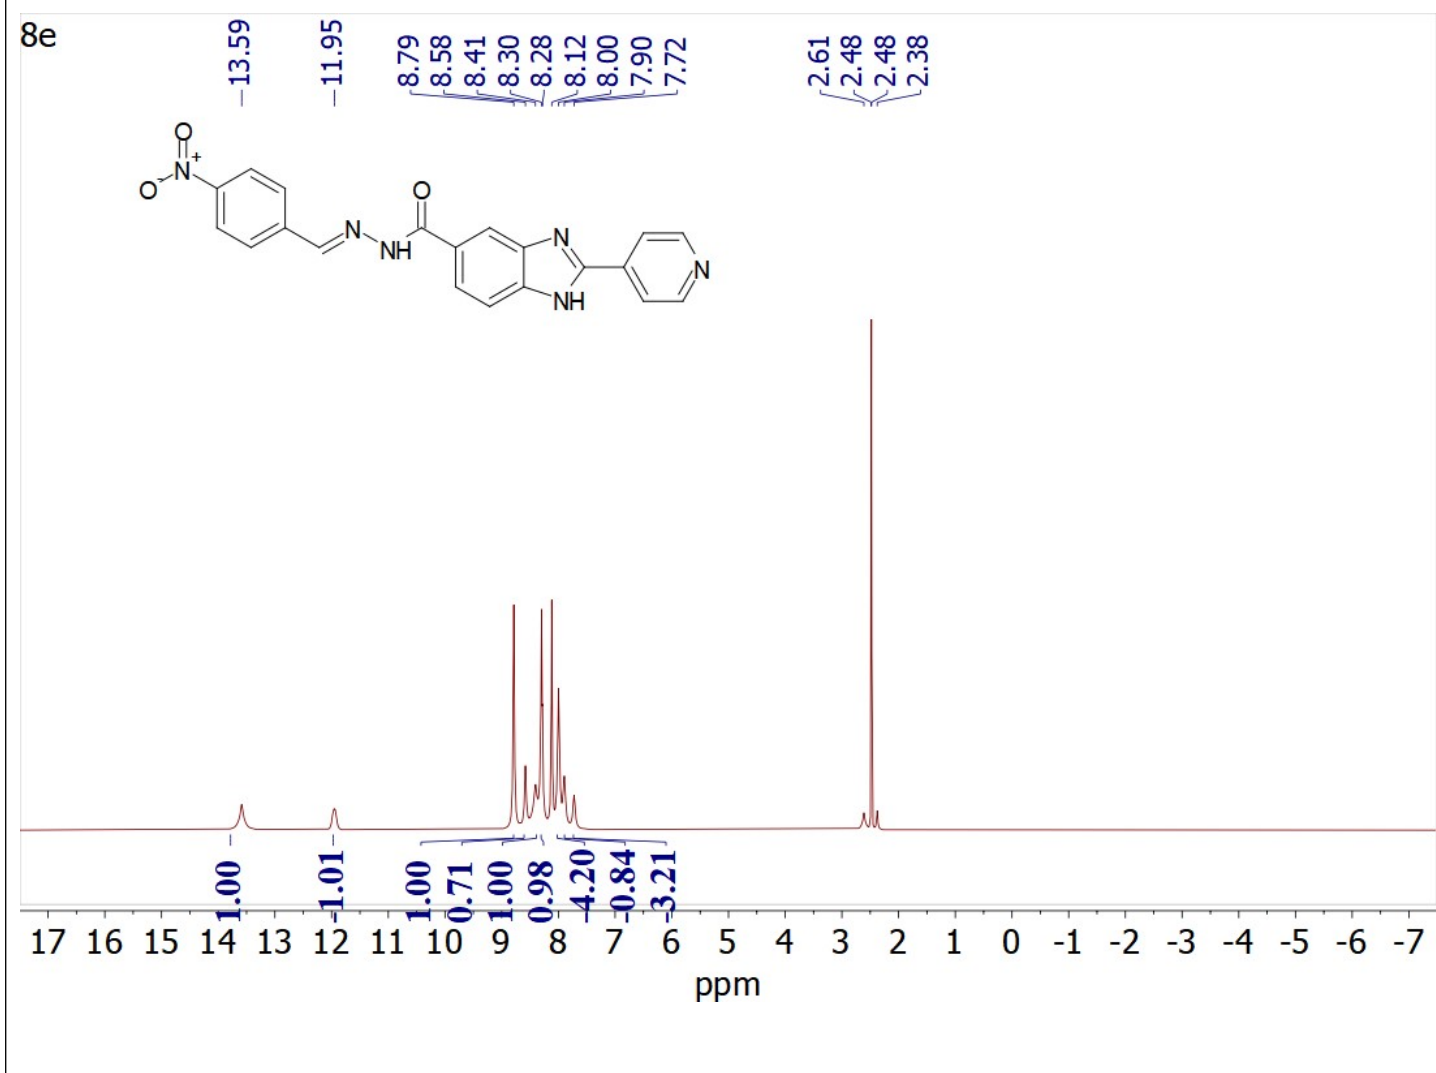

S36: <sup>13</sup>C NMR spectrum of compound 8e (100 MHz, DMSO-d<sub>6</sub>)

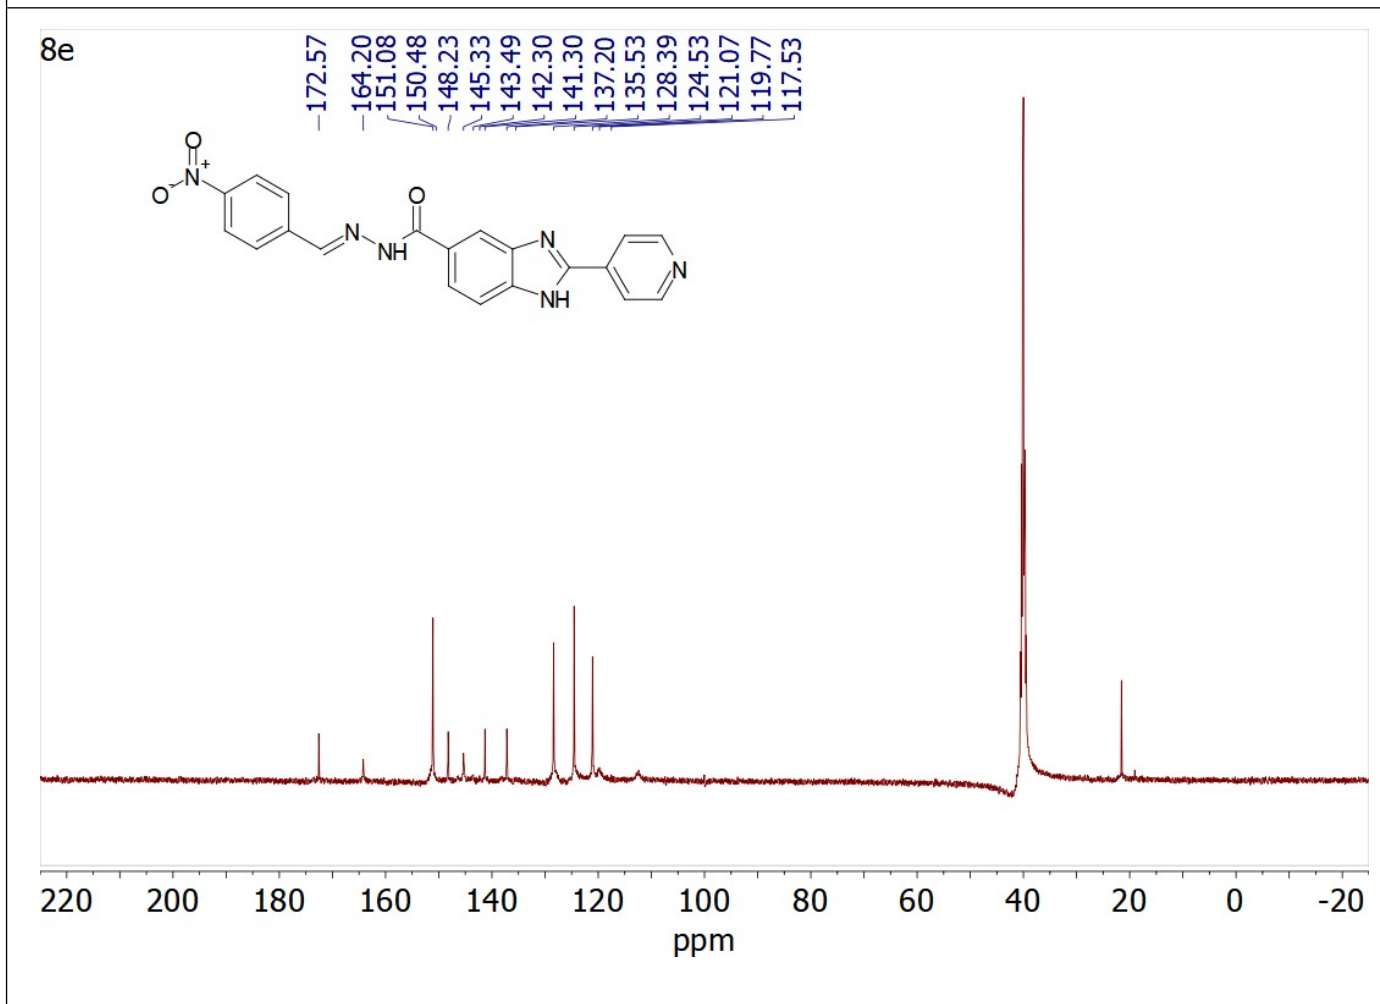

**S37: Mass spectrum of compound 8e**

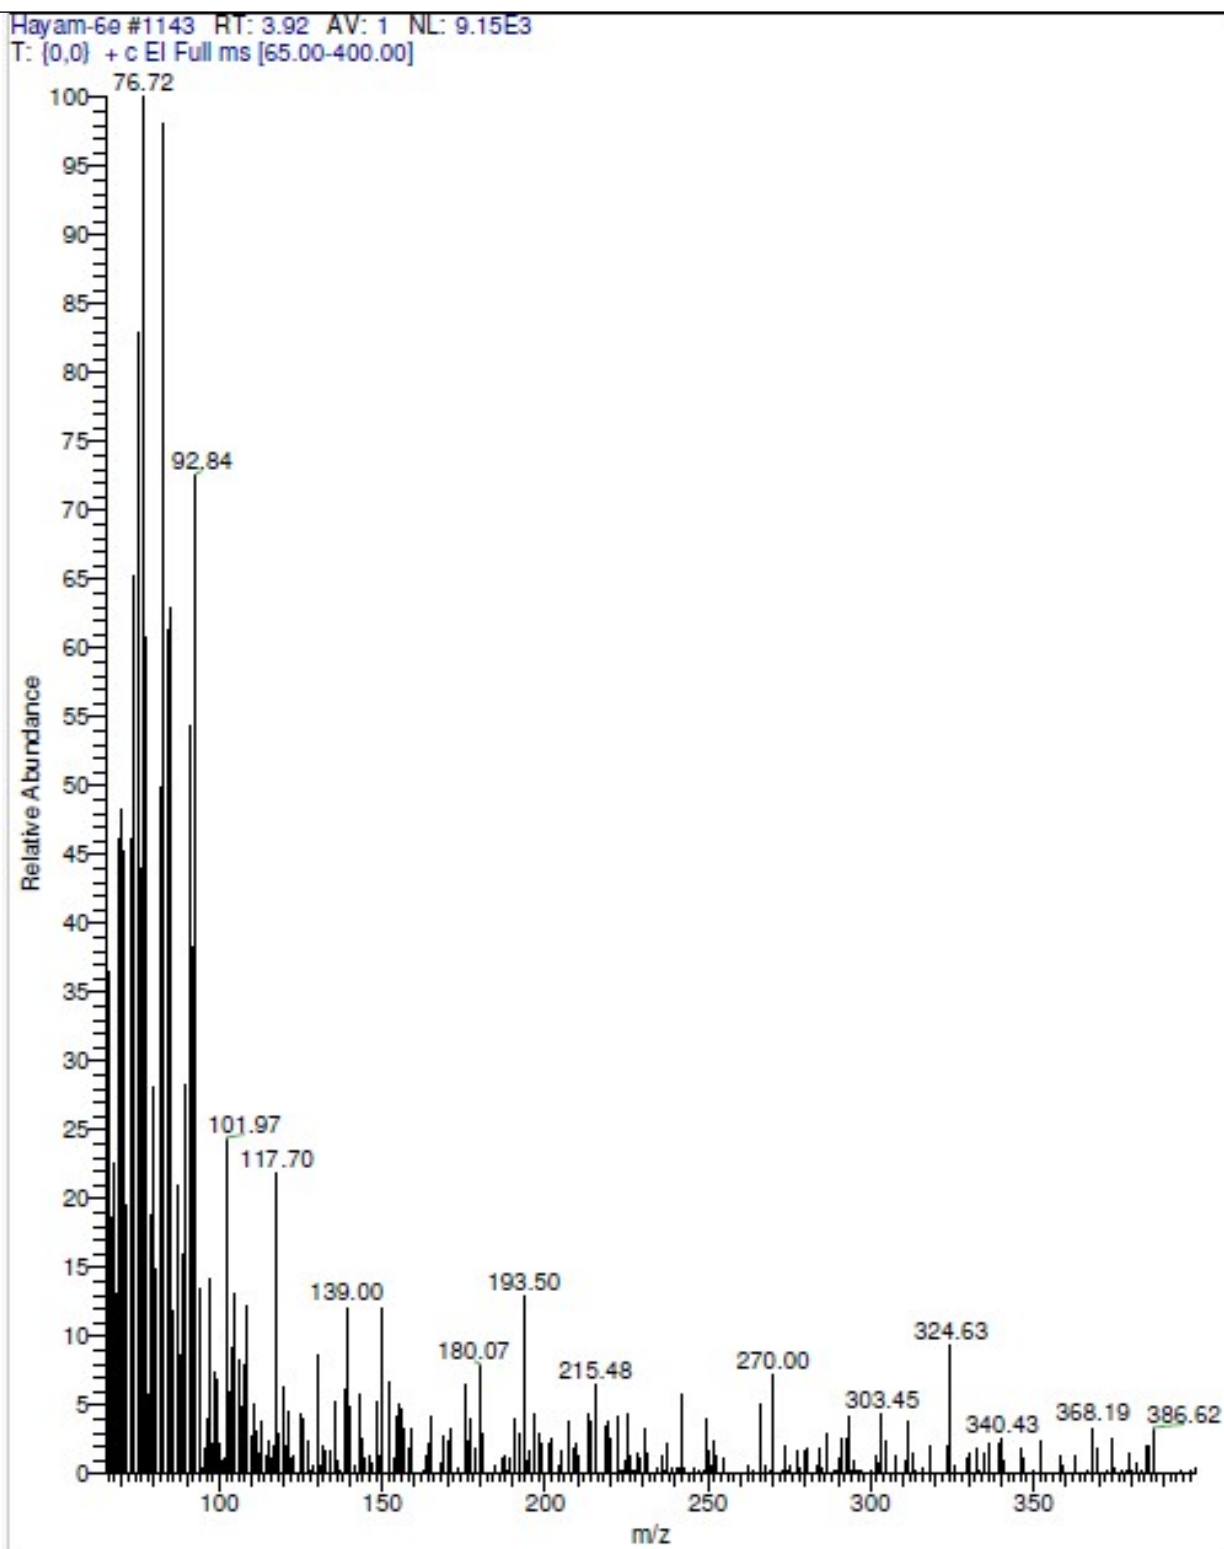

S39:  $^{13}\text{C}$  NMR spectrum of compound **8f** (100 MHz,  $\text{DMSO-}d_6$ )

S38:  $^1\text{H}$  NMR spectrum of compound **8f** (400 MHz,  $\text{DMSO-}d_6$ )

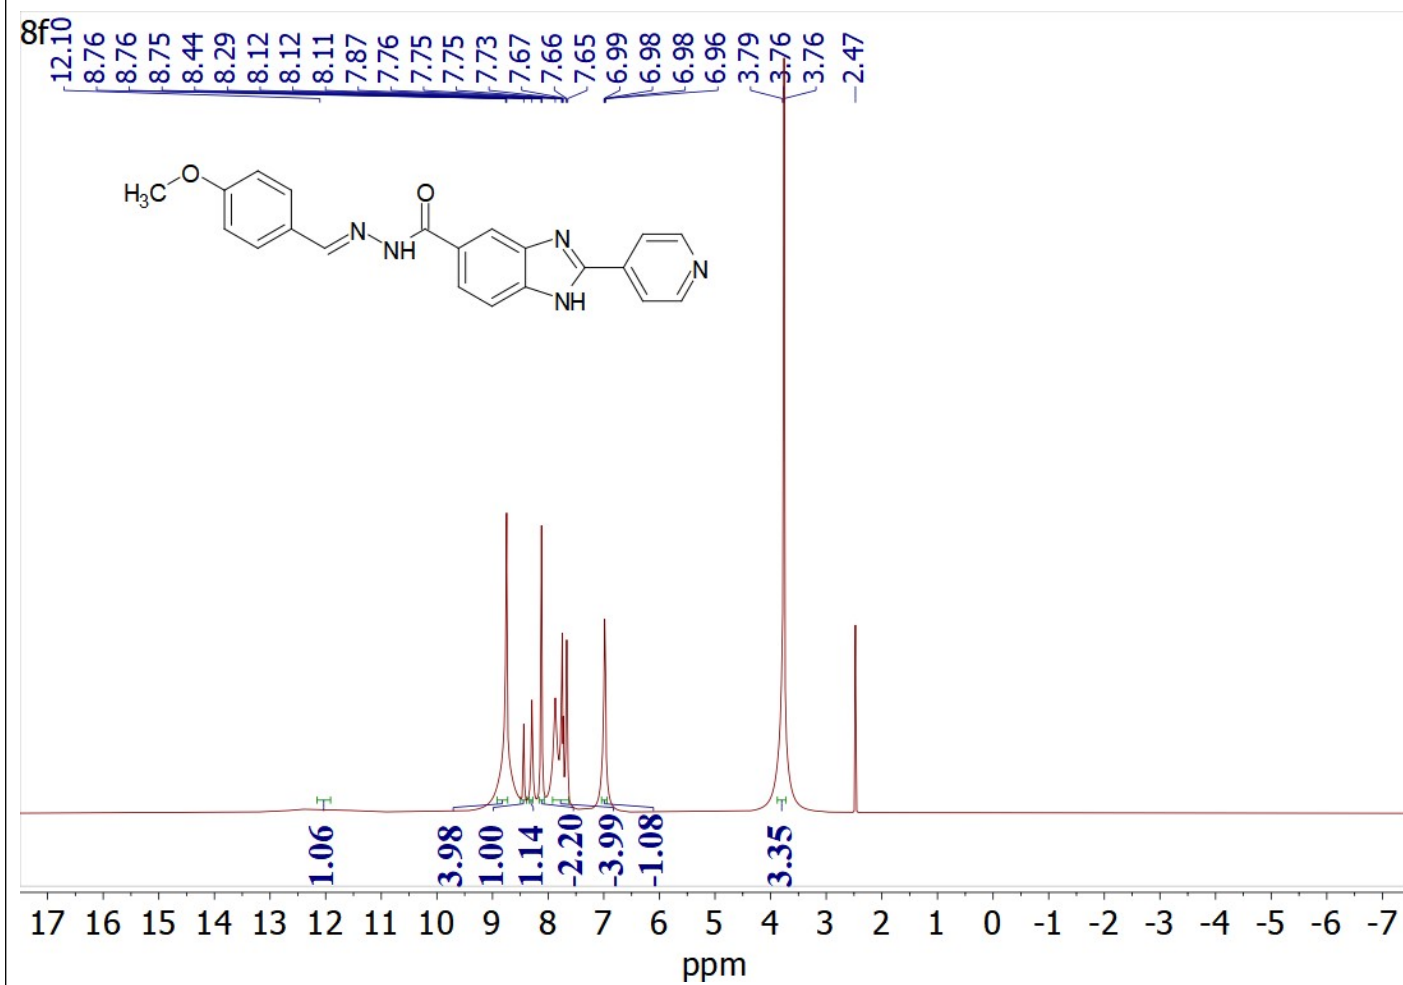

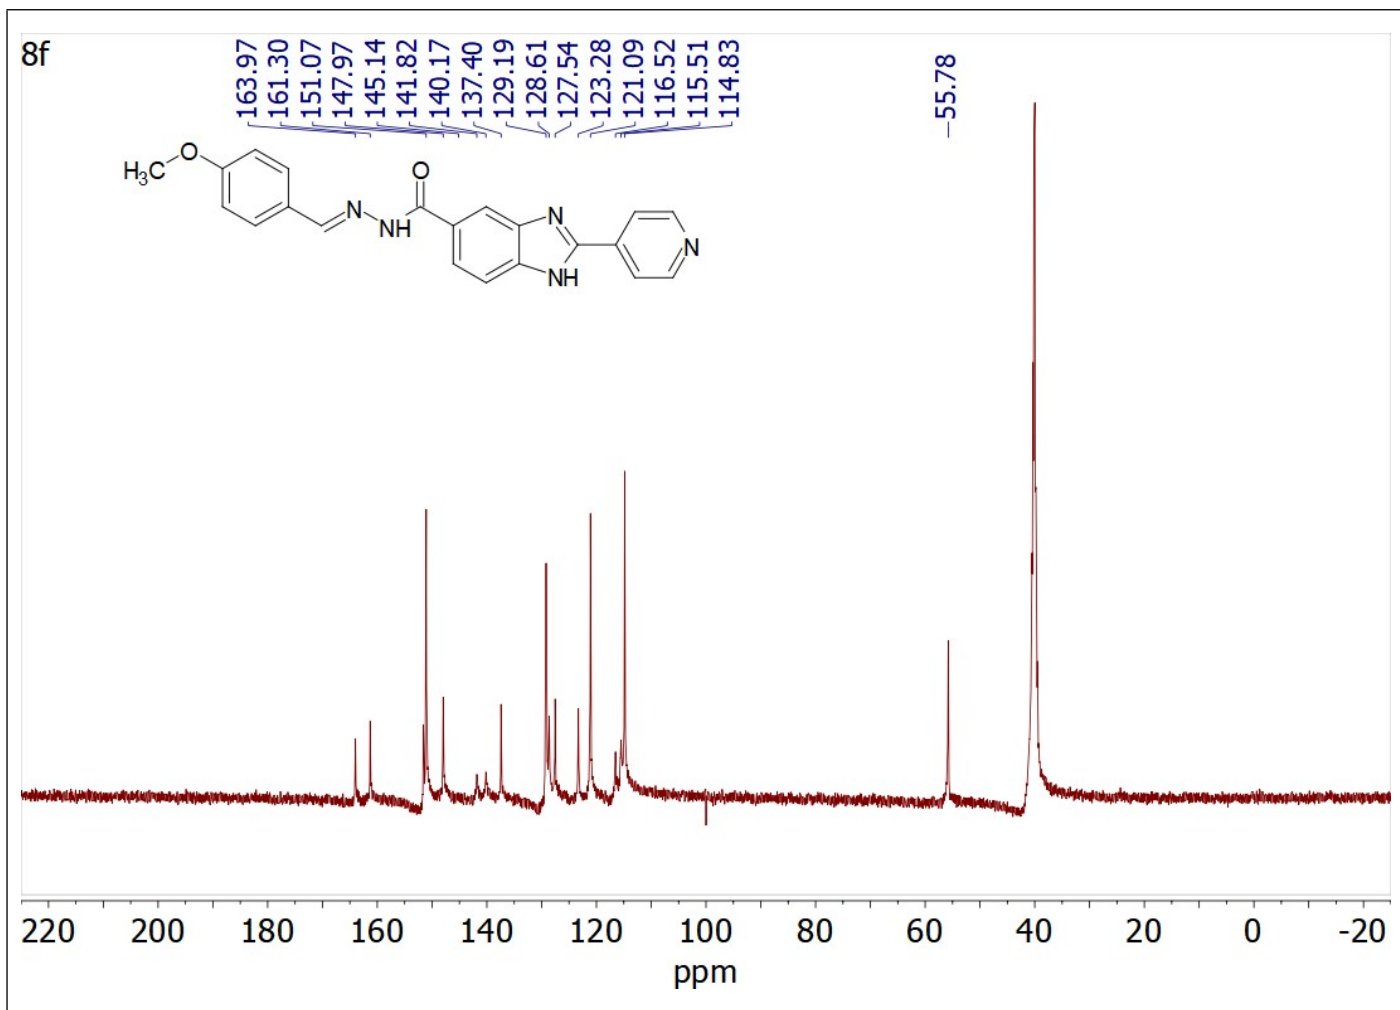

### S40: Mass spectrum chart of compound 8f

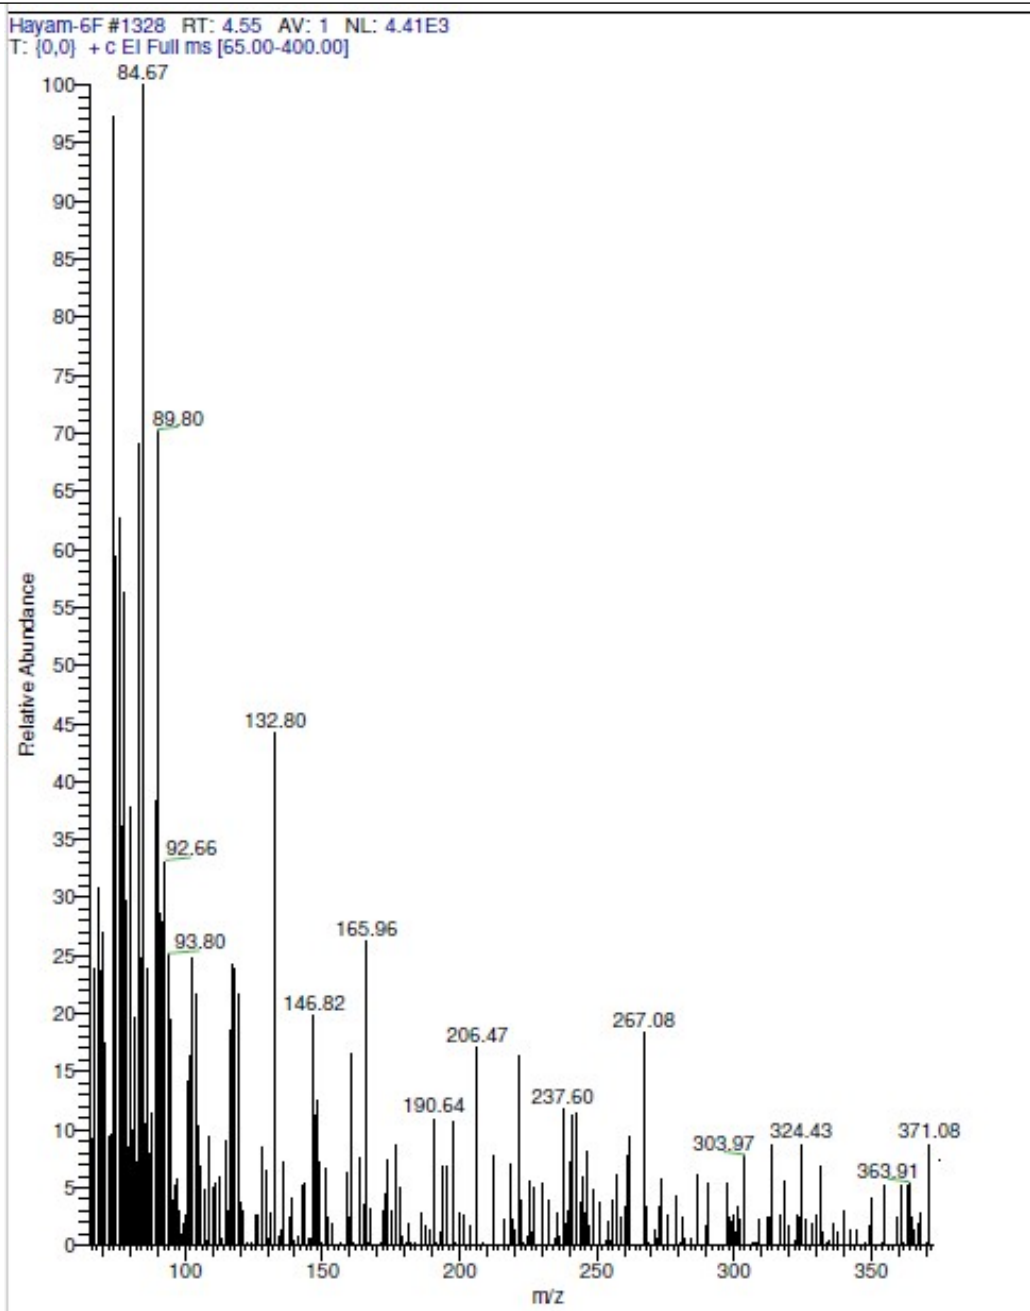

### General procedure for synthesis of compound 3a

A solution of o-diaminoaryl derivative (2 mmol), the appropriate substituted benzaldehyde (2 mmol), and sodium metabisulfite  $\text{Na}_2\text{S}_2\text{O}_5$  (2.40 mmol) in dimethylformamide was heated under reflux for 6–12 hours. Upon completion of the reaction (as monitored by TLC), the mixture was allowed to cool and subsequently poured into ice-water. The resulting precipitate was collected via filtration and purified by recrystallization from ethanol to afford the target compound 3a in good yields.

### 2-(thiophen-2-yl)-1H-benzimidazole-5-carboxylic acid (3a)

white powder, 88% yield, m.p. 125-127 °C,  $^1\text{H}$ NMR ( $\text{DMSO}-d_6$ , 400 MHz,  $\delta$  ppm): 7.23(s, 1H, OH carboxylic acid,  $\text{D}_2\text{O}$  exchangeable), 7.25 (d, 1H,  $J = 8.00$  Hz, Ar-H), 7.62 (d, 1H,  $J = 8.00$  Hz, Ar-H), 7.87 (d, 1H,  $J = 8.00$  Hz, Ar-H), 7.82 (d, 1H,  $J = 8.00$  Hz, Ar-H), 7.86 (d, 1H,  $J = 8.00$  Hz, Ar-H), 8.12 (s, 1H, Ar-H), 13.16 (s, 1H, NH benzimidazole,  $\text{D}_2\text{O}$  exchangeable).

### General procedure for synthesis of compound 4a

To a stirred solution of the appropriate carboxylic acid 3a (1.77 mmol) in absolute methanol (50 mL), a catalytic amount of concentrated sulfuric acid (a few drops) was added. The resulting mixture was heated under reflux for 17 hours. Upon completion, the reaction mixture was cooled to room temperature and poured into distilled water (50 mL). The solution was then neutralized by the addition of a 5% sodium carbonate ( $\text{Na}_2\text{CO}_3$ ) solution. The resulting precipitate was collected by filtration and purified via recrystallization from methanol to afford compounds 4a in good yields.

### methyl 2-(thiophen-2-yl)-1H-benzimidazole-5-carboxylate (4a)

Buff powder, 67% yield, m.p. 200-202 °C,  $^1\text{H}$ NMR ( $\text{DMSO}-d_6$ , 400 MHz,  $\delta$  ppm): 3.84 (s, 3H, CH<sub>3</sub>), 7.24 (m, 1H, Ar-H), 7.61 (d, 1H,  $J = 8.00$  Hz, Ar-H), 7.77 (d, 1H,  $J = 8.00$  Hz, Ar-H), 7.82 (d, 1H,  $J = 8.00$  Hz, Ar-H), 7.86 (d, 1H,  $J = 8.00$  Hz, Ar-H), 8.11(s, 1H, Ar-H), 13.32 (s, 1H, NH benzimidazole,  $\text{D}_2\text{O}$  exchangeable).

### General procedure for synthesis of compound 5a

A mixture of the appropriate ester 4a (1 mmol) and hydrazine monohydrate (95%, 2 mmol, 5 mL) in ethanol (15 mL) was heated under reflux for 7 hours. After cooling to room temperature, the reaction mixture was poured into ice-cold water. The resulting precipitate was collected by filtration, washed thoroughly with water, and dried under vacuum. Purification by recrystallization from absolute ethanol afforded the target compound **5a** in good yields.

### 2-(thiophen-2-yl)-1*H*-benzimidazole-5-carbohydrazide (**5a**)

Gray powder, 60% yield, m.p. 216-218 °C, <sup>1</sup>HNMR (DMSO-*d*<sub>6</sub>, 400 MHz,  $\delta$  ppm): 4.57 (s, 2H, NH<sub>2</sub>, D<sub>2</sub>O exchangeable), 6.23(m, 1H, Ar-H), 7.53-7.62 (m, 2H, Ar-H), 7.74 (d, 1H, *J* = 8.00 Hz, Ar-H), 7.87 (d, 1H, *J* = 8.00 Hz, Ar-H), 8.09 (s, 1H, Ar-H), 9.78 (s, 1H, NH amide, D<sub>2</sub>O exchangeable), 13.17 (brs, 1H, NH benzimidazole, D<sub>2</sub>O exchangeable).

## Average of Relative viability of cells (%)

| Conc.( $\mu$ M) | HePG2       | HCT116      | MCF7        |
|-----------------|-------------|-------------|-------------|
| <b>DOX</b>      |             |             |             |
| <b>100</b>      | <b>6.3</b>  | <b>7.1</b>  | <b>6.2</b>  |
| <b>50</b>       | <b>11.2</b> | <b>13.9</b> | <b>10.9</b> |
| <b>25</b>       | <b>14.1</b> | <b>18.7</b> | <b>14.3</b> |
| <b>12.5</b>     | <b>28.3</b> | <b>31.4</b> | <b>26.9</b> |
| <b>6.25</b>     | <b>45.8</b> | <b>47.9</b> | <b>41.5</b> |
| <b>3.125</b>    | <b>57.6</b> | <b>60.5</b> | <b>58.4</b> |
| <b>1.56</b>     | <b>71.2</b> | <b>73.8</b> | <b>69.1</b> |
| <b>7d</b>       |             |             |             |
| <b>100</b>      | <b>35.4</b> | <b>36.1</b> | <b>24.7</b> |
| <b>50</b>       | <b>49.1</b> | <b>48.3</b> | <b>39.2</b> |
| <b>25</b>       | <b>56.2</b> | <b>63.4</b> | <b>51.4</b> |
| <b>12.5</b>     | <b>69.9</b> | <b>75.2</b> | <b>68.3</b> |
| <b>6.25</b>     | <b>83.7</b> | <b>96.0</b> | <b>79.1</b> |
| <b>3.125</b>    | <b>98.3</b> | <b>100</b>  | <b>97.4</b> |
| <b>1.56</b>     | <b>100</b>  | <b>100</b>  | <b>100</b>  |
| <b>7a</b>       |             |             |             |
| <b>100</b>      | <b>28.5</b> | <b>25.3</b> | <b>20.5</b> |
| <b>50</b>       | <b>41.7</b> | <b>31.9</b> | <b>29.3</b> |
| <b>25</b>       | <b>53.3</b> | <b>45.6</b> | <b>37.1</b> |
| <b>12.5</b>     | <b>69.6</b> | <b>57.2</b> | <b>47.8</b> |
| <b>6.25</b>     | <b>81.8</b> | <b>70.4</b> | <b>68.7</b> |
| <b>3.125</b>    | <b>100</b>  | <b>91.7</b> | <b>87.2</b> |
| <b>1.56</b>     | <b>100</b>  | <b>100</b>  | <b>100</b>  |
| <b>7e</b>       |             |             |             |
| <b>100</b>      | <b>31.6</b> | <b>31.4</b> | <b>25.6</b> |
| <b>50</b>       | <b>40.9</b> | <b>41.7</b> | <b>36.4</b> |
| <b>25</b>       | <b>61.1</b> | <b>52.8</b> | <b>50.1</b> |
| <b>12.5</b>     | <b>70.3</b> | <b>73.5</b> | <b>64.7</b> |
| <b>6.25</b>     | <b>86.5</b> | <b>88.2</b> | <b>80.5</b> |
| <b>3.125</b>    | <b>99.7</b> | <b>99.3</b> | <b>96.1</b> |
| <b>1.56</b>     | <b>100</b>  | <b>100</b>  | <b>100</b>  |
| <b>8f</b>       |             |             |             |
| <b>100</b>      | <b>8.6</b>  | <b>7.9</b>  | <b>8.5</b>  |
| <b>50</b>       | <b>16.9</b> | <b>19.3</b> | <b>16.8</b> |
| <b>25</b>       | <b>24.2</b> | <b>22.6</b> | <b>25.7</b> |
| <b>12.5</b>     | <b>32.7</b> | <b>39.2</b> | <b>31.9</b> |
| <b>6.25</b>     | <b>55.8</b> | <b>58.4</b> | <b>60.3</b> |
| <b>3.125</b>    | <b>70.3</b> | <b>85.7</b> | <b>69.6</b> |
| <b>1.56</b>     | <b>88.4</b> | <b>98.1</b> | <b>89.4</b> |

| <b>7b</b>    |             |             |             |
|--------------|-------------|-------------|-------------|
| <b>100</b>   | <b>23.9</b> | <b>29.1</b> | <b>20.3</b> |
| <b>50</b>    | <b>37.8</b> | <b>38.4</b> | <b>31.1</b> |
| <b>25</b>    | <b>49.3</b> | <b>52.6</b> | <b>42.4</b> |
| <b>12.5</b>  | <b>53.7</b> | <b>63.9</b> | <b>54.2</b> |
| <b>6.25</b>  | <b>70.2</b> | <b>80.3</b> | <b>71.5</b> |
| <b>3.125</b> | <b>92.5</b> | <b>96.2</b> | <b>92.3</b> |
| <b>1.56</b>  | <b>100</b>  | <b>100</b>  | <b>100</b>  |
| <b>7f</b>    |             |             |             |
| <b>100</b>   | <b>43.6</b> | <b>47.7</b> | <b>35.6</b> |
| <b>50</b>    | <b>52.3</b> | <b>58.5</b> | <b>48.2</b> |
| <b>25</b>    | <b>62.1</b> | <b>72.4</b> | <b>60.5</b> |
| <b>12.5</b>  | <b>78.5</b> | <b>84.6</b> | <b>72.3</b> |
| <b>6.25</b>  | <b>99.2</b> | <b>98.1</b> | <b>89.4</b> |
| <b>3.125</b> | <b>100</b>  | <b>100</b>  | <b>100</b>  |
| <b>1.56</b>  | <b>100</b>  | <b>100</b>  | <b>100</b>  |
| <b>8e</b>    |             |             |             |
| <b>100</b>   | <b>36.4</b> | <b>41.9</b> | <b>30.4</b> |
| <b>50</b>    | <b>49.3</b> | <b>49.1</b> | <b>41.6</b> |
| <b>25</b>    | <b>60.2</b> | <b>65.4</b> | <b>53.1</b> |
| <b>12.5</b>  | <b>74.5</b> | <b>78.3</b> | <b>65.4</b> |
| <b>6.25</b>  | <b>87.1</b> | <b>92.5</b> | <b>79.2</b> |
| <b>3.125</b> | <b>100</b>  | <b>100</b>  | <b>98.7</b> |
| <b>1.56</b>  | <b>100</b>  | <b>100</b>  | <b>100</b>  |
| <b>7c</b>    |             |             |             |
| <b>100</b>   | <b>48.3</b> | <b>55.2</b> | <b>46.5</b> |
| <b>50</b>    | <b>60.5</b> | <b>68.5</b> | <b>57.3</b> |
| <b>25</b>    | <b>76.1</b> | <b>81.6</b> | <b>70.2</b> |
| <b>12.5</b>  | <b>88.2</b> | <b>95.1</b> | <b>83.4</b> |
| <b>6.25</b>  | <b>98.9</b> | <b>100</b>  | <b>96.5</b> |
| <b>3.125</b> | <b>100</b>  | <b>100</b>  | <b>100</b>  |
| <b>1.56</b>  | <b>100</b>  | <b>100</b>  | <b>100</b>  |
| <b>8b</b>    |             |             |             |
| <b>100</b>   | <b>38.4</b> | <b>49.7</b> | <b>33.6</b> |
| <b>50</b>    | <b>50.9</b> | <b>61.3</b> | <b>45.2</b> |
| <b>25</b>    | <b>62.5</b> | <b>72.9</b> | <b>56.0</b> |
| <b>12.5</b>  | <b>78.7</b> | <b>86.1</b> | <b>69.3</b> |
| <b>6.25</b>  | <b>96.3</b> | <b>99.4</b> | <b>91.1</b> |
| <b>3.125</b> | <b>100</b>  | <b>100</b>  | <b>100</b>  |
| <b>1.56</b>  | <b>100</b>  | <b>100</b>  | <b>100</b>  |
| <b>8a</b>    |             |             |             |
| <b>100</b>   | <b>45.9</b> | <b>42.6</b> | <b>39.4</b> |
| <b>50</b>    | <b>56.7</b> | <b>57.3</b> | <b>54.9</b> |
| <b>25</b>    | <b>68.3</b> | <b>69.5</b> | <b>72.1</b> |
| <b>12.5</b>  | <b>84.6</b> | <b>81.2</b> | <b>93.6</b> |
| <b>6.25</b>  | <b>99.2</b> | <b>92.4</b> | <b>100</b>  |
| <b>3.125</b> | <b>100</b>  | <b>100</b>  | <b>100</b>  |

|              |             |             |             |
|--------------|-------------|-------------|-------------|
| <b>1.56</b>  | <b>100</b>  | <b>100</b>  | <b>100</b>  |
| <b>8c</b>    |             |             |             |
| <b>100</b>   | <b>21.6</b> | <b>18.8</b> | <b>13.5</b> |
| <b>50</b>    | <b>28.4</b> | <b>26.7</b> | <b>22.3</b> |
| <b>25</b>    | <b>41.7</b> | <b>39.5</b> | <b>30.4</b> |
| <b>12.5</b>  | <b>50.3</b> | <b>52.6</b> | <b>45.1</b> |
| <b>6.25</b>  | <b>72.5</b> | <b>70.4</b> | <b>64.7</b> |
| <b>3.125</b> | <b>91.2</b> | <b>87.3</b> | <b>86.2</b> |
| <b>1.56</b>  | <b>100</b>  | <b>100</b>  | <b>98.6</b> |
| <b>8d</b>    |             |             |             |
| <b>100</b>   | <b>8.3</b>  | <b>4.7</b>  | <b>6.5</b>  |
| <b>50</b>    | <b>12.9</b> | <b>10.2</b> | <b>13.1</b> |
| <b>25</b>    | <b>21.5</b> | <b>16.5</b> | <b>20.8</b> |
| <b>12.5</b>  | <b>30.6</b> | <b>23.4</b> | <b>33.6</b> |
| <b>6.25</b>  | <b>54.8</b> | <b>41.6</b> | <b>48.7</b> |
| <b>3.125</b> | <b>62.2</b> | <b>58.1</b> | <b>63.3</b> |
| <b>1.56</b>  | <b>75.4</b> | <b>67.3</b> | <b>86.2</b> |

## B-Raf (V600E) Kinase activity assay

Compound 5a

IC<sub>50</sub> = 198.083 nM

| log10(Concentration nM) | % Remaining Activity |
|-------------------------|----------------------|
| 3.000                   | 13.88                |
| 2.699                   | 24.66                |
| 2.398                   | 43.56                |
| 2.097                   | 60.92                |
| 1.796                   | 77.62                |
| 1.495                   | 87.2                 |
| 1.194                   | 92.91                |
| 0.893                   | 97.83                |

### Raw Data

| Concentration (nM) | RLU1      | RLU2      | RLU Average |
|--------------------|-----------|-----------|-------------|
| 1000               | 22449.408 | 22461.294 | 22455.351   |
| 500                | 21389.873 | 21403.235 | 21396.554   |
| 250                | 19494.269 | 19506.369 | 19500.319   |
| 125                | 19484.682 | 19496.758 | 19490.72    |
| 62.5               | 17139.053 | 17148.549 | 17143.801   |
| 31.25              | 13208.111 | 13216.615 | 13212.363   |
| 15.625             | 12800.954 | 12809.675 | 12805.315   |
| 7.813              | 12071.476 | 12083.181 | 12077.329   |

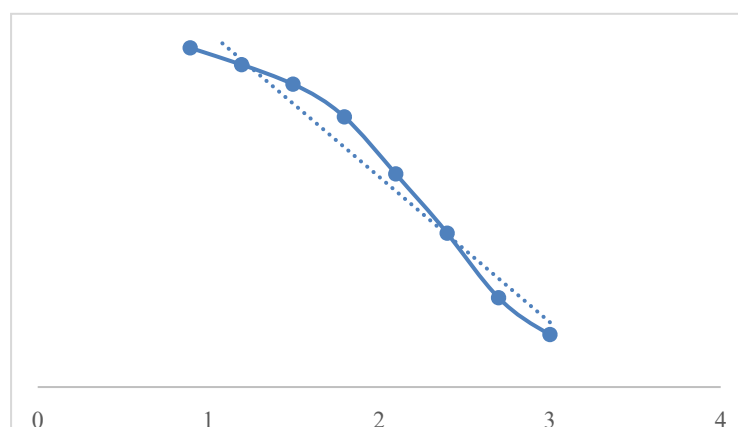

**Compound 5b****IC<sub>50</sub> = 113.246 nM**

| <b>log<sub>10</sub>(Concentration nM)</b> | <b>% Remaining Activity</b> |
|-------------------------------------------|-----------------------------|
| <b>3.000</b>                              | <b>10.74</b>                |
| <b>2.699</b>                              | <b>21.2</b>                 |
| <b>2.398</b>                              | <b>30.48</b>                |
| <b>2.097</b>                              | <b>38.26</b>                |
| <b>1.796</b>                              | <b>46.98</b>                |
| <b>1.495</b>                              | <b>59.24</b>                |
| <b>1.194</b>                              | <b>70.12</b>                |
| <b>0.893</b>                              | <b>78.15</b>                |

**Raw Data**

| <b>Concentration (nM)</b> | <b>RLU1</b>      | <b>RLU2</b>      | <b>RLU Average</b> |
|---------------------------|------------------|------------------|--------------------|
| <b>1000</b>               | <b>20406.304</b> | <b>20415.918</b> | <b>20411.111</b>   |
| <b>500</b>                | <b>19180.792</b> | <b>19192.928</b> | <b>19186.86</b>    |
| <b>250</b>                | <b>17223.061</b> | <b>17227.154</b> | <b>17225.108</b>   |
| <b>125</b>                | <b>16051.475</b> | <b>16060.174</b> | <b>16055.824</b>   |
| <b>62.5</b>               | <b>16087.629</b> | <b>16091.601</b> | <b>16089.615</b>   |
| <b>31.25</b>              | <b>12885.329</b> | <b>12889.634</b> | <b>12887.482</b>   |
| <b>15.625</b>             | <b>10344.167</b> | <b>10353.478</b> | <b>10348.823</b>   |
| <b>7.813</b>              | <b>8498.225</b>  | <b>8501.464</b>  | <b>8499.844</b>    |

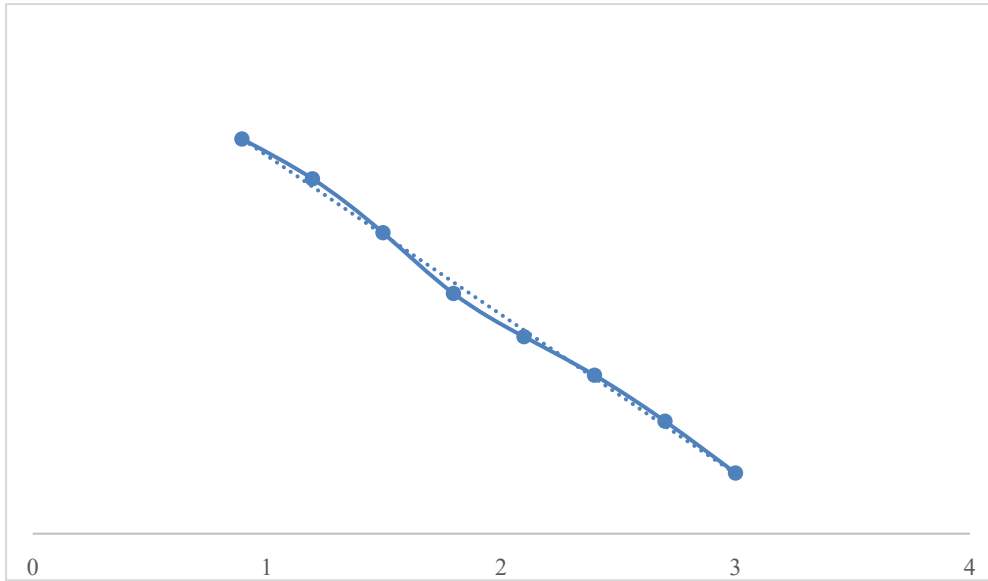

**Compound 5e**

**IC<sub>50</sub> = 78.107 nM**

| <b>log10(Concentration nM)</b> | <b>% Remaining Activity</b> |
|--------------------------------|-----------------------------|
| <b>3.000</b>                   | <b>6.76</b>                 |
| <b>2.699</b>                   | <b>10.13</b>                |
| <b>2.398</b>                   | <b>21.99</b>                |
| <b>2.097</b>                   | <b>36.16</b>                |
| <b>1.796</b>                   | <b>57.15</b>                |
| <b>1.495</b>                   | <b>71.67</b>                |
| <b>1.194</b>                   | <b>85.05</b>                |
| <b>0.893</b>                   | <b>93.58</b>                |

**Raw Data**

| <b>Concentration (nM)</b> | <b>RLU1</b>      | <b>RLU2</b>      | <b>RLU Average</b> |
|---------------------------|------------------|------------------|--------------------|
| <b>1000</b>               | <b>23831.335</b> | <b>23842.844</b> | <b>23837.089</b>   |
| <b>500</b>                | <b>22131.361</b> | <b>22140.138</b> | <b>22135.749</b>   |
| <b>250</b>                | <b>21766.495</b> | <b>21770.147</b> | <b>21768.321</b>   |
| <b>125</b>                | <b>20652.475</b> | <b>20655.652</b> | <b>20654.064</b>   |
| <b>62.5</b>               | <b>19659.879</b> | <b>19663.745</b> | <b>19661.812</b>   |
| <b>31.25</b>              | <b>15799.586</b> | <b>15811.674</b> | <b>15805.63</b>    |
| <b>15.625</b>             | <b>14719.145</b> | <b>14725.254</b> | <b>14722.199</b>   |
| <b>7.813</b>              | <b>10681.088</b> | <b>10691.66</b>  | <b>10686.374</b>   |

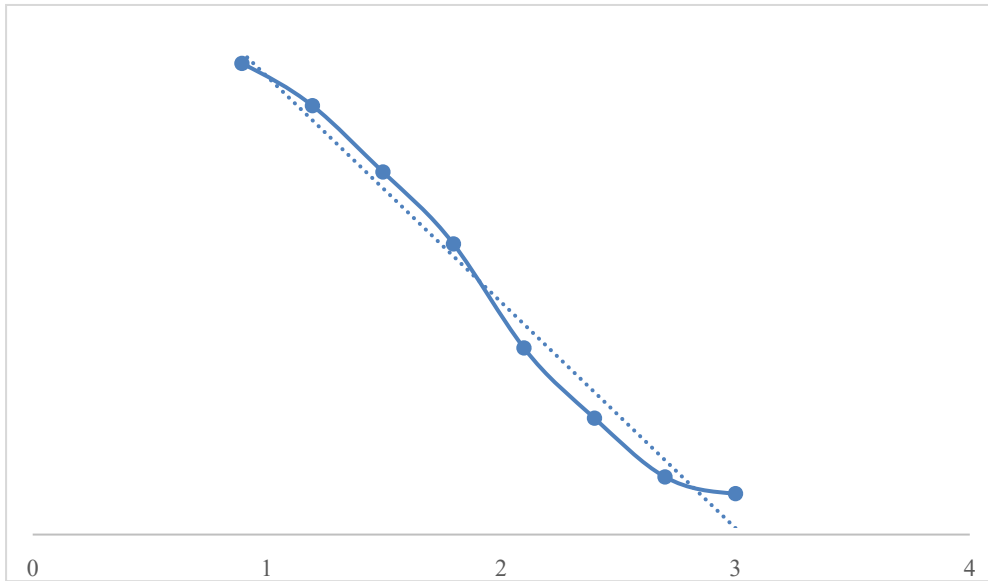

**Compound 6c**

**IC<sub>50</sub> = 253.532 nM**

| <b>log10(Concentration nM)</b> | <b>% Remaining Activity</b> |
|--------------------------------|-----------------------------|
| <b>3.000</b>                   | <b>15.64</b>                |
| <b>2.699</b>                   | <b>25.25</b>                |
| <b>2.398</b>                   | <b>30.86</b>                |
| <b>2.097</b>                   | <b>41.55</b>                |
| <b>1.796</b>                   | <b>47.5</b>                 |
| <b>1.495</b>                   | <b>55.9</b>                 |
| <b>1.194</b>                   | <b>65.81</b>                |
| <b>0.893</b>                   | <b>73.21</b>                |

**Raw Data**

| <b>Concentration (nM)</b> | <b>RLU1</b>      | <b>RLU2</b>      | <b>RLU Average</b> |
|---------------------------|------------------|------------------|--------------------|
| <b>1000</b>               | <b>25280.754</b> | <b>25292.818</b> | <b>25286.786</b>   |
| <b>500</b>                | <b>23768.61</b>  | <b>23777.31</b>  | <b>23772.96</b>    |
| <b>250</b>                | <b>21633.557</b> | <b>21639.194</b> | <b>21636.375</b>   |
| <b>125</b>                | <b>19917.353</b> | <b>19925.171</b> | <b>19921.262</b>   |
| <b>62.5</b>               | <b>18668.752</b> | <b>18678.816</b> | <b>18673.784</b>   |
| <b>31.25</b>              | <b>17726.404</b> | <b>17732.166</b> | <b>17729.285</b>   |
| <b>15.625</b>             | <b>14983.993</b> | <b>14989.945</b> | <b>14986.969</b>   |

| Concentration (nM) | RLU1      | RLU2      | RLU Average |
|--------------------|-----------|-----------|-------------|
| 7.813              | 13101.581 | 13106.334 | 13103.958   |

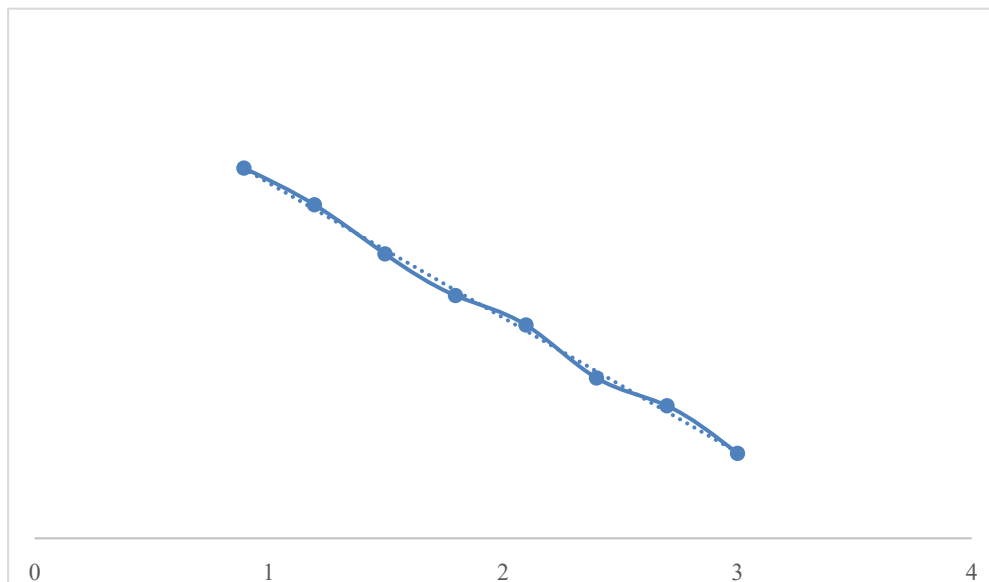

### Compound 6d

IC<sub>50</sub> = 45.471 nM

| log <sub>10</sub> (Concentration nM) | % Remaining Activity |
|--------------------------------------|----------------------|
| 3.000                                | 4.38                 |
| 2.699                                | 7.12                 |
| 2.398                                | 13.58                |
| 2.097                                | 22.83                |
| 1.796                                | 42.75                |
| 1.495                                | 60.85                |
| 1.194                                | 77.98                |
| 0.893                                | 87.89                |

### Raw Data

| Concentration (nM) | RLU1      | RLU2      | RLU Average |
|--------------------|-----------|-----------|-------------|
| 1000               | 24054.751 | 24057.656 | 24056.203   |
| 500                | 22580.85  | 22585.403 | 22583.127   |
| 250                | 21615.581 | 21619.454 | 21617.517   |
| 125                | 18864.656 | 18869.863 | 18867.26    |
| 62.5               | 16756.209 | 16769.798 | 16763.004   |

| Concentration (nM) | RLU1      | RLU2      | RLU Average |
|--------------------|-----------|-----------|-------------|
| 31.25              | 17091.597 | 17099.492 | 17095.544   |
| 15.625             | 18612.07  | 18621.715 | 18616.893   |
| 7.813              | 12642.786 | 12652.763 | 12647.774   |

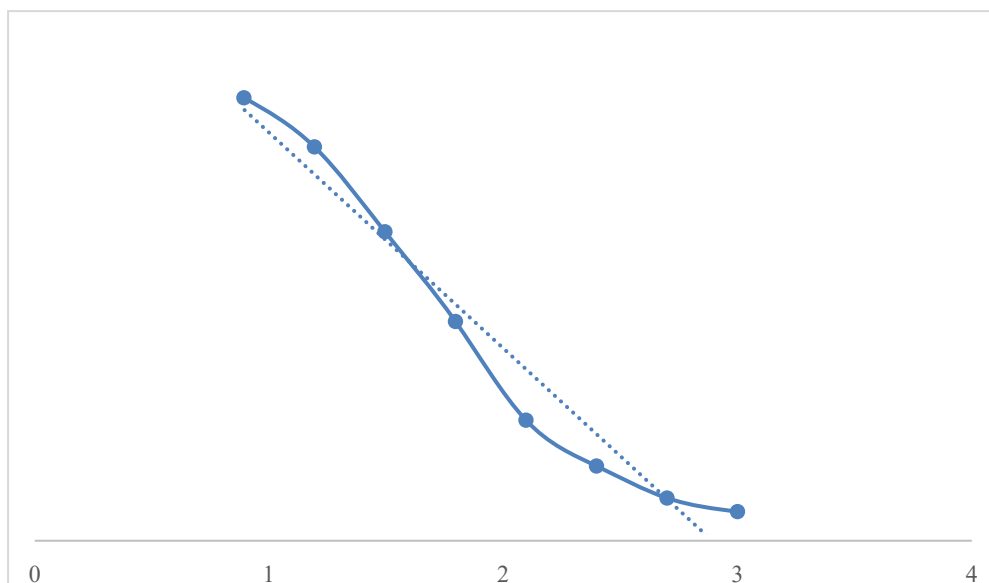

### Compound 6f

$IC_{50} = 57.694$  nM

| log10(Concentration nM) | % Remaining Activity |
|-------------------------|----------------------|
| 3.000                   | 2.68                 |
| 2.699                   | 6.69                 |
| 2.398                   | 18.59                |
| 2.097                   | 28.83                |
| 1.796                   | 45.87                |
| 1.495                   | 64.51                |
| 1.194                   | 79.25                |
| 0.893                   | 89.45                |

### Raw Data

| Concentration (nM) | RLU1      | RLU2      | RLU Average |
|--------------------|-----------|-----------|-------------|
| 1000               | 21313.106 | 21321.299 | 21317.203   |
| 500                | 20017.924 | 20020.409 | 20019.166   |
| 250                | 18392.321 | 18402.959 | 18397.64    |

| Concentration (nM) | RLU1      | RLU2      | RLU Average |
|--------------------|-----------|-----------|-------------|
| 125                | 18032.245 | 18041.065 | 18036.655   |
| 62.5               | 16960.387 | 16962.632 | 16961.509   |
| 31.25              | 16641.369 | 16650.795 | 16646.082   |
| 15.625             | 12085.157 | 12088.058 | 12086.607   |
| 7.813              | 12936.929 | 12949.085 | 12943.007   |

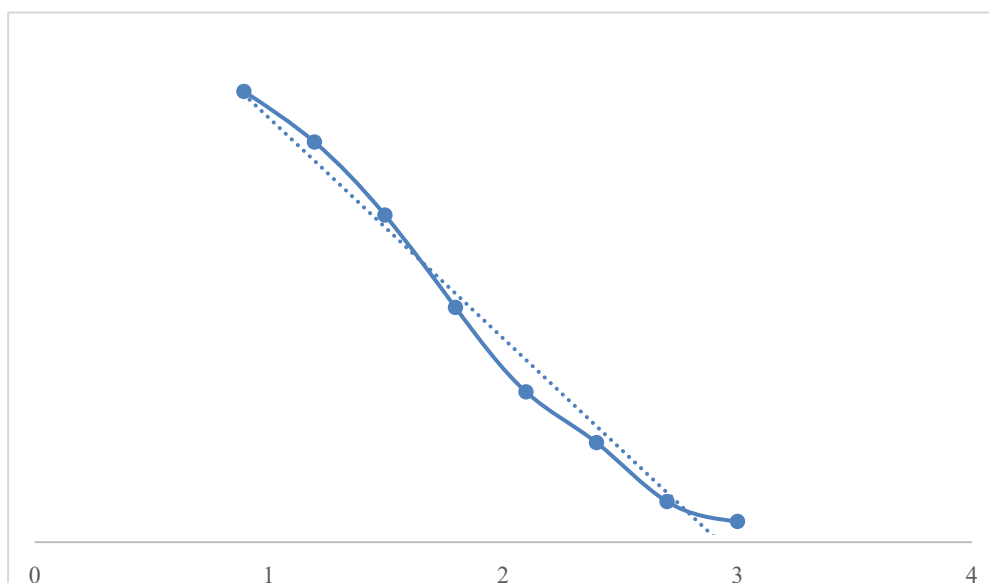

### Compound Vemurafenib

$IC_{50} = 41.382$  nM

| log10(Concentration nM) | % Remaining Activity |
|-------------------------|----------------------|
| 3.000                   | 3.08                 |
| 2.699                   | 5.03                 |
| 2.398                   | 12.55                |
| 2.097                   | 23.5                 |
| 1.796                   | 38.01                |
| 1.495                   | 58.58                |
| 1.194                   | 73.7                 |
| 0.893                   | 84.51                |

### Raw Data

| Concentration (nM) | RLU1      | RLU2      | RLU Average |
|--------------------|-----------|-----------|-------------|
| 1000               | 20569.414 | 20571.795 | 20570.604   |

| Concentration (nM) | RLU1      | RLU2      | RLU Average |
|--------------------|-----------|-----------|-------------|
| 500                | 18774.105 | 18780.335 | 18777.22    |
| 250                | 16840.236 | 16847.761 | 16843.999   |
| 125                | 15977.821 | 15989.711 | 15983.766   |
| 62.5               | 16891.102 | 16895.663 | 16893.383   |
| 31.25              | 14712.597 | 14717.96  | 14715.278   |
| 15.625             | 12275.764 | 12278.795 | 12277.279   |
| 7.813              | 8648.497  | 8655.406  | 8651.951    |

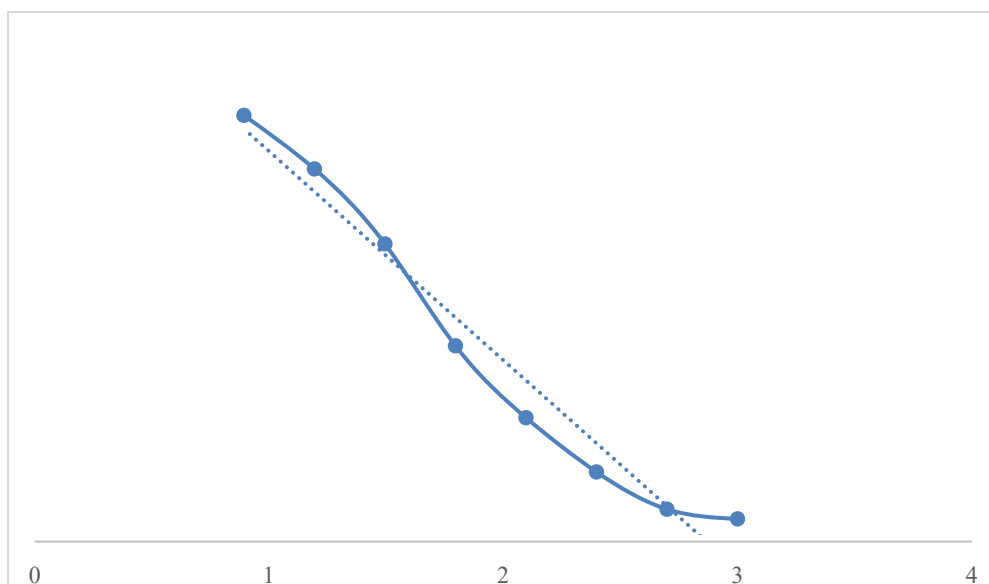

### EGFR Kinase activity assay

Compound 6c

IC<sub>50</sub> = 22.904 nM

| Log Concentration (nM) | % Remaining Activity |
|------------------------|----------------------|
| 1.699                  | 23.21                |
| 1.398                  | 41.87                |
| 1.097                  | 64.92                |
| 0.796                  | 75.84                |
| 0.495                  | 84.13                |
| 0.194                  | 91.62                |
| -0.107                 | 95.48                |

### Raw Data

| Concentration (nM) | RLU1      | RLU2      | RLU Average |
|--------------------|-----------|-----------|-------------|
| 50.000             | 14823.462 | 14796.118 | 14809.790   |
| 25.000             | 18291.337 | 18318.904 | 18305.121   |
| 12.500             | 21987.554 | 21942.119 | 21964.836   |
| 6.250              | 25648.771 | 25611.309 | 25630.040   |
| 3.125              | 28792.448 | 28821.903 | 28807.176   |
| 1.563              | 31488.204 | 31455.736 | 31471.970   |
| 0.781              | 33291.661 | 33324.190 | 33307.926   |

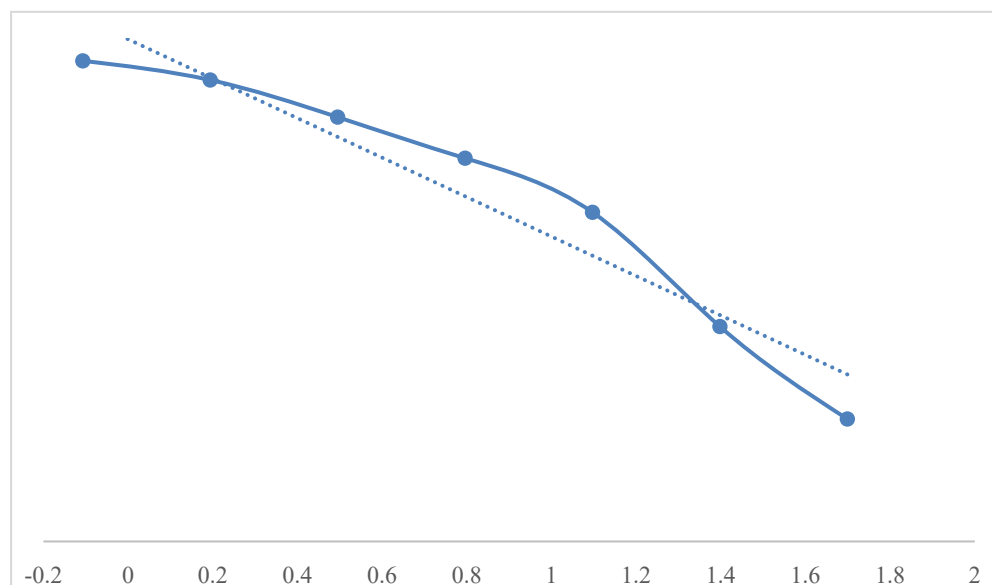

### Compound 6d

$IC_{50} = 7.175$  nM

| Log Concentration (nM) | % Remaining Activity |
|------------------------|----------------------|
| 1.699                  | 32.11                |
| 1.398                  | 41.67                |
| 1.097                  | 54.83                |
| 0.796                  | 69.92                |
| 0.495                  | 83.76                |
| 0.194                  | 92.28                |
| -0.107                 | 97.01                |

### Raw Data

| Concentration (nM) | RLU1      | RLU2      | RLU Average |
|--------------------|-----------|-----------|-------------|
| 50.000             | 10124.739 | 10157.382 | 10141.061   |
| 25.000             | 13694.551 | 13621.984 | 13658.268   |
| 12.500             | 17942.116 | 18003.748 | 17972.932   |
| 6.250              | 22984.503 | 22891.447 | 22937.975   |
| 3.125              | 27416.338 | 27521.774 | 27469.056   |
| 1.563              | 31684.990 | 31593.214 | 31639.102   |
| 0.781              | 34622.731 | 34541.893 | 34582.312   |

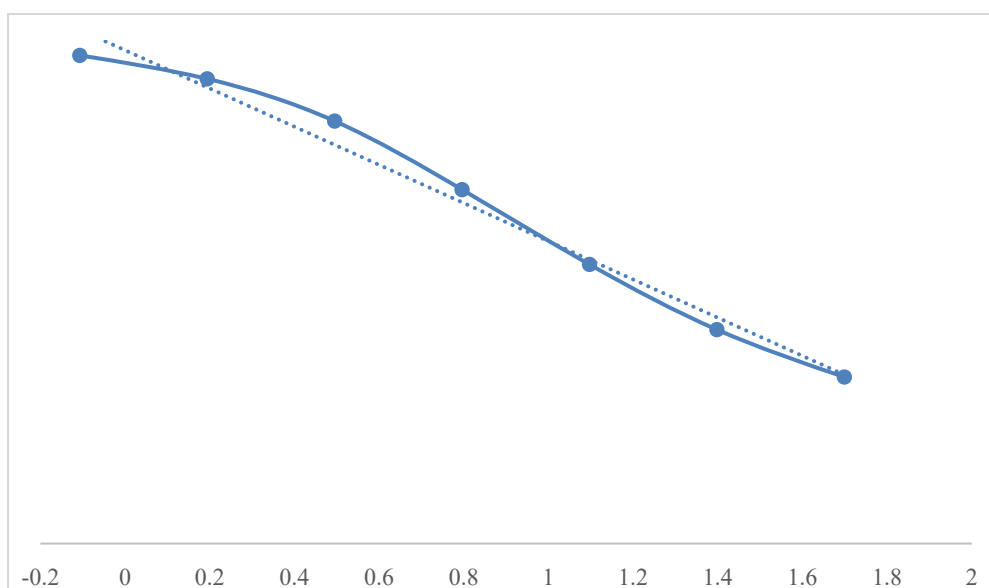

### Compound 6f

IC<sub>50</sub> = 11.483 nM

| Log Concentration (nM) | % Remaining Activity |
|------------------------|----------------------|
| 1.699                  | 28.94                |
| 1.398                  | 39.72                |
| 1.097                  | 52.88                |
| 0.796                  | 67.93                |
| 0.495                  | 81.46                |
| 0.194                  | 90.17                |
| -0.107                 | 96.08                |

### Raw Data

| Concentration (nM) | RLU1      | RLU2      | RLU Average |
|--------------------|-----------|-----------|-------------|
| 50.000             | 8421.774  | 8463.291  | 8442.533    |
| 25.000             | 11894.563 | 11842.119 | 11868.341   |
| 12.500             | 16273.908 | 16344.517 | 16309.213   |
| 6.250              | 21482.664 | 21413.552 | 21448.108   |
| 3.125              | 26891.406 | 26962.771 | 26927.089   |
| 1.563              | 31974.285 | 31892.416 | 31933.351   |
| 0.781              | 35641.907 | 35722.364 | 35682.136   |

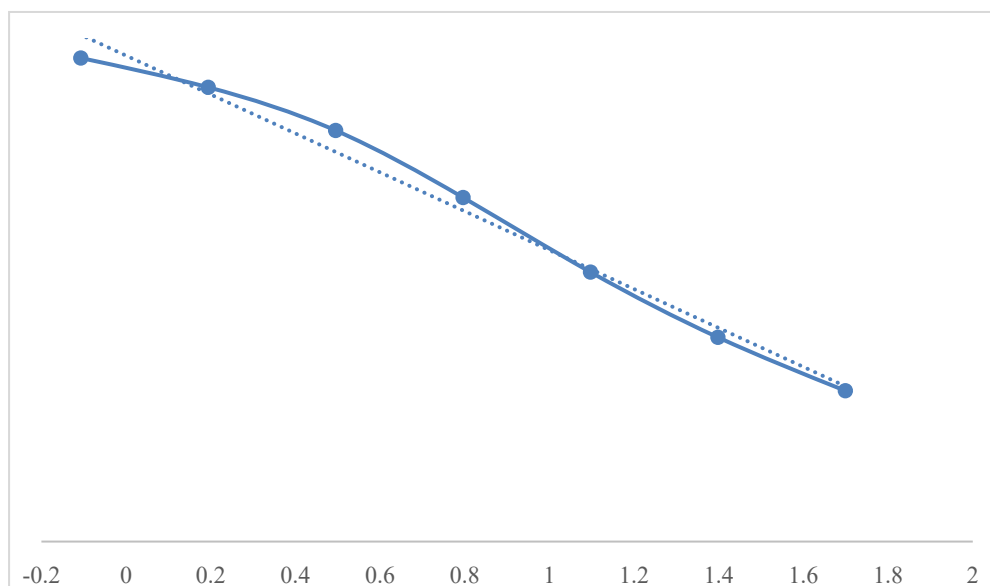

### Compound 5a

$IC_{50} = 56.772$  nM

| Log Concentration (nM) | % Remaining Activity |
|------------------------|----------------------|
| 1.699                  | 44.43                |
| 1.398                  | 56.88                |
| 1.097                  | 71.96                |
| 0.796                  | 85.94                |
| 0.495                  | 89.91                |
| 0.194                  | 93.62                |
| -0.107                 | 97.44                |

### Raw Data

| Concentration (nM) | RLU1      | RLU2      | RLU Average |
|--------------------|-----------|-----------|-------------|
| 50.000             | 25114.773 | 25068.442 | 25091.608   |
| 25.000             | 26983.116 | 27041.552 | 27012.334   |
| 12.500             | 28762.904 | 28691.337 | 28727.121   |
| 6.250              | 30194.447 | 30241.993 | 30218.220   |
| 3.125              | 31642.558 | 31588.224 | 31615.391   |
| 1.563              | 32941.772 | 33012.489 | 32977.131   |
| 0.781              | 34288.631 | 34231.904 | 34260.268   |

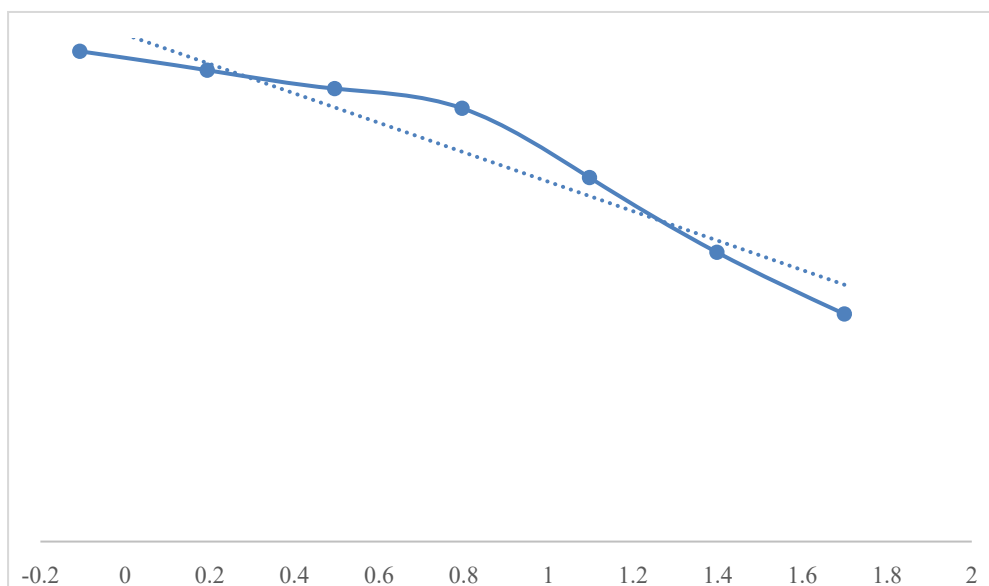

### Compound 5b

$IC_{50} = 53.259$  nM

| Log Concentration (nM) | % Remaining Activity |
|------------------------|----------------------|
| 1.699                  | 53.12                |
| 1.398                  | 57.84                |
| 1.097                  | 62.61                |
| 0.796                  | 76.73                |
| 0.495                  | 80.68                |
| 0.194                  | 94.31                |
| -0.107                 | 97.89                |

### Raw Data

| Concentration (nM) | RLU1      | RLU2      | RLU Average |
|--------------------|-----------|-----------|-------------|
| 50.000             | 26391.482 | 26441.773 | 26416.628   |
| 25.000             | 27984.631 | 27921.294 | 27952.963   |
| 12.500             | 29641.904 | 29712.558 | 29677.231   |
| 6.250              | 31294.337 | 31352.119 | 31323.228   |
| 3.125              | 32841.775 | 32791.462 | 32816.619   |
| 1.563              | 34112.663 | 34171.228 | 34141.946   |
| 0.781              | 35491.904 | 35421.337 | 35456.621   |

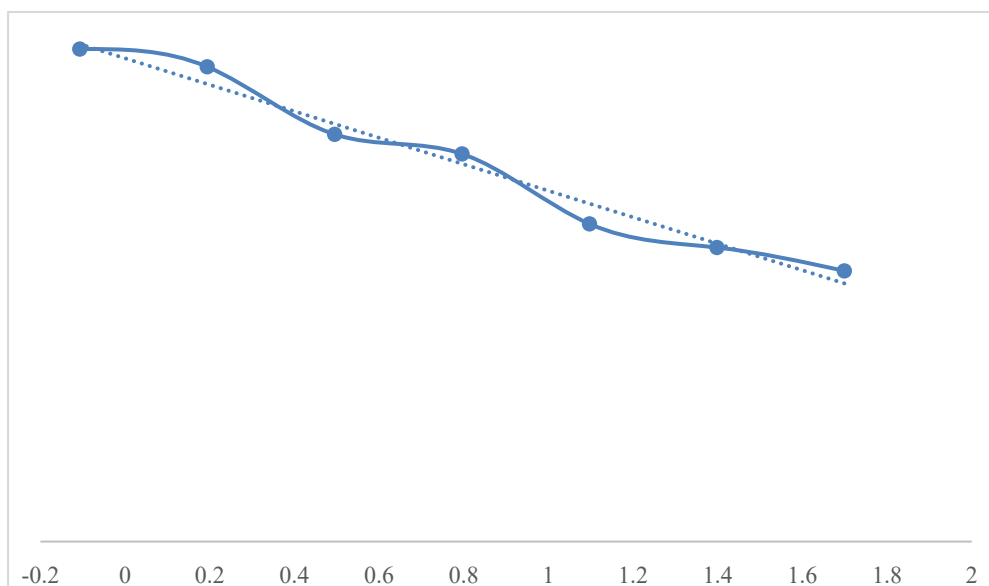

### Compound 5e

$IC_{50} = 39.861 \text{ nM}$

| Log Concentration (nM) | % Remaining Activity |
|------------------------|----------------------|
| 1.699                  | 31.84                |
| 1.398                  | 57.91                |
| 1.097                  | 64.88                |
| 0.796                  | 81.46                |
| 0.495                  | 87.93                |
| 0.194                  | 92.64                |
| -0.107                 | 97.12                |

### Raw Data

| Concentration (nM) | RLU1      | RLU2      | RLU Average |
|--------------------|-----------|-----------|-------------|
| 50.000             | 21492.773 | 21541.338 | 21517.056   |
| 25.000             | 23741.904 | 23688.229 | 23715.067   |
| 12.500             | 25984.116 | 26051.447 | 26017.782   |
| 6.250              | 28341.662 | 28271.993 | 28306.828   |
| 3.125              | 30612.489 | 30684.771 | 30648.630   |
| 1.563              | 32794.338 | 32741.906 | 32768.122   |
| 0.781              | 34921.774 | 34852.119 | 34886.947   |

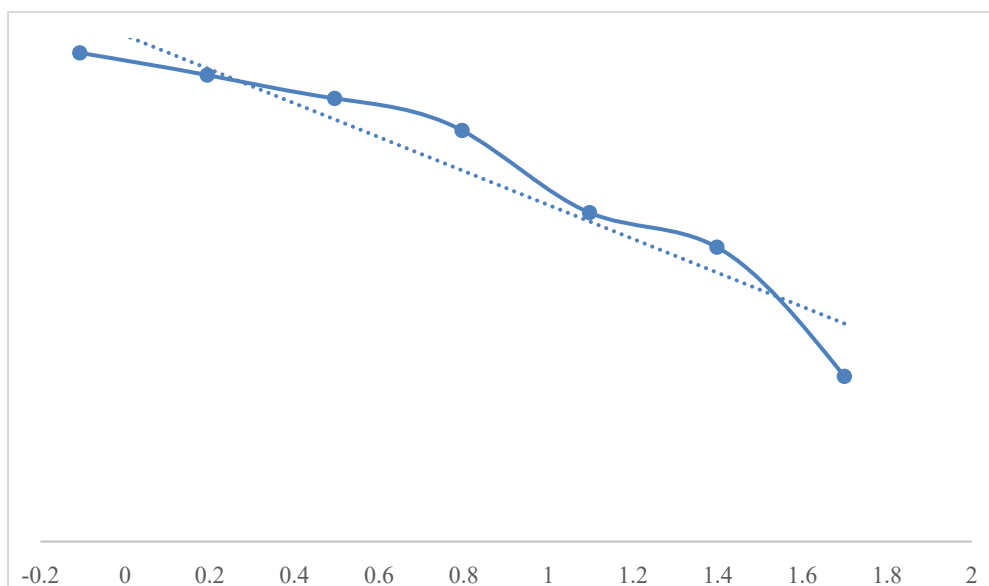

### Compound Erlotinib

$IC_{50} = 5.392$  nM

| Log Concentration (nM) | % Remaining Activity |
|------------------------|----------------------|
| 1.699                  | 18.94                |
| 1.398                  | 26.73                |
| 1.097                  | 38.61                |
| 0.796                  | 52.44                |
| 0.495                  | 68.92                |
| 0.194                  | 83.71                |
| -0.107                 | 92.84                |

### Raw Data

| Concentration (nM) | RLU1      | RLU2      | RLU Average |
|--------------------|-----------|-----------|-------------|
| 50.000             | 6421.884  | 6462.337  | 6442.111    |
| 25.000             | 8241.663  | 8196.294  | 8218.979    |
| 12.500             | 11094.772 | 11141.906 | 11118.339   |
| 6.250              | 15182.441 | 15241.993 | 15212.217   |
| 3.125              | 20491.338 | 20542.774 | 20517.056   |
| 1.563              | 26894.229 | 26941.884 | 26918.057   |
| 0.781              | 31841.906 | 31794.552 | 31818.229   |

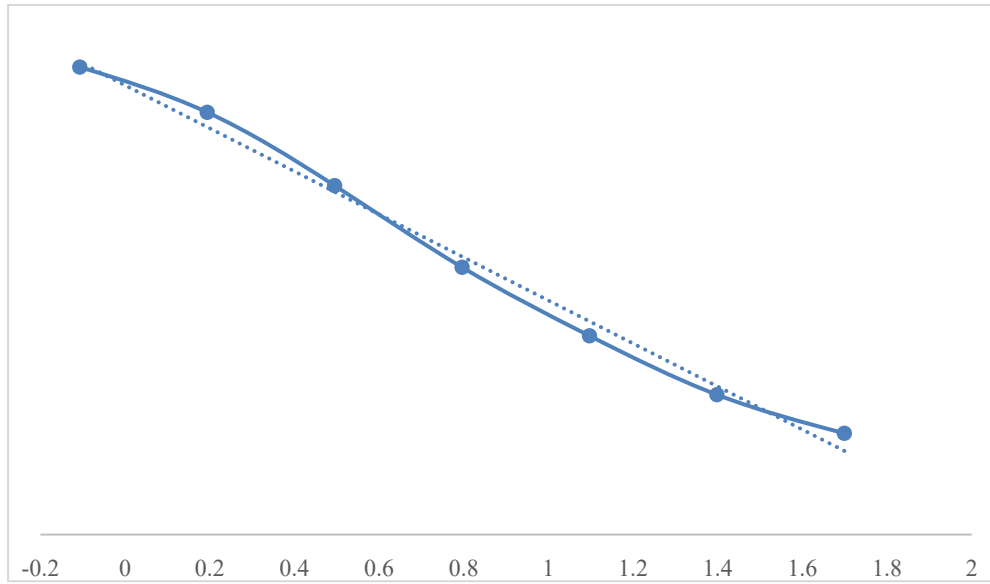

### ADMET of Compound 8d

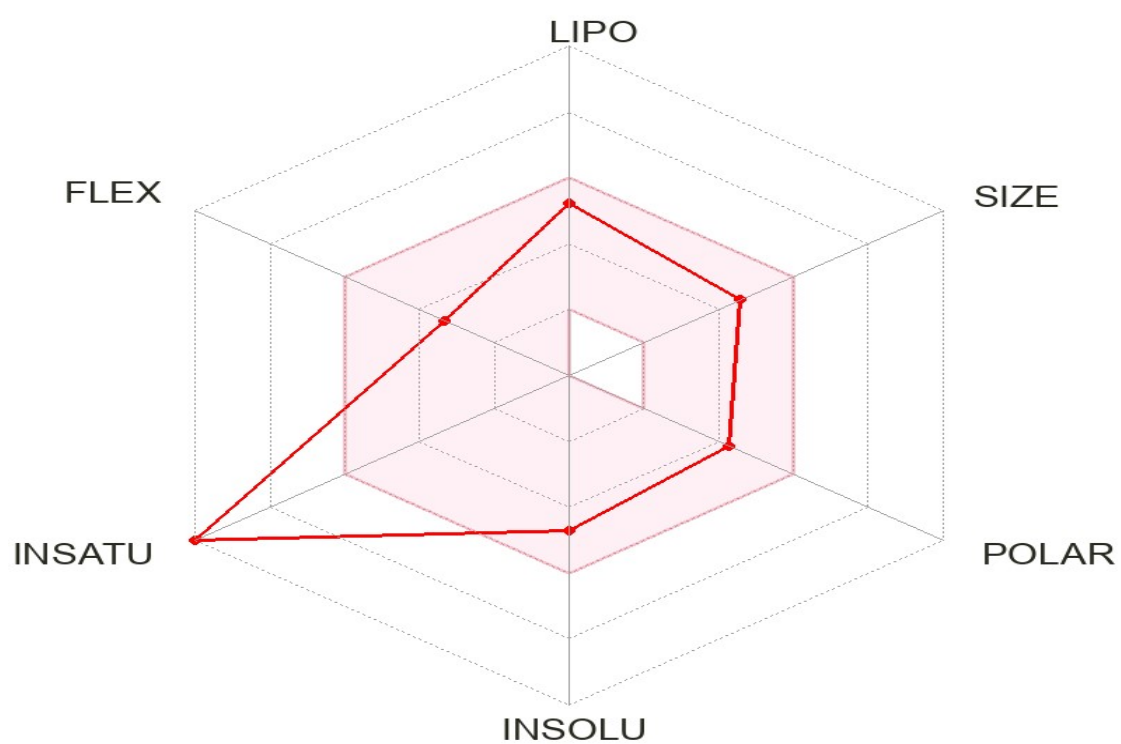

### Physicochemical Properties

|                  |                                                    |
|------------------|----------------------------------------------------|
| Formula          | C <sub>20</sub> H <sub>14</sub> ClN <sub>5</sub> O |
| Molecular weight | 375.81 g/mol                                       |

|                                                                                        |                      |
|----------------------------------------------------------------------------------------|----------------------|
| Num. heavy atoms                                                                       | 27                   |
| Num. arom. heavy atoms                                                                 | 21                   |
| Fraction Csp3                                                                          | 0.00                 |
| Num. rotatable bonds                                                                   | 5                    |
| Num. H-bond acceptors                                                                  | 4                    |
| Num. H-bond donors                                                                     | 2                    |
| Molar Refractivity                                                                     | 105.50               |
| TPSA  | 83.03 Å <sup>2</sup> |

### Lipophilicity

|                                                                                                                |      |
|----------------------------------------------------------------------------------------------------------------|------|
| Log $P_{o/w}$ (iLOGP)        | 2.12 |
| Log $P_{o/w}$ (XLOGP3)      | 3.62 |
| Log $P_{o/w}$ (WLOGP)       | 4.04 |
| Log $P_{o/w}$ (MLOGP)       | 2.76 |
| Log $P_{o/w}$ (SILICOS-IT)  | 4.62 |
| Consensus Log $P_{o/w}$     | 3.43 |

### Water Solubility

|                                                                                                  |                                 |
|--------------------------------------------------------------------------------------------------|---------------------------------|
| Log S (ESOL)  | -4.70                           |
| Solubility                                                                                       | 7.56e-03 mg/ml ; 2.01e-05 mol/l |
| Class         | Moderately soluble              |
| Log S (Ali)   | -5.05                           |
| Solubility                                                                                       | 3.34e-03 mg/ml ; 8.89e-06 mol/l |

|                                                                                                      |                                 |
|------------------------------------------------------------------------------------------------------|---------------------------------|
| Class               | Moderately soluble              |
| Log S (SILICOS-IT)  | -8.22                           |
| Solubility                                                                                           | 2.24e-06 mg/ml ; 5.97e-09 mol/l |
| Class               | Poorly soluble                  |

### Pharmacokinetics

|                                                                                                                 |            |
|-----------------------------------------------------------------------------------------------------------------|------------|
| GI absorption                  | High       |
| BBB permeant                 | No         |
| P-gp substrate               | No         |
| CYP1A2 inhibitor             | Yes        |
| CYP2C19 inhibitor            | Yes        |
| CYP2C9 inhibitor             | Yes        |
| CYP2D6 inhibitor             | Yes        |
| CYP3A4 inhibitor             | No         |
| Log $K_p$ (skin permeation)  | -6.02 cm/s |

### Drug Likness

|                                                                                              |                  |
|----------------------------------------------------------------------------------------------|------------------|
| Lipinski  | Yes; 0 violation |
| Ghose     | Yes              |
| Veber     | Yes              |

|                                                                                                         |      |
|---------------------------------------------------------------------------------------------------------|------|
| Egan                   | Yes  |
| Muegge                 | Yes  |
| Bioavailability Score  | 0.55 |

### Medicinal Chemistry

|                                                                                                             |                                                                                                      |
|-------------------------------------------------------------------------------------------------------------|------------------------------------------------------------------------------------------------------|
| PAINS                     | 0 alert                                                                                              |
| Brenk                    | 1 alert: imine_1  |
| Lead likeness            | No; 2 violations: MW>350, XLOGP3>3.5                                                                 |
| Synthetic accessibility  | 2.76                                                                                                 |

## **Appendix A**

### **4. EXPERIMENTAL**

#### **4.1. Chemistry**

##### **Materials and methods**

All reagents and solvents were of general purpose or analytical grade and purchased from Sigma Aldrich Ltd, Fisher Scientific, Fluka and Acros. <sup>1</sup>H and <sup>13</sup>C NMR spectra were recorded with a Bruker Avance III spectrometer operating at 400, 100 MHz respectively, with Me<sub>4</sub>Si as internal standard and DMSO-d<sub>6</sub> as a solvent. Elemental analysis was performed by the regional center for mycology and biotechnology (Cairo, Egypt). TLC was carried out on precoated silica plates (Keisel gel 60 F254, BDH) using Hexane: Ethyl acetate, 1 : 2, v/v. Compounds were visualized by illumination under UV light (254 nm). Melting points were determined on an electrothermal instrument and are uncorrected. All solvents were dried prior to use and stored over 4 Å molecular sieves, under nitrogen. All the compounds were ≥ 95% pure.

#### **4.2. Biological evaluation**

##### **4.2.1 Cell Viability assay (MTT assay)**

MTT assay was performed to investigate the effect of the synthesized compounds on mammary epithelial cells (MCF-10A). The cells were propagated in medium consisting of Ham's F-12 medium/ Dulbecco's modified Eagle's medium (DMEM) (1:1) supplemented with 10% foetal calf serum (GIBCO, UK), 2 mM glutamine, insulin (10 µg/mL), hydrocortisone (500 ng/mL) and epidermal growth factor (20 ng/mL). Trypsin ethylenediamine tetra acetic acid (EDTA) was used to passage the cells after every 2-3 days. 96-well flat-bottomed cell culture plates were used to seed the cells at a density of  $10^4$  cells mL<sup>-1</sup>. The medium was aspirated from all the wells of culture plates after 24 h followed by the addition of synthesized compounds (in 200 µL medium to yield a final concentration of 0.1% (v/v) dimethyl sulfoxide) into individual wells of the plates. Four wells were designated to a single compound. The plates were allowed to incubate at 37°C for 96 h. Afterwards, the medium was aspirated and 3-[4,5-dimethylthiazol-2-yl]-2,5-diphenyltetrazolium bromide (MTT) (0.4 mg/mL) in medium was added to each well and subsequently incubated for 3 h. The medium was aspirated and 150 µL dimethyl sulfoxide (DMSO) was added to each well. The plates were vortexed followed by the measurement of absorbance at 540 nm on a microplate reader. The results were presented as inhibition (%) of proliferation in contrast to controls comprising 0.1% DMSO.

#### **4.2.2. Assay for antiproliferative effect**

To explore the antiproliferative potential of compounds propidium iodide fluorescence assay was performed using different cell lines such as Panc-1 (pancreas cancer cell line) [Panc-1-CTC (RRID:CVCL\_VQ69)], MCF-7 (breast cancer cell line) [MCF-7 (RRID:CVCL\_0031)], HT-29 (colon cancer cell line) [HT-29 (RRID:CVCL\_0320)] and A-549 (epithelial cancer cell line)[A-549 (RRID:CVCL\_0023)], respectively. All cell lines were obtained from ATCC (American Type Cell Culture).

To calculate the total nuclear DNA, a fluorescent dye (propidium iodide, PI) is used which can attach to the DNA, thus offering a quick and precise technique. PI cannot pass through the cell membrane and its signal intensity can be considered as directly proportional to quantity of cellular DNA. Cells whose cell membranes are damaged or have changed permeability are counted as dead ones. The assay was performed by seeding the cells of different cell lines at a density of 3000-7500 cells/well (in 200  $\mu$ l medium) in culture plates followed by incubation for 24 h at 37 °C in humidified 5% CO<sub>2</sub> /95% air atmospheric conditions. The medium was removed; the compounds were added to the plates at 10  $\mu$ M concentrations (in 0.1% DMSO) in triplicates, followed by incubation for 48 h. DMSO (0.1%) was used as control. After incubation, medium was removed followed by the addition of PI (25  $\mu$ l, 50  $\mu$ g/mL in water/medium) to each well of the plates. At -80 °C, the plates were allowed to freeze for 24 h, followed by thawing at 25 °C. A fluorometer (Polar-Star BMG Tech) was used to record the readings at excitation and emission wavelengths of 530 and 620 nm for each well. The percentage cytotoxicity of compounds was calculated using the following formula:

$$\% \text{ Cytotoxicity} = \frac{A_C - A_{TC}}{A_C} \times 100$$

Where  $A_{TC}$ = Absorbance of treated cells and  $A_C$ = Absorbance of control. Erlotinib was used as positive control in the assay.

#### **4.2.3. EGFR inhibitory assay**

Baculoviral expression vectors including pBlueBacHis2B and pFASTBacHTc were used separately to clone 1.6 kb cDNA coding for EGFR cytoplasmic domain (EGFR-CD, amino acids 645–1186). 5' upstream to the EGFR sequence comprised a sequence that encoded (His)<sub>6</sub>. Sf-9 cells were infected for 72h for protein expression. The pellets of Sf-9 cells were solubilized in a buffer containing sodium vanadate (100  $\mu$ M),

aprotinin (10 µg/mL), triton (1%), HEPES buffer(50mM), ammonium molybdate (10 µM), benzamidine HCl (16 µg/mL), NaCl (10 mM),leupeptin (10 µg/mL) and pepstatin (10 µg/mL) at 0°C for 20 min at pH 7.4, followed by centrifugation for 20 min. To eliminate the nonspecifically bound material, a Ni-NTA super flow packed column was used to pass through and wash the crude extract supernatant first with 10mM and then with 100 mM imidazole. Histidine-linked proteins were first eluted with 250 and then with 500 mM imidazole subsequent to dialysis against NaCl (50 mM), HEPES (20 mM), glycerol (10%) and 1 µg/mL each of aprotinin, leupeptin and pepstatin for 120 min. The purification was performed either at 4 °C or on ice. To record autophosphorylation level, EGFR kinase assay was carried out on the basis of DELFIA/Time-Resolved Fluorometry. The compounds were first dissolved in DMSO absolute, subsequent to dilution to appropriate concentration using HEPES (25 mM) at pH 7.4. Each compound (10 µL) was incubated with recombinant enzyme (10 µL, 5 ng for EGFR, 1:80 dilution in 100 mM HEPES) for 10 min at 25°C, subsequent to the addition of 5X buffer (10 µL, containing 2 mM MnCl<sub>2</sub>, 100 µM Na<sub>3</sub>VO<sub>4</sub>, 20 mM HEPES and 1 mM DTT) and ATP-MgCl<sub>2</sub> (20 µL, containing 0.1 mM ATP and 50 mM MgCl<sub>2</sub>) and incubation for 1h. The negative and positive controls were included in each plate by the incubation of enzyme either with or without ATP-MgCl<sub>2</sub>. The liquid was removed after incubation, and the plates were washed thrice using a wash buffer. The Europium-tagged antiphosphotyrosine antibody (75 µL, 400 ng) was added to each well followed by incubation of 1h and then washing of the plates using buffer. The enhancement solution was added to each well and the signal was recorded at excitation and emission wavelengths of 340 at 615 nm. The autophosphorylation percentage inhibition by compounds was calculated using the following equation:

$$100\% - [(negative\ control)/(positive\ control) - (negative\ control)]$$

Using the curves of percentage inhibition of eight concentrations of each compound, IC50 was calculated. The majority of signals detected by antiphosphotyrosine antibody were from EGFR because the enzyme preparation contained low impurities.

#### **4.2.4. BRAF<sup>V600E</sup> inhibitory assay**

V<sup>600E</sup> mutant BRAF kinase assay was performed to investigate the activity of tested compounds against BRAF. Mouse full-length GST-tagged BRAF<sup>V600E</sup> (7.5 ng, Invitrogen, PV3849) was pre-incubated with drug (1 μL) and assay dilution buffer (4 μL) for 60 min at 25°C. In assay dilution buffer, a solution (5 μL) containing MgCl<sub>2</sub> (30 mM), ATP (200 μM), recombinant human full length (200 ng) and *N*-terminal His-tagged MEK1 (Invitrogen) was added to start the assay, subsequent to incubation for 25 min at 25°C. The assay was stopped using 5X protein denaturing buffer (LDS) solution (5 μL). To further denature the protein, heat (70° C) was applied for 5 min. 4-12% precast Nu-Page gel plates (Invitrogen) were used to carry out electrophoresis (at 200 V). 10 μL of each reaction was loaded into the precast plates and electrophoresis was allowed to proceed. After completion of electrophoresis, the front part of the precast gel plate (holding hot ATP) was cut and afterwards cast-off. The dried gel was developed using a phosphor screen. A reaction without active enzyme was used as negative control while that containing no inhibitor served as positive control. To study the effect of compounds on cell-based pERK1/2 activity in cancer cells, commercially available ELISA kits (Invitrogen) were used according to manufacturer's instructions.

#### **4.2.5. Caspase-3 activation assay**

Allow all reagents to reach room temperature before use. Gently mix all liquid reagents prior to use. Determine the number of 8-well strips needed for the assay. Insert these in

the frame(s) for current use. Add 100  $\mu$ l of the *Standard Diluent Buffer* to the zero standard wells. Well(s) reserved for chromogen blank should be left empty. Add 100  $\mu$ l of standards and controls or diluted samples to the appropriate microtiter wells. The sample dilution chosen should be optimized for each experimental system. Tap gently on side of plate to mix. Cover wells with *plate cover* and incubate for 2 hours at room temperature. Thoroughly aspirate or decant solution from wells and discard the liquid, Wash wells 4 times. Pipette 100  $\mu$ l of *Caspase-3 (Active) Detection Antibody* solution into each well except the chromogen blank(s). Tap gently on the side of the plate to mix. Cover plate with *plate cover* and incubate for 1 hour at room temperature. Thoroughly aspirate or decant solution from wells and discard the liquid, Wash wells 4 times. Add 100  $\mu$ l Anti-Rabbit IgG HRP Working Solution to each well except the chromogen blank(s). Prepare the working dilution as described in Preparing IgG HRP. Cover wells with the *plate cover* and incubate for 30 minutes at room temperature. Thoroughly aspirate or decant solution from wells and discard the liquid. Wash wells 4 times. Add 100  $\mu$ l of *Stabilized Chromogen* to each well. The liquid in the wells will begin to turn blue. Incubate for 30 minutes at room temperature and in the dark. The incubation time for chromogen substrate is often determined by the microtiter plate reader used. Many plate readers have the capacity to record a maximum optical density (O.D.) of 2.0. The O.D. values should be monitored, and the substrate reaction stopped before the O.D. of the positive wells exceeds the limits of the instrument. The O.D. values at 450 nm can only be read after the *Stop Solution* has been added to each well. If using a reader that records only to 2.0 O.D., stopping the assay after 20 to 25 minutes is suggested. Add 100  $\mu$ l of *Stop Solution* to each well. Tap side of plate gently to mix. The solution in the wells should change from blue to yellow. Read the absorbance of each well at 450 nm having blanked the plate reader against a chromogen blank

composed of 100 µl each of *Stabilized Chromogen* and *Stop Solution*. Read the plate within 2 hours after adding the *Stop Solution*. Use a curve fitting software to generate the standard curve. A four-parameter algorithm provides the best standard curve fit. Read the concentrations for unknown samples and controls from the standard curve. Multiply value(s) obtained for sample(s) by the appropriate dilution factor to correct for the dilution in step 3. Samples producing signals greater than that of the highest standard should be diluted in *Standard Diluent Buffer* and reanalyzed.

#### **4.2.6. Caspase-8/9 activation assay**

Cells were obtained from American Type Culture Collection, cells were grown in RPMI 1640 containing 10% fetal bovine serum at 37°C, stimulated with the compounds to be tested for caspase 8/9, and lysed with Cell Extraction Buffer. This lysate was diluted in Standard Diluent Buffer over the range of the assay and measured for human active caspase-8/9 content. (*Cells are Plated in a density of  $1.2 - 1.8 \times 10,000$  cells/well in a volume of 100µl complete growth medium + 100 ul of the tested compound per well in a 96-well plate for 24 hours before the enzyme assay*). The absorbance of each microwell was read on a spectro-photometer at 450 nm. A standard curve is prepared from 7 human Caspase-8/9 standard dilutions and human Caspase-8/9 concentration determined.

#### **4.2.7. Bax activation assay**

Bring all reagents, except the human Bax-α Standard, to room temperature for at least 30 minutes prior to opening. The human Bax-α Standard solution should not be left at room temperature for more than 10 minutes. All standards, controls and samples should be run in duplicate. Refer to the Assay Layout Sheet to determine the number of wells to be used and put any remaining wells with the desiccant back into the pouch and seal the ziploc. Store unused wells at 4 °C. Pipet 100 µL of Assay Buffer into the S0 (0

pg/mL standard) wells. Pipet 100  $\mu$ L of Standards #1 through #6 into the appropriate wells. Pipet 100  $\mu$ L of the Samples into the appropriate wells. Tap the plate gently to mix the contents. Seal the plate and incubate at room temperature on a plate shaker for 1 hour at  $\sim$ 500 rpm. Empty the contents of the wells and wash by adding 400  $\mu$ L of wash solution to every well. Repeat the wash 4 more times for a total of **5 washes**. After the final wash, empty or aspirate the wells and firmly tap the plate on a lint free paper towel to remove any remaining wash buffer. Pipet 100  $\mu$ L of yellow Antibody into each well, except the Blank. Seal the plate and incubate at room temperature on a plate shaker for 1 hour at  $\sim$ 500 rpm. Empty the contents of the wells and wash by adding 400  $\mu$ L of wash solution to every well. Repeat the wash 4 more times for a total of **5 washes**. After the final wash, empty or aspirate the wells and firmly tap the plate on a lint free paper towel to remove any remaining wash buffer. Add 100  $\mu$ L of blue Conjugate to each well, except the Blank. Seal the plate and incubate at room temperature on a plate shaker for 30 minutes at  $\sim$ 500 rpm. Empty the contents of the wells and wash by adding 400  $\mu$ L of wash solution to every well. Repeat the wash 4 more times for a total of **5 washes**. After the final wash, empty or aspirate the wells and firmly tap the plate on a lint free paper towel to remove any remaining wash buffer. Pipet 100  $\mu$ L of Substrate Solution into each well. Incubate for 30 minutes at room temperature on a plate shaker at  $\sim$ 500 rpm. Pipet 100  $\mu$ L Stop Solution to each well. Blank the plate reader against the Blank wells, read the optical density at 450 nm. Calculate the average net Optical Density (OD) bound for each standard and sample by subtracting the average Blank OD from the average OD for each standard and sample. Using linear graph paper, plot the Average Net OD for each standard versus Bax concentration in each standard. Approximate a straight line through the points. The concentration of Bax in the unknowns can be determined by interpolation.

#### **4.2.8. Bcl-2 inhibition assay**

Mix all the reagents thoroughly without foaming before use. Wash the microwells twice with approximately 300  $\mu\text{L}$  Wash Buffer per well with thorough aspiration of microwell contents between washes. Take caution not to scratch the surface of the microwells. After the last wash, empty the wells and tap microwell strips on absorbent pad or paper towel to remove excess Wash Buffer. Use the microwell strips immediately after washing or place upside down on a wet absorbent paper for not longer than 15 minutes. Do not allow wells to dry. Add 100  $\mu\text{L}$  of Sample Diluent in duplicate to all standard wells and to the blank wells. Prepare standard (1:2 dilution) in duplicate ranging from 32 ng/mL to 0.5 ng/mL. Add 100  $\mu\text{L}$  of Sample Diluent, in duplicate, to the blank wells. Add 80  $\mu\text{L}$  of Sample Diluent, in duplicate, to the sample wells. Add 20  $\mu\text{L}$  of each Sample, in duplicate, to the designated wells. Add 50  $\mu\text{L}$  of diluted biotin-conjugate to all wells, including the blank wells. Cover with a plate cover and incubate at room temperature, on a microplate shaker at 100 rpm if available, for 2 hours. Remove plate cover and empty the wells. Wash microwell strips 3 times as described in step 2. Add 100  $\mu\text{L}$  of diluted Streptavidin-HRP to all wells, including the blank wells. Cover with a plate cover and incubate at room temperature, on a microplate shaker at 100 rpm if available, for 1 hour. Remove the plate cover and empty the wells. Wash microwell strips 3 times as described in step 2. Proceed to the next step. Pipette 100  $\mu\text{L}$  of mixed TMB Substrate Solution to all wells, including the blanks. Incubate the microwell strips at room temperature (18° to 25°C) for about 15 minutes, if available on a rotator set at 100 rpm. Avoid direct exposure to intense light. The point, at which the substrate reaction is stopped, is often determined by the ELISA reader. Many ELISA readers record absorbance only up to 2.0 O.D. Therefore, the color development within individual microwells must be watched by the person running the assay and the

substrate reaction stopped before positive wells are no longer properly detectable. Stop the enzyme reaction by quickly pipetting 100  $\mu$ L of Stop Solution into each well, including the blank wells. It is important that the Stop Solution is spread quickly and uniformly throughout the microwells to completely inactivate the enzyme. Results must be read immediately after the Stop Solution is added or within one hour if the microwell strips are stored at 2 - 8°C in the dark. Read the absorbance of each microwell on a spectrophotometer using 450 nm as the primary wavelength.

#### **4.2.3. Molecular Docking**

The crystal structure of EGFR complexed with erlotinib (PDB ID: 1M17) and BRAF<sup>V600E</sup> (PDB ID: 3OG7) were downloaded from the Protein Data Bank. Structure of compound **8d** was drawn and optimized using Marvin Sketch and Avogadro molecular editors. The protein was prepared using Autodock tools where the co-crystallized ligands and water molecules were removed then kollman charges and polar hydrogens were added. The grid dimensions for tubulin were set to 80x80x80. Autodock vina was used for molecular docking and the best docking poses were visualized using Discovery Studio Visualizer

#### **4.2.4. ADMET prediction**

The absorption, distribution, metabolism, excretion, and toxicity (ADMET) profile of compound **8d** was predicted using ADMETlab 3.0 (<https://admetmesh.scbdd.com/>), an integrated online platform that combines large curated datasets with multi-task graph neural network models for drug property assessment. The canonical SMILES of **8d** was

submitted to the server, and predictions were generated across a wide range of pharmacokinetic and toxicity endpoints.
